# Supplementary material for: Empowering healthcare providers through smoking cessation training in Malaysia: a preintervention and postintervention evaluation on the improvement of knowledge, attitude and self-efficacy
Source: PubMed Central journal article supplement — BMJ Open. 2019 Sep 27;9(9):e030670. doi: 10.1136/bmjopen-2019-030670 (PMC6773327; doi:10.1136/bmjopen-2019-030670), 2019-09-27
Supplement: bmjopen-2019-030670.draft_revisions.pdf [file bmjopen-2019-030670.draft_revisions.pdf]

# BMJ Open

BMJ Open is committed to open peer review. As part of this commitment we make the peer review history of every article we publish publicly available.

When an article is published we post the peer reviewers' comments and the authors' responses online. We also post the versions of the paper that were used during peer review. These are the versions that the peer review comments apply to.

The versions of the paper that follow are the versions that were submitted during the peer review process. They are not the versions of record or the final published versions. They should not be cited or distributed as the published version of this manuscript.

BMJ Open is an open access journal and the full, final, typeset and author-corrected version of record of the manuscript is available on our site with no access controls, subscription charges or pay-per-view fees (<http://bmjopen.bmj.com>).

If you have any questions on BMJ Open's open peer review process please email [info.bmjopen@bmj.com](mailto:info.bmjopen@bmj.com)

# BMJ Open

**EMPOWERING HEALTHCARE PROVIDERS THROUGH  
SMOKING CESSATION TRAINING: IMPACT ON KNOWLEDGE,  
ATTITUDE & SELF-EFFICACY. Word Count: 3063**

|                               |                                                                                                                                                                                                                                                                                                                                                                                                                                                                                                                                                                                                                                                               |
|-------------------------------|---------------------------------------------------------------------------------------------------------------------------------------------------------------------------------------------------------------------------------------------------------------------------------------------------------------------------------------------------------------------------------------------------------------------------------------------------------------------------------------------------------------------------------------------------------------------------------------------------------------------------------------------------------------|
| Journal:                      | <i>BMJ Open</i>                                                                                                                                                                                                                                                                                                                                                                                                                                                                                                                                                                                                                                               |
| Manuscript ID                 | bmjopen-2019-030670                                                                                                                                                                                                                                                                                                                                                                                                                                                                                                                                                                                                                                           |
| Article Type:                 | Research                                                                                                                                                                                                                                                                                                                                                                                                                                                                                                                                                                                                                                                      |
| Date Submitted by the Author: | 26-Mar-2019                                                                                                                                                                                                                                                                                                                                                                                                                                                                                                                                                                                                                                                   |
| Complete List of Authors:     | <p>Hasan, Siti Idayu; University of Malaya, Social &amp; Preventive Medicine; University of Malaya, Nicotine Addiction Research &amp; Collaboration, UMCAS</p> <p>Mohd Hairi, Farizah; University of Malaya, Social &amp; Preventive Medicine; University of Malaya, Nicotine Addiction Research &amp; Collaboration, UMCAS</p> <p>Ahmad Tajuddin, Amani @ Natasha; University of Malaya, Primary Care Medicine; University of Malaya, Nicotine Addiction Research &amp; Collaboration, UMCAS</p> <p>Amer Nordin, Amer Siddiq; University of Malaya, Psychological Medicine; University of Malaya, Nicotine Addiction Research &amp; Collaboration, UMCAS</p> |
| Keywords:                     | program evaluation, smoking cessation, healthcare providers, knowledge, attitude, self-efficacy                                                                                                                                                                                                                                                                                                                                                                                                                                                                                                                                                               |
|                               |                                                                                                                                                                                                                                                                                                                                                                                                                                                                                                                                                                                                                                                               |

SCHOLARONE™  
Manuscripts

**TITLE: EMPOWERING HEALTHCARE PROVIDERS THROUGH SMOKING CESSATION  
TRAINING: IMPACT ON KNOWLEDGE, ATTITUDE & SELF-EFFICACY.**

**SITI IDAYU HASAN <sup>1,4</sup> , FARIZAH MOHD HAIRI <sup>1,4</sup> NUR AMANI @ NATASHA AHMAD  
TAJUDDIN <sup>2,4</sup> & AMER SIDDIQ AMER NORDIN <sup>3,4</sup>,**

<sup>1</sup>Department of Social & Preventive Medicine, Faculty of Medicine, University of Malaya, Lembah Pantai, Kuala Lumpur, Malaysia.

<sup>2</sup>Department of Primary Care Medicine, Faculty of Medicine, University of Malaya, Lembah Pantai, Kuala Lumpur, Malaysia.

<sup>3</sup>Department of Psychological Medicine, Faculty of Medicine, University of Malaya, Lembah Pantai, Kuala Lumpur, Malaysia.

<sup>4</sup>Nicotine Addiction Research Group UMCAS, University of Malaya, Jalan Pantai Baharu, Kuala Lumpur, Malaysia.

**Authors:**

Department of Social & Preventive Medicine, Faculty of Medicine, University of Malaya, Lembah Pantai, 50603 Kuala Lumpur, Malaysia.  
Siti Idayu Hasan, PhD student, University of Malaya.

Department of Social & Preventive Medicine, Faculty of Medicine, University of Malaya, Lembah Pantai, 50603 Kuala Lumpur, Malaysia.  
Farizah Mohd Hairi, Associate Professor/Public Health Physician & Consultant, University of Malaya.

Department of Primary Care Medicine, Faculty of Medicine, University of Malaya, Lembah Pantai, 50603 Kuala Lumpur, Malaysia.  
Nur Amani @ Natasha Ahmad Tajuddin, Family Medicine Specialist, University of Malaya.

Department of Psychological Medicine, Faculty of Medicine, University of Malaya, Lembah Pantai, 50603 Kuala Lumpur, Malaysia.  
Amer Siddiq Amer Nordin, Associate Professor/Consultant Psychiatrist and Addiction Medicine Specialist.

**Correspond to :** Farizah Mohd Hairi at farizah@um.edu.my

**Word count: 3063**

**References count: 35**

## Abstract

Objectives: Health care providers sit in an ideal position to advise their patients to quit smoking by providing effective smoking cessation intervention. Thus, we evaluate the effectiveness of a one-day training program in changing the knowledge, attitude and self-efficacy of health care providers in smoking cessation intervention.

Methods: A pre-post study design was conducted in 2017. Eight-hour smoking cessation training comprised of lectures, practical session and role-play session was offered to 207 health care providers. A validated evaluation tool, ProSCiTE was administered to assess the impact of training on knowledge, attitude, and self-efficacy on smoking cessation intervention.

Results: After SCOPE training, knowledge score significantly increased from  $7.96 \pm 2.34$  to  $10.35 \pm 1.57$  ( $p < 0.001$ ). Attitude and self-efficacy in smoking cessation intervention also increased significantly from  $34.32 \pm 4.12$  to  $37.04 \pm 3.92$  ( $p < 0.001$ ) and  $40.31 \pm 8.61$  to  $54.67 \pm 7.45$  ( $p < 0.001$ ) respectively.

Conclusion: This study demonstrates that SCOPE training could improve health care providers' knowledge, attitude and self-efficacy on smoking cessation intervention. Future training is recommended to equip health care providers with current knowledge, right attitude and high self-efficacy to successfully integrate what they have learned into their practice.

Keywords: program evaluation, smoking cessation, healthcare providers, knowledge, attitude, self-efficacy

## Strengths and limitations of this study

- Healthcare providers often discuss about smoking with their patients, however, they have lack of necessary skills to help patients due to limited training.
- Actual ability of healthcare providers to provide effective intervention and needs of the patients still remain unknown.
- We evaluate the effectiveness of an eight-hour SCOPE training with combination of lectures, practical, and role-play sessions in terms of knowledge, attitude and self-efficacy among health care providers to deliver smoking cessation intervention.
- Our results indicate that SCOPE training improves healthcare providers' knowledge, attitude, and particularly confidence to provide smoking cessation intervention.
- Our findings suggest that tailored smoking cessation training should emphasize on practical skills to ensure healthcare providers adequately equipped to provide effective smoking cessation intervention.
- This study relies on self-reported response from healthcare providers thus data must be carefully analysed.

## Introduction

Tobacco use is one of the leading preventable causes of death and disease globally. Approximately, six million people die from tobacco related diseases every year and these caused one in 10 deaths among adult worldwide [1]. More than 600,000 people die each year from exposure to second hand smoke and it is estimated that by 2030, the annual death could rise to eight million [1]. The Surgeon General on “The Health Consequence of Smoking – 50 Years of Progress” 2014 report concluded that smoking can cause cancer, respiratory disease, cardiovascular disease, reproductive disease, dental disease, inflammatory bowel disease, diabetes and autoimmune disease [2]. Cochrane reviews provided concrete evidence that stopping smoking could reduce smoking related diseases [3]. More importantly, offering help to quit smoking by healthcare providers has been proven an effective strategy to combat tobacco related problem. Increasing the amount of behavioural support by healthcare providers is likely to increase the chance of success by about 10%-25% [4].

In order to tackle serious health problem arising from smoking, all healthcare providers are encouraged to actively involve in smoking cessation services. The U.S. Public Health Service has recommended the use of clinical practice guidelines for tobacco cessation. The tobacco cessation clinical practice guideline is a brief intervention known by the acronym of the “5 A’s” has been effective to use both in research and clinical practice [5, 6]. Healthcare providers reported they performed the first two “A’s” which are “Ask” and “Advise” [7]. However, not many evidence reporting the performance on the three remaining steps which are “Assess”, “Assist” and “Arrange”.

1  
2  
3 In addition, translating this guideline into practice remains a challenge because nicotine  
4 dependence is a chronic relapsing condition that requires continuous effort over time to  
5 achieve success therefore preventing relapse. Thus, to ensure successful and effective  
6 intervention, healthcare providers require skill to help smokers to overcome the ambivalence  
7 to change and guide them to appropriate counselling and pharmacotherapy treatments [8].  
8  
9  
10  
11  
12

13  
14  
15 According to the 4<sup>th</sup> Edition of Tobacco Atlas, doctors often informed patients about the  
16 harmful effect of smoking but they lack in training necessary to help their patients to stop  
17 using tobacco products. Therefore, there is a huge gap between the needs of the patients  
18 and the actual ability of the healthcare providers to help them [9]. In order to taper the gap,  
19 various trainings including face-to-face and online trainings have been developed to improve  
20 smoking cessation competency and proficiency. These training programs have shown to be  
21 effective in enhancing the counselling knowledge, skills and confidence of healthcare  
22 providers and their performance in smoking cessation intervention [10-15]. Meta-analysis by  
23 Cochrane Collaboration also showed healthcare providers who received specific training had  
24 higher probability of performing tasks required to help their patients to stop smoking  
25 compared to their untrained controls counterparts [3, 16].  
26  
27  
28  
29  
30  
31  
32  
33  
34  
35  
36  
37  
38  
39  
40  
41

42 One of the key resources needed to implement Article 14 of the WHO Framework  
43 Convention for Tobacco Control (FCTC) is sufficient numbers of healthcare providers trained  
44 to assess tobacco use and deliver brief advice about smoking cessation [17]. In line with  
45 this, Malaysia has developed a National Strategic Plan for Tobacco Control to achieve a  
46 tobacco free nation by 2045 with the target of less than 5% tobacco use prevalence.  
47 Currently, Smoking Cessation Organizing, Planning & Execution (SCOPE) training has been  
48 successfully developed and introduced since 2009 by a group of researchers from Nicotine  
49 Addiction Research Group of UMCAS. SCOPE is part of mQuit services recognized as one  
50 of the three pathways to become a certified smoking cessation provider in Malaysia. [18].  
51  
52  
53  
54  
55  
56  
57  
58  
59  
60

1  
2  
3 The purpose of this study was to assess the effectiveness of SCOPE training on smoking  
4 cessation in terms of knowledge, attitude and self-efficacy among healthcare providers.  
5  
6  
7

## 8 **Methods**

9

### 10 **Development of SCOPE training**

11

12  
13  
14 SCOPE is a comprehensive, one-day program. It consists of the latest update of evidence-  
15 based information on smoking cessation. This module was developed from our previous  
16 study 'Empowering Dentist into Smoking Cessation Program' (2009 -2013) by Nicotine  
17 Addiction research Group of UMCAS team where the need to offer intensive smoking  
18 cessation counselling was found to be important [19]. The content of the training includes  
19 knowledge in the basic science of tobacco use and clinical science of tobacco treatment.  
20 This training includes interactive lectures (questions and answer sessions, video  
21 presentation and quiz), practical session and role-play demonstration. The lectures consist  
22 of Introduction, Tobacco control and policy, National strategic plan, Harm to health, Smoking  
23 as an addiction, Pharmacological therapy and Behavioural therapy in smoking cessation.  
24 Practical and assessment on how to use tobacco dependence instrument, Fagerstome Test  
25 Nicotine Dependence (FTND) and how to monitor carbon monoxide level using smokerlyser  
26 as well as on how to run the quit smoking clinic was also included in this training. The goal of  
27 role-play session was to provide participants with guided, hands-on practise in addressing  
28 tobacco treatment with patients. Forty-five minutes session of role-play representing various  
29 cases of tobacco treatment with three different scenarios (for example, patient at different  
30 level of stages of change). Role-play was based on 5 A's counselling approach where the  
31 participants acted as smoking cessation providers, and the facilitator acted as a patient.  
32 Afterwards, the facilitators led a brief discussion on healthcare providers-delivered tobacco  
33 treatment challenges.  
34  
35  
36  
37  
38  
39  
40  
41  
42  
43  
44  
45  
46  
47  
48  
49  
50  
51  
52  
53  
54  
55  
56  
57  
58  
59  
60

### **Study design and participants**



1  
2  
3 A pre-post study design was conducted among healthcare providers who attended the 8-  
4 hour SCOPE training over a period of three months starting from December 2016 to  
5 February 2017. The study population comprised of a group of healthcare providers with  
6 different grades and specialities working at government health clinics in Malaysia. A total of  
7 207 healthcare providers who completed the training and returned the pre- and post-survey  
8 were included in this study. The healthcare providers consist of medical doctors, medical  
9 assistants, pharmacists and nurses.  
10  
11  
12  
13  
14  
15  
16  
17  
18  
19  
20

### 21 **Evaluation tool**

22  
23  
24 A validated evaluation tool called ProSCiTE was administered to the participants before and  
25 after training program [20, 21]. This tool was designed based on previous studies and further  
26 modified to meet the objective of this study. The questionnaire included demographic  
27 background, knowledge, attitude and self-efficacy on smoking cessation intervention.  
28 Demographic characteristics assessed were age, gender, education level, working  
29 experience, smoking status and type of profession. Knowledge is *an information,*  
30 *understanding or skill that healthcare providers get from experience or education.*  
31 Knowledge on smoking cessation withdrawal symptoms was assessed with 12 items with  
32 Yes/No response. Attitude is *the tendency, based on trust and experience, to respond to*  
33 *smoking cessation intervention with specific methods and approaches.* Attitude was  
34 assessed with 8 items rated by 5 point Likert scale ranging from *“not agree at all”* to  
35 *“absolutely agree”*. Self-efficacy is *one’s belief in one’s ability to succeed in specific*  
36 *situations or accomplish a task in smoking cessation intervention.* Self-efficacy was  
37 assessed with 13 items by 5 point Likert scale ranging from *“not agree at all”* to *“absolutely*  
38 *agree”*.  
39  
40  
41  
42  
43  
44  
45  
46  
47  
48  
49  
50  
51  
52  
53  
54

55  
56 Construct validity based on eigenvalues and factor loadings to confirm the factor structure  
57 (knowledge, attitude, self-efficacy) was acceptable. The internal consistency reliability of  
58  
59  
60

1  
2  
3 factor construct was excellent for knowledge ( $\alpha = 0.93$ ) and self- efficacy ( $\alpha = 0.93$ ) and  
4  
5 good for attitude (0.88) [21].  
6  
7

### 8 **Study procedures**

9  
10 All healthcare providers were scheduled and invited to join this study. They were explained  
11 on the purpose of the study prior the training. The providers were awarded with Continuing  
12 Professional Development (CPD) credit after completing the training. The pre-test survey  
13 was administered immediately before the training and post-test survey was administered  
14 immediately after the training.  
15  
16  
17  
18  
19  
20  
21  
22  
23  
24

### 25 **Ethical approval**

26  
27 This study was approved by the Ministry of Health Malaysia and Medical Ethics Committee  
28 of University of Malaya (Reference number: UM.TNC2/RC/H&E/UMREC-118) and of  
29 Ministry of Health Malaysia (Reference number: NMRR-16-2144-32353 (IIR)). Healthcare  
30 providers were informed and they gave consent before the pre-training survey prior to the  
31 SCOPE training.  
32  
33  
34  
35  
36  
37  
38  
39  
40  
41

### 42 **Data analysis**

43  
44 Data were analysed with IBM SPSS version 22. Descriptive analyses were conducted  
45 performed on the demographic items. Paired samples t-tests were used to compare pre- and  
46 post-test results. The level of statistical significance was set to  $p < 0.05$  for all analyses.  
47  
48  
49  
50  
51  
52  
53

## 54 **Results**

### 55 **Healthcare provider characteristics**

Nearly half of the healthcare providers were doctors. Their mean age was 32.59 (6.69) ranging from 23 to 55 years old. Almost two quarters were female and almost half of them held bachelor degree. Majority of the healthcare providers have working experience more than seven years. Majority of them reported that they are non-smokers and there are no current smokers in all profession except for medical assistant. (See Table 1).

Table 1: Healthcare providers' characteristics

| Variables          |                   | n (%)        |
|--------------------|-------------------|--------------|
| Age                |                   | 32.59 (6.69) |
| Mean (SD)          |                   |              |
| Working experience |                   | 7.26 (5.80)  |
| Mean(SD)           |                   |              |
| Gender             | Male              | 77 (35.3)    |
|                    | Female            | 141 (64.70)  |
| Ethnicity          | Malay             | 181 (83.00)  |
|                    | Chinese           | 16 (7.30)    |
|                    | Indian            | 21 (9.60)    |
| Religion           | Muslim            | 179 (82.10)  |
|                    | Buddhist          | 8 (3.70)     |
|                    | Christian         | 12 (5.50)    |
|                    | Hindu             | 19 (8.70)    |
| Education          | Diploma           | 73 (33.50)   |
|                    | Bachelor          | 100 (45.90)  |
|                    | Master            | 45 (20.60)   |
| Profession         | Nurse             | 34 (15.60)   |
|                    | Medical Assistant | 44 (20.20)   |
|                    | Pharmacist        | 42 (19.30)   |
|                    | Doctor            | 98 (45.00)   |
| Smoking*<br>status | Smokers           | 6 (2.80)     |
|                    | Former smokers    | 18 (8.40)    |
|                    | Non smokers       | 191 (88.80)  |

n = frequency

% = percentage

### **Changes in knowledge, attitudes and self-efficacy on smoking cessation intervention due to training**

A paired t-test was performed to compare pre- ( $7.96 \pm 2.34$ ) and post-training ( $10.35 \pm 1.57$ ) on knowledge scores. Participants' post-training average scores were 2.39 higher compared to their pre-training scores (95% CI 2.25, 0.16). The difference was statistically significant,  $t(206) = 15.32$ ,  $p = <0.001$ . Each item in knowledge significantly increased after the training. It was also showed that healthcare providers' knowledge on mouth ulcers as a withdrawal symptom for nicotine addiction gains the greatest change in score followed by diarrhea. Before the training, most of healthcare providers did not know that diarrhea was the one of the withdrawal symptoms for nicotine addiction. (See Table 2).

Table 2: Paired sample t-test comparing pre- and post-tests for each item and total knowledge score.

| Variables              | Pre-training Mean (SD) | Post-training Mean (SD) | p-value          |
|------------------------|------------------------|-------------------------|------------------|
| 1. Irritability        | 0.99 (0.10)            | 1.16 (0.50)             | <0.001           |
| 2. Depression          | 0.98 (0.15)            | 1.34 (0.60)             | <0.001           |
| 3. Restlessness        | 0.99 (0.10)            | 1.05 (0.30)             | 0.006            |
| 4. Poor concentration  | 0.99 (0.12)            | 1.12 (0.43)             | <0.001           |
| Increased appetite     | 0.85 (0.36)            | 1.55 (0.61)             | <0.001           |
| Weight gain            | 0.82 (0.38)            | 1.56 (0.63)             | <0.001           |
| Light headedness       | 0.96 (0.20)            | 1.26 (0.59)             | <0.001           |
| Night time awakening   | 0.90 (0.30)            | 1.49 (0.72)             | <0.001           |
| Constipation           | 0.84 (0.37)            | 1.74 (0.78)             | <0.001           |
| Diarrhea               | 0.27 (0.45)            | 2.01 (0.68)             | <0.001           |
| Mouth ulcers           | 0.80 (0.40)            | 1.86 (0.69)             | <0.001           |
| Urge to smoke          | 0.98 (0.15)            | 1.07 (0.32)             | 0.001            |
| <b>Total knowledge</b> | <b>7.96 (2.34)</b>     | <b>10.35 (1.57)</b>     | <b>&lt;0.001</b> |

SD: standard deviation

Before the training, the mean score of total attitude was  $34.32 \pm 4.12$  while after completing the training, the mean score of total attitude increased to maximum score,  $37.04 \pm 3.92$ . On average, participant's post-training score was 2.72 higher than their pre-training score (95% CI 2.07, 3.37). The difference was statistically significant,  $t(201) = 8.23$ ,  $p = <0.001$ . Each item in attitude significantly increased after the training. Attitude of healthcare providers

towards patients/clients want them to advise patients to stop using any tobacco products gained the greatest change in score followed by patient /client's chance of quitting smoking increases if the healthcare provider advises patients to quit. Before the training, it showed that attitude towards asking parents/guardian on the effect of second-hand smoke were lowest. However, after the training, the attitude towards second-hand smoke increased. (See Table 3).

Table 3: Paired sample t-test comparing pre- and post-tests for each item and total attitude score.

| Items                                                                                                           | Pre-training Mean (SD) | Post-training Mean (SD) | p-value          |
|-----------------------------------------------------------------------------------------------------------------|------------------------|-------------------------|------------------|
| 1. A patient /client's chance of quitting smoking increases if the healthcare provider advises him/her to quit. | 3.85 (0.89)            | 4.52 (0.67)             | <0.001           |
| 2. Patients/clients want you to advise them to stop using any tobacco products.                                 | 3.59 (0.86)            | 4.34 (0.75)             | <0.001           |
| <b>Healthcare providers like you should....</b>                                                                 |                        |                         |                  |
| 3. get specific training on smoking cessation counselling techniques.                                           | 4.56 (0.60)            | 4.72 (0.57)             | 0.002            |
| 4. set a good example for their patients/clients and public by not using any tobacco products.                  | 4.64 (0.58)            | 4.75 (0.55)             | 0.029            |
| 5. routinely ask patients/clients about tobacco use.                                                            | 4.38 (0.66)            | 4.69 (0.59)             | 0.006            |
| 6. routinely ask parents/guardians about tobacco use during paediatric visits.                                  | 4.29 (0.75)            | 4.61 (0.7)              | <0.001           |
| 7. routinely advise patients/clients who use any tobacco products to quit.                                      | 4.49 (0.650)           | 4.72 (0.59)             | <0.001           |
| 8. routinely assist patients/clients using any tobacco products to quit.                                        | 4.52 (0.64)            | 4.71 (0.60)             | 0.001            |
| <b>Total Attitude</b>                                                                                           | <b>34.32 (4.12)</b>    | <b>37.04 (3.92)</b>     | <b>&lt;0.001</b> |

SD: standard deviation

A significant increase in healthcare providers' self-efficacy was also found when pre- and post-training was compared. For pre-training, the mean score of total self-efficacy was  $40.31 \pm 8.61$  while at post-training the mean score increased to  $54.67 \pm 7.45$ . On average, healthcare providers' post-training score was 14.36 higher than their pre-training score, 95% CI (0.63, 0.84). The difference was statistically significant,  $t(205) = 23.22$ ,  $p = <0.001$ . Each item in self-efficacy significantly increased after the training. Practical and assessment module on how to detect Carbon monoxide in breath using smokerlyser depicted greatest

change in score followed by pharmacological therapy to assist smokers to quit and behavioral therapy to prescribe medication to treat smokers. Healthcare providers have lowest confidence in using smokerlyser before the training. However, it showed greater improvement from the practical session in the training. (See Table 4).

Table 4: Paired sample t-test comparing pre- and post-tests for each item and total self-efficacy score

| Items                                                                                                                               | Pre-training<br>Mean (SD) | Post-training<br>Mean (SD) | p-value          |
|-------------------------------------------------------------------------------------------------------------------------------------|---------------------------|----------------------------|------------------|
| 1. I know appropriate questions to ask my patients/clients.                                                                         | 3.78 (0.84)               | 4.45 (0.60)                | <0.001           |
| 2. I am able to motivate my patients/clients who are interested to quit smoking.                                                    | 3.85 (0.81)               | 4.40 (0.62)                | <0.001           |
| 3. I am able to assist patients/clients to quit even if the patient thinks that it is difficult to give up.                         | 3.68 (0.81)               | 4.27 (0.65)                | <0.001           |
| 4. I have the pharmacological therapy skills to assist patients/clients to quit smoking.                                            | 3.35 (1.06)               | 4.15 (0.87)                | <0.001           |
| 5. I have the behavioral therapy skills to assist patients/clients to quit smoking.                                                 | 3.28 (0.96)               | 4.14 (0.72)                | <0.001           |
| 6. I can advise patients/clients to consider smoking cessation.                                                                     | 4.14 (4.14)               | 4.50 (0.56)                | <0.001           |
| 7. I can provide counselling when time is limited.                                                                                  | 3.18 (0.97)               | 3.89 (0.94)                | <0.001           |
| 8. I can counsel patients/clients who are not interested in quitting.                                                               | 3.31 (0.94)               | 4.05 (0.82)                | <0.001           |
| 9. I know how to prescribe medication (nicotine replacement therapy/bupropion) to treat tobacco dependency.                         | 2.93 (1.26)               | 3.81 (1.07)                | <0.001           |
| 10. I can assess patient's/client's different stages of readiness to quit smoking.                                                  | 3.50 (0.96)               | 4.17 (0.75)                | <0.001           |
| 11. I can assess patient's level of nicotine dependency using the Fagerstrom test.                                                  | 3.43 (1.21)               | 4.30 (0.86)                | <0.001           |
| 12. I can use smokerlyser to determine patient's/client's carbon monoxide level.                                                    | 2.63 (1.34)               | 4.28 (1.07)                | <0.001           |
| 13. I can assist recent quitters to learn how to cope with situations or triggers that might lead them to relapse to using tobacco. | 3.37 (1.02)               | 4.28 (0.70)                | <0.001           |
| <b>Total Self-efficacy</b>                                                                                                          | <b>40.31 (8.61)</b>       | <b>54.67 (7.45)</b>        | <b>&lt;0.001</b> |

SD: standard deviation

## Discussion

1  
2  
3 This study established an evaluation of a tailored-smoking cessation training for healthcare  
4 providers based on lecture, practical and role-play. Our study showed significant  
5 improvement in healthcare providers' knowledge, attitude and self-efficacy in smoking  
6 cessation intervention. Importantly this was also the first evaluation of such a training  
7 intervention among healthcare providers using the 5 A's in a Malaysia context. This study  
8 results suggested that training the healthcare providers in smoking cessation is effective in  
9 the short term and can results in significant integration of 5A's in smoking cessation  
10 intervention. This study is consistent with international findings that have demonstrated  
11 smoking cessation training can be effective in providing smoking cessation intervention [3,  
12 15, 22-25].  
13  
14  
15  
16  
17  
18  
19  
20  
21  
22  
23  
24  
25  
26  
27

28 In this present study, significant improvement of knowledge, attitude and self-efficacy was  
29 found after the SCOPE training. It is in agreement with previous studies in which health care  
30 providers have reported improved in knowledge, attitude and self-efficacy in smoking  
31 cessation intervention after training [26-29]. This result suggested that healthcare providers  
32 have good knowledge in smoking cessation.  
33  
34  
35  
36  
37  
38  
39  
40  
41

42 This study also discovered the smoking status among SCOPE participants, whereby there  
43 are no current smokers in the doctors, pharmacists and the nurses groups. When compared  
44 with a study conducted in Bosnia Herzegovina, where there is no established smoking  
45 cessation program yet, more than half of the nurses who worked at the Family Medicine  
46 teaching centre smoke, and about 40% physicians smoke. In terms of attitude, the ever  
47 smokers among these professionals would most likely not advocate their patients for  
48 smoking cessation despite agreeing that smoking is harmful to health and would not advise  
49 young adults to start smoking [30]. Previous studies also reported that non-smokers  
50 healthcare providers had more positive attitude towards the hospital's smoke-free policy  
51  
52  
53  
54  
55  
56  
57  
58  
59  
60



1  
2  
3 compared to smokers [31, 32]. With the SCOPE program, in the attitude component, the  
4 training has improved their attitude towards advocating and advising patients to stop  
5 smoking. This evidently showed the importance of having a structured and well-organized  
6 smoking cessation program, to better assist healthcare providers in Malaysia in helping  
7 patients to quit smoking.  
8  
9  
10  
11  
12  
13  
14  
15  
16

17 When participants were asked to give their responses to their attitude towards providing  
18 smoking cessation intervention to their patients, it showed significant improvement post  
19 training particularly for second-hand smoke. This evidence supports the importance of  
20 identifying and advising parents on the harmful effect of second-hand smoke. However, this  
21 study could explore more in terms of their attitude towards smoking cessation advice, where  
22 in depth questions or qualitative approach would help answer this section on attitude. A  
23 systematic review on belief and attitude of physicians in United Kingdom revealed that the  
24 three most prevalent negative beliefs concerned the time needed to discuss smoking, a  
25 perceived lack of effectiveness of such discussions, and a perceived lack of skill in  
26 conducting such discussions [33]. As skill is concerned, training in smoking cessation  
27 program can increase the level of confidence among quit smoking providers, and in with  
28 experience, can reduce the consultation time and increase the effectiveness of consultation.  
29 Although most healthcare providers already have positive attitude scores towards smoking  
30 cessation intervention at pre training, the mean total attitude scores increased significantly at  
31 post training. This reflected that the training could help healthcare providers to understand  
32 their role in providing smoking cessation intervention. Thus, it is important to equip them with  
33 skills to competently assist smokers to quit [34].  
34  
35  
36  
37  
38  
39  
40  
41  
42  
43  
44  
45  
46  
47  
48  
49  
50  
51  
52  
53  
54  
55

56 The study findings also suggested that there is a huge potential benefit by training all  
57 healthcare providers, particularly in self-efficacy. However, when self-efficacy was explored  
58  
59  
60



1  
2  
3 by each item, it was apparent that they lacked in confidence about the 5A's component at  
4 pre-training with "Ask" and "Advise" being higher and "Assess", "Assist" and "Arrange"  
5 somewhat lower. The confidence level was increased for all these 5 A's after the training  
6 especially "Assist" and "Assess". It showed that SCOPE training have potential in  
7 increasing knowledge, attitude and self-efficacy of healthcare providers. Our result was in  
8 accordance with previous study suggesting that simple activities like "Ask" and "Advise"  
9 supported by existing systems that prompt good performance whereas "Assess", and  
10 "Assist" require more complex skill sets. Additional to that, higher degree of coordinated  
11 clinic system needed for "Arrange" for follow up cases for clinicians. Integrated system-  
12 based approach involving multiple top down stakeholders and environmental factors with the  
13 goal of connecting administrators, clinicians and staff to develop effective strategies to  
14 provide smokers with smoking cessation intervention is indeed needed [24]. Apart from that,  
15 updated clinical practice guideline for treating tobacco use and dependence has emphasized  
16 the increasing evidence that healthcare system significantly affects the likelihood that  
17 smokers receive effective smoking cessation intervention [6]. We suggest that video  
18 demonstration, role-play [35] and practical session play a very important role to help in  
19 increasing confidence of healthcare providers in providing more complex 5 A's components.  
20 It was also observed that healthcare providers could provide effective intervention, as they  
21 were more confident to assess and assist patients from ambivalence stage to change and  
22 then offering them with appropriate behavioural and pharmacotherapy intervention.  
23  
24  
25  
26  
27  
28  
29  
30  
31  
32  
33  
34  
35  
36  
37  
38  
39  
40  
41  
42  
43  
44  
45  
46  
47  
48

49 With respect to the self-efficacy, SCOPE training particularly increased healthcare providers'  
50 confidence to use smokerlyser followed by behavioural therapy and pharmacotherapy thus  
51 suggesting that more emphasize should be made for these training module as the pre-  
52 training score is lowest compared to others. This again supported the evidence that training  
53 on smoking cessation should be widely and continuously provided to all healthcare providers  
54  
55  
56  
57  
58  
59  
60

1  
2  
3 to help increasing their performance using more complex components in the 5 A's smoking  
4  
5 cessation intervention.  
6  
7  
8  
9

10  
11 Nevertheless, our study has some limitations that should be addressed. Firstly, it relies on  
12 self-reported response from our healthcare providers. Data must be carefully analysed as  
13 they healthcare providers tend to over-report the frequency of smoking cessation  
14 intervention. The healthcare providers involved in this study were only from three out of  
15 fourteen states in Malaysia. Thus, generalizability to overall population of healthcare  
16 providers should be cautioned. Future study should consider having a control group,  
17 preferably in a larger sample to improve the significance of this study.  
18  
19  
20  
21  
22  
23  
24  
25  
26  
27  
28  
29

## 30 Conclusion

31  
32  
33 In conclusion, this study demonstrates that SCOPE training improved healthcare providers'  
34 knowledge, attitude and self-efficacy on smoking cessation intervention. Future training is  
35 recommended to better equip healthcare providers with the latest knowledge, right attitude  
36 and high self-efficacy to successfully integrate what they have learned into their practice.  
37  
38  
39  
40  
41  
42  
43  
44

## 45 Conflict of interest

46  
47  
48 The other authors have no competing interest to declare.  
49  
50  
51  
52  
53

## 54 Funding

55  
56  
57 This study was funded by University of Malaya Grand Challenge Research Grant, Wellness  
58 Cluster (GC004A-15HTM).  
59  
60

## Acknowledgements

The authors would like to express our sincere gratitude to the speakers from NARCC group and healthcare providers for their generous contribution to this project.

## Author statement

Siti Idayu was responsible for study design, data collection, analysis and drafted the manuscript. Farizah was responsible for developing training module, supervising and reviewing manuscript. Nur Amani @ Natasha was involved in the reviewing manuscript. Amer Siddiq was responsible for developing training module, supervising and reviewing manuscript as well as investigator for this study. All authors critically reviewed the manuscript and approved the final version.

## References

1. WHO, *WHO global report on trends in prevalence of tobacco smoking 2015*. . 2015.
2. Alberg, A.J., D.R. Shopland, and K.M. Cummings, *The 2014 Surgeon General's Report: Commemorating the 50th Anniversary of the 1964 Report of the Advisory Committee to the US Surgeon General and Updating the Evidence on the Health Consequences of Cigarette Smoking*. American Journal of Epidemiology, 2014. **179**(4): p. 403-412.
3. Carson KV, V.M., Crone MR, Brinn MP, Esterman AJ, Assendelft WJJ, Smith BJ. , *Training health professionals in smoking cessation*. . Cochrane Database of Systematic Reviews, 2012. **Art. No.:** **CD000214**(5).
4. Stead, L., et al., *Physician advice for smoking cessation*. Cochrane Database of Systematic Reviews, 2013. **5**.
5. Fiore, M.C., C.R. Jaén, and T.B. Baker, *Treating Tobacco Use and Dependence:2008 Update.Clinical Practice Guideline*. 2008, Rockville, MD: U.S. Department of Health and Human Services. Public Health Service.
6. Siu, A.L. and U.S.P.S.T.F. for the, *Behavioral and pharmacotherapy interventions for tobacco smoking cessation in adults, including pregnant women: U.s. preventive services task force recommendation statement*. Annals of Internal Medicine, 2015. **163**(8): p. 622-634.

7. Quinn, V.P., et al., *Effectiveness of the 5-As Tobacco Cessation Treatments in Nine HMOs*. Journal of General Internal Medicine, 2009. **24**(2): p. 149-154.
8. Rigotti, N.A., *Training Future Physicians to Deliver Tobacco Cessation Treatment*. Journal of General Internal Medicine, 2016. **31**(2): p. 144-146.
9. Wipfli, H., *The Tobacco Atlas, Fourth Edition*. American Journal of Epidemiology, 2012. **176**(12): p. 1193-1193.
10. Brose, L.S., et al., *Treatment manuals, training and successful provision of stop smoking behavioural support*. Behaviour Research and Therapy, 2015. **71**: p. 34-39.
11. Brose, L.S., et al., *Effectiveness of an online knowledge training and assessment program for stop smoking practitioners*. Nicotine & Tobacco Research: Official Journal Of The Society For Research On Nicotine And Tobacco, 2012. **14**(7): p. 794-800.
12. Martin, B.A., R.H. Bruskiwitz, and B.A. Chewing, *Effect of a tobacco cessation continuing professional education program on pharmacists' confidence, skills, and practice-change behaviors*. Journal of the American Pharmacists Association : JAPhA, 2010. **50**(1): p. 9-16.
13. Hayes, R.B., et al., *Teaching tobacco dependence treatment and counseling skills during medical school: Rationale and design of the Medical Students helping patients Quit tobacco (MSQuit) group randomized controlled trial*. Contemporary Clinical Trials, 2014. **37**(2): p. 284-293.
14. Ockene, J.K., et al., *Teaching Medical Students to Help Patients Quit Smoking: Outcomes of a 10-School Randomized Controlled Trial*. Journal of General Internal Medicine, 2016. **31**(2): p. 172-181.
15. Sheffer, C.E., C. Barone, and M.E. Anders, *Training Nurses in the Treatment of Tobacco Use and Dependence: Pre- and Post-Training Results*. Journal of advanced nursing, 2011. **67**(1): p. 176-183.
16. Cornuz, J., et al., *Efficacy of Resident Training in Smoking Cessation A Randomized, Controlled Trial of a Program Based on Application of Behavioral Theory and Practice with Standardized Patients*. Annals of Internal Medicine, 2002. **136**(6): p. 429-437.
17. Kruse, G.R., et al., *Tobacco Dependence Treatment Training Programs: An International Survey*. Nicotine & Tobacco Research, 2016. **18**(5): p. 1012-1018.
18. Amer Nordin, A.S., F. Mohd Hairi, and N.A.N. Ahmad Tajuddin, *Malaysia: mQuit strengthens quit smoking strategy*. Tobacco Control 2016. **25**: p. 498-501.
19. Amer Siddiq, A.N., et al., *Empowering Malaysian dentists to tobacco dependence treatment conduct*. International Dental Journal, 2014. **64**(4): p. 206-212.
20. Hasan, S.I., et al., *Content validity for the questionnaire on Knowledge, Attitude and Behaviour (KAB) towards smoking cessation intervention among health care providers* Poster presented at Society for Research on Nicotine and Tobacco 23rd Annual Meeting, 8-11 March 2017, Florence, Italy., 2017.
21. Hasan, S.I., F. Mohd Hairi, and A.S. Amer Nordin, *Construct Validity and Internal Consistency Reliability of Providers Smoking Cessation Evaluation (ProSciTE) Tool*. 12th Asia Pacific Conference on Tobacco or Health (APACT). 2018.
22. Hagimoto, A., et al., *Effects of Trained Health Professionals' Behavioral Counseling Skills on Smoking Cessation Outcomes*. Annals of Behavioral Medicine, 2018: p. kax049-kax049.
23. Malan, Z., B. Mash, and K. Everett-Murphy, *Evaluation of a training programme for primary care providers to offer brief behaviour change counselling on risk factors for non-communicable diseases in South Africa*. Patient Education and Counseling, 2016. **99**(1): p. 125-131.
24. Payne, T.J., et al., *The impact of brief tobacco treatment training on practice behaviours, self-efficacy and attitudes among healthcare providers*. International Journal of Clinical Practice, 2014. **68**(7): p. 882-889.

- 1
- 2
- 3
- 4 25. Thomas, T., et al., *Effectiveness of a tailored training programme in behaviour*
- 5 *change counselling for community pharmacists: A pilot study*. Patient Education and
- 6 Counseling, 2016. **99**(1): p. 132-138.
- 7
- 8 26. Herold, R., et al., *Structured Smoking Cessation Training for Medical Students: A*
- 9 *Prospective Study*. Nicotine & Tobacco Research, 2016. **18**(12): p. 2209-2215.
- 10
- 11 27. Jones, L.L. and A. McEwen, *Evaluating an online training module on protecting*
- 12 *children from secondhand smoke exposure: impact on knowledge, confidence and*
- 13 *self-reported practice of health and social care professionals*. BMC Public Health,
- 14 2015. **15**: p. 6.
- 15
- 16 28. Susi, A.K., et al., *Impact of Smoking Cessation Training for Community Pharmacists*
- 17 *in Indonesia*. Asian Pacific Journal of Cancer Prevention, 2015. **16**(8): p. 3319-3323.
- 18
- 19 29. Williams, J.M., et al., *Increasing Tobacco Dependence Treatment Through*
- 20 *Continuing Education Training for Behavioral Health Professionals*. Psychiatric
- 21 Services, 2015. **66**(1): p. 21-26.
- 22
- 23 30. Hodgetts, G., T. Broers, and M. Godwin, *Smoking behaviour, knowledge and*
- 24 *attitudes among Family Medicine physicians and nurses in Bosnia and Herzegovina*.
- 25 BMC Fam Pract, 2004. **5**.
- 26
- 27 31. Chang, J.-C., et al., *Knowledge, Attitudes, and Behavior Toward Smoking Cessation*
- 28 *among Hospital Pharmacists in Taiwan*. Journal of Experimental & Clinical Medicine,
- 29 2012. **4**(4): p. 249-254.
- 30
- 31 32. Movsisyan, N.K., et al., *Smoking behavior, attitudes, and cessation counseling*
- 32 *among healthcare professionals in Armenia*. BMC Public Health, 2012. **12**(1): p. 1-8.
- 33
- 34 33. Vogt, F., S. Hall, and T.M. Marteau, *General practitioners' and family physicians'*
- 35 *negative beliefs and attitudes towards discussing smoking cessation with patients: a*
- 36 *systematic review*. 2005. **100**(10): p. 1423-1431.
- 37
- 38 34. Saba, M., R. Bittoun, and B. Saini, *A Workshop on Smoking Cessation for Pharmacy*
- 39 *Students*. American Journal of Pharmaceutical Education, 2013. **77**(9): p. 198.
- 40
- 41 35. Stolz, D., et al., *Enhanced Didactic Methods of Smoking Cessation Training for*
- 42 *Medical Students—A Randomized Study*. Nicotine & Tobacco Research, 2012.
- 43 **14**(2): p. 224-228.
- 44
- 45
- 46
- 47
- 48
- 49
- 50
- 51
- 52
- 53
- 54
- 55
- 56
- 57
- 58
- 59
- 60

## STROBE Statement—checklist of items that should be included in reports of observational studies

|                              | Item No. | Recommendation                                                                                                                                                                             | Page No. | Relevant text from manuscript |
|------------------------------|----------|--------------------------------------------------------------------------------------------------------------------------------------------------------------------------------------------|----------|-------------------------------|
| <b>Title and abstract</b>    | 1        | (a) Indicate the study's design with a commonly used term in the title or the abstract                                                                                                     | 2        | pre-post study design         |
|                              |          | (b) Provide in the abstract an informative and balanced summary of what was done and what was found                                                                                        | 3        |                               |
| <b>Introduction</b>          |          |                                                                                                                                                                                            |          |                               |
| Background/rationale         | 2        | Explain the scientific background and rationale for the investigation being reported                                                                                                       | 4-5      |                               |
| Objectives                   | 3        | State specific objectives, including any prespecified hypotheses                                                                                                                           | 5        |                               |
| <b>Methods</b>               |          |                                                                                                                                                                                            |          |                               |
| Study design                 | 4        | Present key elements of study design early in the paper                                                                                                                                    | 6        |                               |
| Setting                      | 5        | Describe the setting, locations, and relevant dates, including periods of recruitment, exposure, follow-up, and data collection                                                            | 6-7      |                               |
| Participants                 | 6        | (a) <i>Cohort study</i> —Give the eligibility criteria, and the sources and methods of selection of participants. Describe methods of follow-up                                            | 7        |                               |
|                              |          | <i>Case-control study</i> —Give the eligibility criteria, and the sources and methods of case ascertainment and control selection. Give the rationale for the choice of cases and controls |          |                               |
|                              |          | <i>Cross-sectional study</i> —Give the eligibility criteria, and the sources and methods of selection of participants                                                                      |          |                               |
|                              |          | (b) <i>Cohort study</i> —For matched studies, give matching criteria and number of exposed and unexposed                                                                                   |          |                               |
|                              |          | <i>Case-control study</i> —For matched studies, give matching criteria and the number of controls per case                                                                                 |          |                               |
| Variables                    | 7        | Clearly define all outcomes, exposures, predictors, potential confounders, and effect modifiers. Give diagnostic criteria, if applicable                                                   | 7        |                               |
| Data sources/<br>measurement | 8*       | For each variable of interest, give sources of data and details of methods of assessment (measurement). Describe comparability of assessment methods if there is more than one group       | 7        |                               |
| Bias                         | 9        | Describe any efforts to address potential sources of bias                                                                                                                                  |          |                               |
| Study size                   | 10       | Explain how the study size was arrived at                                                                                                                                                  |          |                               |

Continued on next page



|                        |     |                                                                                                                                                                                                                                                                                                                                                                                                                                                                                                                                                                   |     |
|------------------------|-----|-------------------------------------------------------------------------------------------------------------------------------------------------------------------------------------------------------------------------------------------------------------------------------------------------------------------------------------------------------------------------------------------------------------------------------------------------------------------------------------------------------------------------------------------------------------------|-----|
| Quantitative variables | 11  | Explain how quantitative variables were handled in the analyses. If applicable, describe which groupings were chosen and why                                                                                                                                                                                                                                                                                                                                                                                                                                      | 8   |
| Statistical methods    | 12  | (a) Describe all statistical methods, including those used to control for confounding<br>(b) Describe any methods used to examine subgroups and interactions<br>(c) Explain how missing data were addressed<br>(d) <i>Cohort study</i> —If applicable, explain how loss to follow-up was addressed<br><i>Case-control study</i> —If applicable, explain how matching of cases and controls was addressed<br><i>Cross-sectional study</i> —If applicable, describe analytical methods taking account of sampling strategy<br>(e) Describe any sensitivity analyses | 8   |
| <b>Results</b>         |     |                                                                                                                                                                                                                                                                                                                                                                                                                                                                                                                                                                   |     |
| Participants           | 13* | (a) Report numbers of individuals at each stage of study—eg numbers potentially eligible, examined for eligibility, confirmed eligible, included in the study, completing follow-up, and analysed<br>(b) Give reasons for non-participation at each stage<br>(c) Consider use of a flow diagram                                                                                                                                                                                                                                                                   |     |
| Descriptive data       | 14* | (a) Give characteristics of study participants (eg demographic, clinical, social) and information on exposures and potential confounders<br>(b) Indicate number of participants with missing data for each variable of interest<br>(c) <i>Cohort study</i> —Summarise follow-up time (eg, average and total amount)                                                                                                                                                                                                                                               | 8-9 |
| Outcome data           | 15* | <i>Cohort study</i> —Report numbers of outcome events or summary measures over time<br><i>Case-control study</i> —Report numbers in each exposure category, or summary measures of exposure<br><i>Cross-sectional study</i> —Report numbers of outcome events or summary measures                                                                                                                                                                                                                                                                                 |     |
| Main results           | 16  | (a) Give unadjusted estimates and, if applicable, confounder-adjusted estimates and their precision (eg, 95% confidence interval). Make clear which confounders were adjusted for and why they were included<br>(b) Report category boundaries when continuous variables were categorized<br>(c) If relevant, consider translating estimates of relative risk into absolute risk for a meaningful time period                                                                                                                                                     |     |

Continued on next page

|                          |    |                                                                                                                                                                            |       |
|--------------------------|----|----------------------------------------------------------------------------------------------------------------------------------------------------------------------------|-------|
| Other analyses           | 17 | Report other analyses done—eg analyses of subgroups and interactions, and sensitivity analyses                                                                             |       |
| <b>Discussion</b>        |    |                                                                                                                                                                            |       |
| Key results              | 18 | Summarise key results with reference to study objectives                                                                                                                   | 13    |
| Limitations              | 19 | Discuss limitations of the study, taking into account sources of potential bias or imprecision. Discuss both direction and magnitude of any potential bias                 | 16    |
| Interpretation           | 20 | Give a cautious overall interpretation of results considering objectives, limitations, multiplicity of analyses, results from similar studies, and other relevant evidence | 13-15 |
| Generalisability         | 21 | Discuss the generalisability (external validity) of the study results                                                                                                      | 16    |
| <b>Other information</b> |    |                                                                                                                                                                            |       |
| Funding                  | 22 | Give the source of funding and the role of the funders for the present study and, if applicable, for the original study on which the present article is based              | 16    |

\*Give information separately for cases and controls in case-control studies and, if applicable, for exposed and unexposed groups in cohort and cross-sectional studies.

**Note:** An Explanation and Elaboration article discusses each checklist item and gives methodological background and published examples of transparent reporting. The STROBE checklist is best used in conjunction with this article (freely available on the Web sites of PLoS Medicine at <http://www.plosmedicine.org/>, Annals of Internal Medicine at <http://www.annals.org/>, and Epidemiology at <http://www.epidem.com/>). Information on the STROBE Initiative is available at [www.strobe-statement.org](http://www.strobe-statement.org).



# BMJ Open

## EMPOWERING HEALTHCARE PROVIDERS THROUGH SMOKING CESSATION TRAINING IN MALAYSIA: A PRE- AND POST-INTERVENTION EVALUATION ON THE IMPROVEMENT OF KNOWLEDGE, ATTITUDE & SELF-EFFICACY.

|                                 |                                                                                                                                                                                                                                                                                                                                                                                                                                                                                                                                                                                                                    |
|---------------------------------|--------------------------------------------------------------------------------------------------------------------------------------------------------------------------------------------------------------------------------------------------------------------------------------------------------------------------------------------------------------------------------------------------------------------------------------------------------------------------------------------------------------------------------------------------------------------------------------------------------------------|
| Journal:                        | <i>BMJ Open</i>                                                                                                                                                                                                                                                                                                                                                                                                                                                                                                                                                                                                    |
| Manuscript ID                   | bmjopen-2019-030670.R1                                                                                                                                                                                                                                                                                                                                                                                                                                                                                                                                                                                             |
| Article Type:                   | Original research                                                                                                                                                                                                                                                                                                                                                                                                                                                                                                                                                                                                  |
| Date Submitted by the Author:   | 18-Jun-2019                                                                                                                                                                                                                                                                                                                                                                                                                                                                                                                                                                                                        |
| Complete List of Authors:       | Hasan, Siti Idayu; University of Malaya, Social & Preventive Medicine; University of Malaya, Nicotine Addiction Research & Collaboration, UMCAS<br>Mohd Hairi, Farizah; University of Malaya, Social & Preventive Medicine; University of Malaya, Nicotine Addiction Research & Collaboration, UMCAS<br>Ahmad Tajuddin, Amani @ Natasha; University of Malaya, Primary Care Medicine; University of Malaya, Nicotine Addiction Research & Collaboration, UMCAS<br>Amer Nordin, Amer Siddiq; University of Malaya, Psychological Medicine; University of Malaya, Nicotine Addiction Research & Collaboration, UMCAS |
| <b>Primary Subject Heading</b>: | Medical education and training                                                                                                                                                                                                                                                                                                                                                                                                                                                                                                                                                                                     |
| Secondary Subject Heading:      | Addiction, Health policy, Public health, Smoking and tobacco                                                                                                                                                                                                                                                                                                                                                                                                                                                                                                                                                       |
| Keywords:                       | program evaluation, smoking cessation, healthcare providers, knowledge, attitude, self-efficacy                                                                                                                                                                                                                                                                                                                                                                                                                                                                                                                    |
|                                 |                                                                                                                                                                                                                                                                                                                                                                                                                                                                                                                                                                                                                    |

SCHOLARONE™  
Manuscripts

**TITLE: EMPOWERING HEALTHCARE PROVIDERS THROUGH SMOKING CESSATION TRAINING IN MALAYSIA: A PRE- AND POST-INTERVENTION EVALUATION ON THE IMPROVEMENT OF KNOWLEDGE, ATTITUDE & SELF-EFFICACY.**

**SITI IDAYU HASAN<sup>1,4</sup>, FARIZAH MOHD HAIRI<sup>1,4</sup> AMANI @ NATASHA AHMAD TAJUDDIN<sup>2,4</sup> & AMER SIDDIQ AMER NORDIN<sup>3,4</sup>,**

<sup>1</sup>Department of Social & Preventive Medicine, Faculty of Medicine, University of Malaya, Lembah Pantai, Kuala Lumpur, Malaysia.

<sup>2</sup>Department of Primary Care Medicine, Faculty of Medicine, University of Malaya, Lembah Pantai, Kuala Lumpur, Malaysia.

<sup>3</sup>Department of Psychological Medicine, Faculty of Medicine, University of Malaya, Lembah Pantai, Kuala Lumpur, Malaysia.

<sup>4</sup>Nicotine Addiction Research Group UMCAS, University of Malaya, Jalan Pantai Baharu, Kuala Lumpur, Malaysia.

**Authors:**

Department of Social & Preventive Medicine, Faculty of Medicine, University of Malaya, Lembah Pantai, 50603 Kuala Lumpur, Malaysia.  
Siti Idayu Hasan, PhD student, University of Malaya.

Department of Social & Preventive Medicine, Faculty of Medicine, University of Malaya, Lembah Pantai, 50603 Kuala Lumpur, Malaysia.  
Farizah Mohd Hairi, Associate Professor/Public Health Physician & Consultant, University of Malaya.

Department of Primary Care Medicine, Faculty of Medicine, University of Malaya, Lembah Pantai, 50603 Kuala Lumpur, Malaysia.  
Amani @ Natasha Ahmad Tajuddin, Family Medicine Specialist, University of Malaya.

Department of Psychological Medicine, Faculty of Medicine, University of Malaya, Lembah Pantai, 50603 Kuala Lumpur, Malaysia.  
Amer Siddiq Amer Nordin, Associate Professor/Consultant Psychiatrist and Addiction Medicine Specialist.

**Correspond to:** Farizah Mohd Hairi at farizah@um.edu.my

**Word count: 4489**

**References count: 55**

## Abstract

Objectives: Healthcare providers sit in an ideal position to advise their patients to quit smoking by providing effective smoking cessation intervention. Thus, we evaluate the effectiveness of a one-day training program in changing the knowledge, attitude and self-efficacy of healthcare providers in smoking cessation intervention.

Methods: A pre-post study design was conducted in 2017. Eight-hour Smoking Cessation Organizing, Planning & Execution (SCOPE) training comprised of lectures, practical session and role-play session was offered to 218 healthcare providers. A validated evaluation tool, ProSCiTE was administered to assess the impact of training on knowledge, attitude, and self-efficacy on smoking cessation intervention.

Results: After SCOPE training, knowledge score significantly increased from  $7.96 \pm 2.34$  to  $10.35 \pm 1.57$  ( $p < 0.001$ ). Attitude and self-efficacy in smoking cessation intervention also increased significantly from  $34.32 \pm 4.12$  to  $37.04 \pm 3.92$  ( $p < 0.001$ ) and  $40.31 \pm 8.61$  to  $54.67 \pm 7.45$  ( $p < 0.001$ ) respectively. Pre- and post-training scores was significantly improved for all professions and each measure particularly in self-efficacy.

Conclusion: This study demonstrates that SCOPE training could improve healthcare providers' knowledge, attitude and self-efficacy on smoking cessation intervention. Future training is recommended to equip healthcare providers with current knowledge, right attitude and high self-efficacy to successfully integrate what they have learned into their practice.

Keywords: program evaluation, smoking cessation, healthcare providers, knowledge, attitude, self-efficacy

## Strengths and limitations of this study

- This study's novelty, as this is the first study documented the changes in multidiscipline healthcare providers (doctors, pharmacists, nurses and medical assistants) on knowledge, attitude and self-efficacy to deliver smoking cessation intervention following an eight-hour SCOPE training with combination of lectures, practical, and role-play sessions.
- Since all healthcare providers were invited, there was a risk of selection bias, and there are inherent risks for inaccuracies when relying on self-reported data.
- The sample was drawn from three out of 14 states in Malaysia, thus generalizability towards the whole population should be cautious.
- The nature of pre- and post-study lacks control group for the intervention and without long term follow up does not indicate causal relationship between the impact of the training on the actual healthcare providers' behaviour and smoking cessation outcome.

## Introduction

Tobacco use is one of the leading preventable cause of death and disease globally. Approximately, six million people die from tobacco related diseases every year which translates into one in 10 deaths among adult worldwide.<sup>1</sup> More than 600,000 people die each year from exposure to second hand smoke and it is estimated that by 2030, the annual death toll could rise to eight million.<sup>1</sup> The Surgeon General on "The Health Consequence of Smoking – 50 Years of Progress" 2014 report concluded that smoking can cause cancer, respiratory disease, cardiovascular disease, reproductive disease, dental disease, inflammatory bowel disease, diabetes and autoimmune disease.<sup>2</sup> Cochrane reviews provided concrete evidence that stopping smoking could reduce smoking related diseases.<sup>3</sup> More importantly, offering help to quit smoking by healthcare providers has been proven to be an effective strategy to combat tobacco related problem. Increasing the amount of behavioural support by healthcare providers is likely to increase the chance of success by about 10%-25%.<sup>4</sup>

Healthcare providers are in an ideal position to advise patients to quit smoking by providing effective brief intervention. Among all the healthcare providers, pharmacists play a major role in smoking cessation as they are easily accessible by the public,<sup>5</sup> able to provide counselling without prior appointment and with no additional cost to the patients.<sup>6</sup> In addition, they communicate regularly with patients when advising correct use of nicotine replacement therapy (NRT) products. Pharmacists receiving online training followed by role-play session can counsel excellently for smoking cessation.<sup>7</sup> A study by Cornuz in Switzerland showed that non-pharmacological smoking cessation interventions with active learning methods and practice with standardized patients by doctors produce better abstinence rate, provide better counselling and have higher number of smoker's willing to quit compared with other healthcare providers.<sup>8</sup> On the other hand, nurses are well-positioned to deliver effective smoking cessation intervention with minimal investment in training. A one-hour training of smoking

1  
2  
3 cessation has shown a significant increase in knowledge and attitude compared to prior  
4 training.<sup>9</sup> Family physicians also have significant opportunity to decrease smoking rate as they  
5 are well suited to offer effective counselling to their patients. First, they already have some  
6 knowledge about their patients and social environment. Second, there is already a good  
7 rapport between family doctors and their patients that will contribute to the therapeutic  
8 relationship. Third, most of the patients often come to family doctors believe that doctors can  
9 help them improve their condition.<sup>10</sup>  
10  
11  
12  
13  
14  
15  
16  
17  
18  
19  
20  
21

22 In order to tackle serious health problems arising from smoking, all healthcare providers are  
23 encouraged to be actively involved in smoking cessation services. The U.S. Public Health  
24 Service has recommended the use of Clinical Practice Guidelines (CPG) for tobacco  
25 cessation. The tobacco cessation clinical practice guideline is a brief intervention known by  
26 the acronym of the "5 A's" and has been effective in both research and clinical practice.<sup>11 12</sup>  
27 Increasing the implementation of CPG by various healthcare providers is likely to lead to more  
28 smokers exposed to evidence-based treatments, more smokers quitting and reduce the  
29 prevalence of smoking and smoking-related disease.<sup>11</sup> Despite many evidence that shows the  
30 effectiveness of brief interventions even in a busy clinical environment, yet dissemination is  
31 very slow and there are still many healthcare providers who do not follow the CPG.<sup>13</sup>  
32 Healthcare providers reported they performed the first two "A"s which are "Ask" and  
33 "Advise".<sup>14</sup> However, not many evidences report on the performance on the three remaining  
34 steps which are "Assess", "Assist" and "Arrange".<sup>15</sup> According to the National Ambulatory  
35 Medical Care Survey between 2001 – 2004, 32% of patient charts did not include their  
36 smoking status, more than 80% of smokers did not receive assistance and only 0.3% and  
37 1.8% received Nicotine Replacement Therapy (NRT) and bupropion treatments,  
38 respectively.<sup>16</sup> Only 19.8% of current smokers received any cessation assistance either  
39 counselling, medication or both. Even at preventive care visit, only 28.9% received cessation  
40 assistance.<sup>17</sup> Like many other countries, Malaysia is also facing challenges in tobacco control.  
41  
42  
43  
44  
45  
46  
47  
48  
49  
50  
51  
52  
53  
54  
55  
56  
57  
58  
59  
60

1  
2  
3 The trend of smoking prevalence captured by Global Adult Tobacco Survey 2011 and 2015  
4 showed slight decrease in overall (from 23.1% to 22.8%) and among male (from 43.9% to  
5 43.0%) prevalence of current smokers. However, the prevalence of smoking among women  
6 has increased (from 1.0% to 1.4%). Additionally, under smokeless tobacco there is a high  
7 increase and is suspected to be due to the use of electronic cigarettes.<sup>18 19</sup> In addition, the  
8 increase in smoking prevalence among girls as documented by the Global Youth Tobacco  
9 Survey in 2003 and 2009 should also be noted. Based on the recent Malaysian National Health  
10 and Morbidity Survey 2011, 67.6% of the current smokers who visited healthcare services in  
11 the past 12 months was asked about their smoking status and 52.6% was advised to quit  
12 smoking by healthcare providers.<sup>19</sup> In 2015, 75.4% of the current smokers who visited  
13 healthcare services in the past 12 months was advised to quit smoking by healthcare  
14 providers.<sup>18</sup> Unfortunately, no evidence on healthcare providers performing the three  
15 remaining steps has been documented.

16  
17  
18 In addition, translating this guideline into practice remains a challenge because nicotine  
19 dependence is a chronic relapsing condition<sup>11</sup> that requires continuous effort over time to  
20 achieve success therefore preventing relapse. Although in many countries, more than half of  
21 the current smokers want to quit smoking, and one-third had made at least three quit attempts,  
22 less than half of smokers succeed in quitting smoking before the age of 60<sup>18-22</sup>. A number of  
23 barriers to intervene smokers has been discussed in the previous literatures including lack of  
24 knowledge, negative healthcare providers' attitude, low self-efficacy, lack of training,<sup>23</sup>  
25 competing priorities and believing that counselling was not an appropriate service,<sup>24</sup> barriers  
26 of time, manpower and finance, lack of skills, concern for the clinician-patient relationship and  
27 perception of insufficient patient motivation, intervention rate are low.<sup>25</sup> Smoking among  
28 healthcare providers also has been prevalent in many countries and those who smoked were  
29 less likely to advise patients to stop smoking.<sup>26</sup> Healthcare providers also claimed that they  
30 lack knowledge in smoking cessation counselling techniques and confidence in smoking

1  
2  
3 cessation program.<sup>27</sup> The most significant barrier in providing smoking cessation intervention  
4 reported by previous study is due to limited training of healthcare providers.<sup>3 8 28</sup> Thus, to  
5 ensure successful and effective intervention, healthcare providers require knowledge, good  
6 attitude and intervention skill to help smokers to overcome the ambivalence to change and  
7 guide them to provide appropriate counselling and pharmacotherapy treatments.<sup>15</sup>  
8  
9  
10  
11  
12

13  
14  
15 According to the 4<sup>th</sup> Edition of Tobacco Atlas, doctors often informed patients about the harmful  
16 effect of smoking but they lack in smoking cessation behavioural and pharmacotherapy  
17 intervention training to help their patients to stop using tobacco products.<sup>29</sup> Therefore, there is  
18 a gap between the needs of the patients and the actual ability of the healthcare providers to  
19 help them.<sup>20</sup> In order to taper the gap, various trainings including face-to-face and online  
20 trainings have been developed to improve smoking cessation competency and proficiency.  
21 These training programs have shown to be effective in enhancing the counselling knowledge,  
22 skills and confidence of healthcare providers and their performance in smoking cessation  
23 intervention.<sup>9 30-34</sup> Meta-analyses by Cochrane Collaboration also showed healthcare  
24 providers who received specific training had higher probability of performing smoking  
25 cessation intervention to help their patients to stop smoking compared to their untrained  
26 controls counterparts.<sup>3 8</sup> Unfortunately, evidence suggest that very minimal number of  
27 healthcare providers have received even minimal training on smoking cessation treatment.<sup>35</sup>  
28  
29  
30  
31  
32  
33  
34  
35  
36  
37  
38  
39  
40  
41  
42  
43  
44  
45

46 Article 14 of the World Health Organisation (WHO) Framework Convention on Tobacco  
47 Control (FCTC) states that “each Party shall develop and disseminate appropriate,  
48 comprehensive and integrated guidelines based on scientific evidence and best practices,  
49 taking into account national circumstances and priorities, and shall take effective measures to  
50 promote cessation of tobacco use and adequate treatment for tobacco dependence”.<sup>36</sup> One  
51 of the key resources needed to implement Article 14 is sufficient numbers of healthcare  
52 providers trained to assess tobacco use and deliver brief advice about smoking cessation.<sup>37</sup>  
53  
54  
55  
56  
57  
58  
59  
60



1  
2  
3 In line with this, Malaysia has developed a National Strategic Plan for Tobacco Control to  
4 achieve tobacco free nation by 2045 with the target of less than 5% tobacco use prevalence.  
5  
6 Currently, a smoking cessation training program called “Smoking Cessation Organizing,  
7  
8 Planning & Execution (SCOPE)” has been successfully developed and introduced since 2009  
9  
10 by a group of researchers from Nicotine Addiction Research Group of University of Malaya  
11  
12 Centre for Addiction Sciences (UMCAS). SCOPE is part of mQuit services recognized as one  
13  
14 of the three pathways to become a certified smoking cessation provider in Malaysia.<sup>38</sup> Since  
15  
16 majority of the primary care providers play an important role as front liners in promoting  
17  
18 smoking cessation and offering support to tobacco users, the SCOPE module has been  
19  
20 designed for different disciplines of healthcare providers (e.g., doctors, dentists, pharmacists,  
21  
22 nurses, medical assistants) to increase knowledge and best practices in smoking cessation in  
23  
24 Malaysia.<sup>38</sup> Evidence suggest that, intervention delivered by any single type of healthcare  
25  
26 providers (e.g., doctors, dentists, nurses, psychologists) or multiple healthcare providers  
27  
28 improve abstinence rate compared with no intervention without healthcare providers (e.g.,  
29  
30 self-help).<sup>11</sup> Higher cessation rate will be achieved with more intensive and frequent contacts  
31  
32 with healthcare providers.<sup>4</sup> Thus, the purpose of this study was to assess the pre- and post-  
33  
34 training results from a series of eight-hour SCOPE training on smoking cessation. We  
35  
36 hypothesized that the training would increase smoking cessation-related knowledge, attitude  
37  
38 and self-efficacy for all disciplines of healthcare providers including doctors, pharmacists,  
39  
40 medical assistants and nurses.  
41  
42  
43  
44  
45  
46  
47  
48

## 49 Methods

### 50 51 52 **Development of SCOPE training**

53  
54 SCOPE is a comprehensive, one-day program developed from previous study ‘Empowering  
55  
56 Dentist into Smoking Cessation Program’ (2009 -2013) by Nicotine Addiction Research Group  
57  
58 of UMCAS team where the need to offer intensive smoking cessation counselling was found  
59  
60

1  
2  
3 to be important.<sup>39</sup> The module was primarily developed by two authors – ASAN, a Psychiatrist  
4 and Addiction Medicine Specialist and FMH, a Public Health Specialist and Tobacco Control  
5 Expert. The module was reviewed and vetted by local and international experts to strengthen  
6 the content. The primary aim of the SCOPE training was to prepare healthcare providers to  
7 be competent and confident to assist smokers to quit through evidence-based smoking  
8 cessation treatment.  
9  
10  
11  
12  
13  
14  
15  
16  
17  
18

19 The content of the training includes knowledge on the basic science of tobacco use and clinical  
20 science of tobacco treatment. This training outlined three components including interactive  
21 lectures (questions and answer sessions, video presentation and quiz), practical session and  
22 role-play demonstration. The lectures consist of the following topics: Introduction, Tobacco  
23 control and policy, National strategic plan, Harm to health, Smoking as an addiction,  
24 Pharmacological therapy and Behavioural therapy in smoking cessation. Practical session and  
25 assessment on how to use tobacco dependence instrument, Fagerstrom Test Nicotine  
26 Dependence (FTND) and how to monitor carbon monoxide level using smokerlyser as well as  
27 on how to run the quit smoking clinic was also included in this training. The goal of role-play  
28 session was to provide participants with guided, hands-on practise in addressing tobacco  
29 treatment for patients. A forty-five minutes session of role-play representing various cases of  
30 tobacco treatment with three different scenarios (for example, patient at different level of  
31 stages of change – pre-contemplation, contemplation, preparation, action and maintenance).  
32 Role-play was based on 5 A's counselling approach where the participants acted as smoking  
33 cessation providers, and the facilitator acted as a patient. Afterwards, the facilitators led a brief  
34 discussion on healthcare providers-delivered tobacco treatment challenges.  
35  
36  
37  
38  
39  
40  
41  
42  
43  
44  
45  
46  
47  
48  
49  
50  
51  
52  
53  
54  
55

56 Education materials provided to the healthcare providers included digital and print copies of  
57 SCOPE handbook. A copy of screening tool for nicotine dependence, Fagerstrom test and  
58  
59  
60

1  
2  
3 smokerlyser chart for monitoring carbon monoxide level in the lung was given to each  
4  
5 healthcare provider to facilitate the process of smoking cessation intervention. Healthcare  
6  
7 providers attended only one training session led by ASAN or FMH without booster sessions,  
8  
9 reminder or other follow up training sessions.  
10

### 11 12 13 14 15 **Study design and participants**

16  
17  
18 A pre-post study design was conducted among healthcare providers who attended the 8-hour  
19  
20 SCOPE training over a period of three months starting from December 2016 to February 2017.  
21  
22 The study population comprised of a group of healthcare providers with different grades and  
23  
24 specialities working at government health clinics in Malaysia. A total of 218 healthcare  
25  
26 providers who completed the training and returned the pre- and post-survey were included in  
27  
28 this study. The healthcare providers consist of medical doctors (n=98), medical assistants  
29  
30 (n=44), pharmacists (n=42) and nurses (n=34).  
31  
32  
33  
34  
35

### 36 **Evaluation tool**

37  
38  
39 A validated evaluation tool called ProSCiTE (supplementary file) was administered to the  
40  
41 participants before and after training program.<sup>40 41</sup> ProSCiTE is an acronym for Provider's  
42  
43 Smoking Cessation Training Evaluation. ProSCiTE was originally developed and validated by  
44  
45 SIH. It consists of 67 items which is divided into five main constructs including knowledge (12  
46  
47 items), attitude (8 items), self-efficacy (13 items), behaviour (19 items) and barriers (15 items)  
48  
49 on smoking cessation intervention. However, only demographic background and three  
50  
51 constructs (knowledge, attitude and self-efficacy) was measured in this study to determine the  
52  
53 immediate impact of SCOPE training. Demographic characteristics assessed were age,  
54  
55 gender, education level, working experience, smoking status and type of profession.  
56  
57 Knowledge is *an information, understanding or skill that healthcare providers get from*  
58  
59 *experience or education*. Knowledge on smoking cessation withdrawal symptoms was  
60

1  
2  
3 assessed with 12 items with Yes (1) or No (0) response which yielded a total maximum score  
4 of 12. Attitude is *the tendency, based on trust and experience, to respond to smoking*  
5 *cessation intervention with specific methods and approaches.* Attitude was assessed using  
6 eight items rated by a five-point Likert scale from strongly disagree (1), disagree (2), neither  
7 disagree/agree (3), agree (4) and strongly agree (5) which yielded a total maximum score of  
8 40. Self-efficacy is *one's belief in one's ability to succeed in specific situations or accomplish*  
9 *a task in smoking cessation intervention.* Self-efficacy was assessed using 13 items by a five-  
10 point Likert scale from certainly not (1), probably not (2), neutral (3), probably (4) and certainly  
11 (5), which yielded a total maximum score of 65. Construct validity based on eigenvalues and  
12 factor loadings to confirm the factor structure (knowledge, attitude, self-efficacy) was  
13 acceptable. The internal consistency reliability of factor construct was excellent for knowledge  
14 ( $\alpha = 0.93$ ) and self- efficacy ( $\alpha = 0.93$ ) and good for attitude (0.88).<sup>41</sup>  
15  
16  
17  
18  
19  
20  
21  
22  
23  
24  
25  
26  
27  
28  
29  
30  
31

## 32 **Study procedures**

33  
34 A representative sample from each health clinic was randomly selected from the list of  
35 healthcare providers provided by the State Health Department. The eligible healthcare  
36 providers including local healthcare providers working in government sector and never  
37 attended SCOPE training were invited and scheduled for this study. The participation in this  
38 study was on voluntary basis. They were explained regarding the purpose of the study before  
39 the training was conducted. The providers were awarded with Continuing Professional  
40 Development (CPD) credit after completing the training. The pre-test survey was administered  
41 immediately before the training and a post-test survey was administered immediately after the  
42 training.  
43  
44  
45  
46  
47  
48  
49  
50  
51  
52  
53  
54  
55  
56

## 57 **Ethical approval**

1  
2  
3 This study was approved by the Medical Ethics Committee of University of Malaya (Reference  
4 number: UM.TNC2/RC/H&E/UMREC-118) and of the Ministry of Health Malaysia (Reference  
5 number: NMRR-16-2144-32353 (IIR)). Healthcare providers were informed, and they gave  
6 consent before the pre-training survey prior to the SCOPE training.  
7  
8  
9  
10

### 11 12 13 14 15 **Data analysis**

16  
17  
18 Data were analysed with IBM SPSS version 22. Descriptive analyses were performed on the  
19 demographic items. Paired samples t-tests were used to compare pre- and post-test results.  
20  
21 The level of statistical significance was set to  $p < 0.05$  for all analyses.  
22  
23  
24  
25  
26  
27

### 28 **Patient and public involvement**

29  
30 This is a pre- and post-study from different disciplines of healthcare providers including  
31 doctors, pharmacists, medical assistants and nurses. Therefore, there is no patient  
32 involvement in this study. All eligible healthcare providers were briefed on the purpose of the  
33 study, benefit of the study and potential harm for them. The study findings will be disseminated  
34 through academic publications and presentations, newspapers, printed and digital media,  
35 media interview and presentation to Ministry of Health Malaysia.  
36  
37  
38  
39  
40  
41  
42  
43  
44  
45  
46

## 47 **Results**

### 48 49 50 **Healthcare provider characteristics**

51  
52 Nearly half of the healthcare providers were doctors. Their mean age was 32.59 (6.69) ranging  
53 from 23 to 55 years old. Almost two quarters were female and almost half of them obtained  
54 bachelor's degree. Majority of the healthcare providers have working experience more than  
55  
56  
57  
58  
59  
60

1  
2  
3 seven years. Majority of them reported that they are non-smokers and there are no current  
4  
5 smokers in all profession except for medical assistant. (See Table 1).  
6  
7  
8  
9  
10  
11  
12  
13  
14  
15  
16  
17  
18  
19  
20  
21  
22  
23  
24  
25  
26  
27  
28  
29  
30  
31  
32  
33  
34  
35  
36  
37  
38  
39  
40  
41  
42  
43  
44  
45  
46  
47  
48  
49  
50  
51  
52  
53  
54  
55  
56  
57  
58  
59  
60

For peer review only

Table 1: Healthcare providers' characteristics

| Variable           | All trainees | Nurses       | Medical Assistant | Doctors      | Pharmacists  |
|--------------------|--------------|--------------|-------------------|--------------|--------------|
| Total trainees     | n (%)        | n (%)        | n (%)             | n (%)        | n (%)        |
|                    | 218 (100)    | 34 (15.60)   | 44 (20.2)         | 98 (44.9)    | 42 (19.3)    |
| Age (years old)    | 32.59 (6.69) | 32.64 (8.03) | 29.47 (4.58)      | 35.21 (7.09) | 29.67 (2.91) |
| Mean (SD)          |              |              |                   |              |              |
| Working experience | 7.26 (5.80)  | 8.56 (7.57)  | 5.25 (3.90)       | 8.83 (96.29) | 4.64 (1.95)  |
| Mean (SD)          |              |              |                   |              |              |
| Gender             |              |              |                   |              |              |
| Male               | 77 (35.3)    | 2 (5.9)      | 40 (90.9)         | 27 (27.6)    | 8 (19.0)     |
| Female             | 141 (64.7)   | 32 (94.1)    | 4 (9.1)           | 71 (72.4)    | 34 (81.0)    |
| Ethnicity          |              |              |                   |              |              |
| Malay              | 181 (83.0)   | 33 (97.1)    | 43 (97.7)         | 77 (78.6)    | 28 (66.7)    |
| Chinese            | 16 (7.3)     | 0            | 0                 | 7 (7.1)      | 9 (21.4)     |
| Indian             | 21 (9.6)     | 1 (2.9)      | 1 (2.3)           | 14 (14.3)    | 5 (11.9)     |
| Religion           |              |              |                   |              |              |
| Muslim             | 179 (82.1)   | 33 (97.1)    | 43 (97.7)         | 76 (77.6)    | 27 (64.3)    |
| Buddhist           | 8 (3.7)      | 0            | 0                 | 2 (2.0)      | 6 (14.3)     |
| Christian          | 12 (5.5)     | 0            | 0                 | 7 (7.1)      | 5 (11.9)     |
| Hindu              | 19 (8.7)     | 1 (2.9)      | 1 (2.3)           | 13 (13.3)    | 4 (9.5)      |
| Education          |              |              |                   |              |              |
| Diploma            | 73 (33.5)    | 32 (94.1)    | 40 (90.9)         | 1 (1.0)      | 0            |
| Bachelor           | 100 (45.9)   | 2 (5.9)      | 4 (9.1)           | 60 (61.2)    | 34 (81.0)    |
| Master             | 45 (20.6)    | 0            | 0                 | 37 (37.8)    | 8 (19.0)     |
| Smoking* status    |              |              |                   |              |              |
| Current smokers    | 6 (2.8)      | 0            | 6 (13.6)          | 0            | 0            |
| Former smokers     | 18 (8.4)     | 1 (3.1)      | 12 (27.3)         | 5 (5.2)      | 0            |
| Non-smokers        | 191 (88.8)   | 31 (96.9)    | 26 (59.1)         | 92 (94.8)    | 42 (100.0)   |

n, frequency; %, percentage; \*n, 215; diploma, In the Malaysia context, diploma is a qualification obtained during tertiary education and minimum qualification to be employed as nurse or medical assistants in the government sector. It is of a level below the bachelor's degree qualification.

## Changes in knowledge, attitudes and self-efficacy on smoking cessation intervention due to training

A paired t-test was performed to compare the pre- and post-training scores. Participants' post-training average scores on knowledge were 2.39 points higher compared to their pre-training scores (95% CI 2.25, 0.16). The difference was statistically significant,  $t(206) = 15.32$ ,  $p < 0.001$ , and large,  $d = 1.3$ . Each item in knowledge significantly increased after the training. It was also found that healthcare providers' knowledge on mouth ulcers as a withdrawal symptom for nicotine addiction gains the greatest change in score followed by diarrhoea. Before the training, most of healthcare providers did not know that diarrhoea was one of the withdrawal symptoms for nicotine addiction. (See Table 2).

Table 2: Paired sample t-test comparing pre- and post-tests for each item and total knowledge score.

| Variables                     | Pre-training Mean (SD) | Post-training Mean (SD) | p-value          |
|-------------------------------|------------------------|-------------------------|------------------|
| 1. Irritability               | 0.99 (0.10)            | 1.16 (0.50)             | <0.001           |
| 2. Depression                 | 0.98 (0.15)            | 1.34 (0.60)             | <0.001           |
| 3. Restlessness               | 0.99 (0.10)            | 1.05 (0.30)             | 0.006            |
| 4. Poor concentration         | 0.99 (0.12)            | 1.12 (0.43)             | <0.001           |
| 5. Increased appetite         | 0.85 (0.36)            | 1.55 (0.61)             | <0.001           |
| 6. Weight gain                | 0.82 (0.38)            | 1.56 (0.63)             | <0.001           |
| 7. Light headedness           | 0.96 (0.20)            | 1.26 (0.59)             | <0.001           |
| 8. Night time awakening       | 0.90 (0.30)            | 1.49 (0.72)             | <0.001           |
| 9. Constipation               | 0.84 (0.37)            | 1.74 (0.78)             | <0.001           |
| 10. Diarrhea                  | 0.27 (0.45)            | 2.01 (0.68)             | <0.001           |
| 11. Mouth ulcers              | 0.80 (0.40)            | 1.86 (0.69)             | <0.001           |
| 12. Urge to smoke             | 0.98 (0.15)            | 1.07 (0.32)             | 0.001            |
| <b>Total knowledge scores</b> | <b>7.96 (2.34)</b>     | <b>10.35 (1.57)</b>     | <b>&lt;0.001</b> |

SD, standard deviation; Knowledge items were measured by Yes (1) or No (0) with a total maximum score of 12.

Before the training, the mean score of total attitudes was acceptable while after completing the training, the mean score of total attitudes increased to maximum score. On the average,



participant's post-training score was 2.72 points higher than their pre-training score (95% CI 2.07, 3.37). The difference was statistically significant,  $t(201) = 8.23$ ,  $p = <0.001$ , and medium,  $d = 0.68$ . Each item in attitude significantly increased after the training. Attitude of healthcare providers towards patients want them to advise patients to stop using any tobacco products gained the greatest change in score followed by patient chance of quitting smoking increases if the healthcare provider advises patients to quit. Before the training, it showed that attitude towards asking parents/guardian on the effect of second-hand smoke were lowest. However, after the training, the attitude towards second-hand smoke increased. (See Table 3).

Table 3: Paired sample t-test comparing pre- and post-tests for each item and total attitude score.

| Items                                                                                                   | Pre-training Mean (SD) | Post-training Mean (SD) | p-value          |
|---------------------------------------------------------------------------------------------------------|------------------------|-------------------------|------------------|
| 1. A patient's chance of quitting smoking increases if the healthcare provider advises him/her to quit. | 3.85 (0.89)            | 4.52 (0.67)             | <0.001           |
| 2. Patients want you to advise them to stop using any tobacco products.                                 | 3.59 (0.86)            | 4.34 (0.75)             | <0.001           |
| <b>Healthcare providers like you should....</b>                                                         |                        |                         |                  |
| 3. Get specific training on smoking cessation counselling techniques.                                   | 4.56 (0.60)            | 4.72 (0.57)             | 0.002            |
| 4. Set a good example for their patients and public by not using any tobacco products.                  | 4.64 (0.58)            | 4.75 (0.55)             | 0.029            |
| 5. Routinely ask patients/clients about tobacco use.                                                    | 4.38 (0.66)            | 4.69 (0.59)             | 0.006            |
| 6. Routinely ask parents/guardians about tobacco use during pediatric visits.                           | 4.29 (0.75)            | 4.61 (0.7)              | <0.001           |
| 7. Routinely advise patients/clients who use any tobacco products to quit.                              | 4.49 (0.650)           | 4.72 (0.59)             | <0.001           |
| 8. Routinely assist patients using any tobacco products to quit.                                        | 4.52 (0.64)            | 4.71 (0.60)             | 0.001            |
| <b>Total Attitude scores</b>                                                                            | <b>34.32 (4.12)</b>    | <b>37.04 (3.92)</b>     | <b>&lt;0.001</b> |

SD, standard deviation; Attitude items were measured by using a 5-point Likert scale strongly disagree (1), disagree (2), neither disagree/agree (3), agree (4) and strongly agree (5) with a total maximum score of 40.

A significant increase in healthcare providers' self-efficacy was also found when pre- and post-training was compared. Amongst the three measures, self-efficacy scores provide greatest changes after the training. On the average, healthcare providers' post-training score was

14.36 points higher than their pre-training score, 95% CI (0.63, 0.84). The difference was statistically significant,  $t(205) = 23.22$ ,  $p < 0.001$ , and large,  $d = 1.78$ . Each item in self-efficacy significantly increased after the training. Practical and assessment module on how to detect carbon monoxide in their breath using a smokerlyser depicted greatest change in score followed by pharmacological therapy to assist smokers to quit and behavioral therapy to prescribe medication to treat smokers. Healthcare providers have lowest confidence in using the smokerlyser before the training. However, it showed greater improvement from the practical session in the training. (See Table 4)

Table 4: Paired sample t-test comparing pre- and post-tests for each item and total self-efficacy score

| Items                                                                                                                               | Pre-training Mean (SD) | Post-training Mean (SD) | p-value          |
|-------------------------------------------------------------------------------------------------------------------------------------|------------------------|-------------------------|------------------|
| 1. I know appropriate questions to ask my patients.                                                                                 | 3.78 (0.84)            | 4.45 (0.60)             | <0.001           |
| 2. I am able to motivate my patients who are interested to quit smoking.                                                            | 3.85 (0.81)            | 4.40 (0.62)             | <0.001           |
| 3. I am able to assist patients to quit even if the patient thinks that it is difficult to give up.                                 | 3.68 (0.81)            | 4.27 (0.65)             | <0.001           |
| 4. I have the pharmacological therapy skills to assist patients to quit smoking.                                                    | 3.35 (1.06)            | 4.15 (0.87)             | <0.001           |
| 5. I have the behavioral therapy skills to assist patients to quit smoking.                                                         | 3.28 (0.96)            | 4.14 (0.72)             | <0.001           |
| 6. I can advise patients to consider smoking cessation.                                                                             | 4.14 (4.14)            | 4.50 (0.56)             | <0.001           |
| 7. I can provide counselling when time is limited.                                                                                  | 3.18 (0.97)            | 3.89 (0.94)             | <0.001           |
| 8. I can counsel patients who are not interested in quitting.                                                                       | 3.31 (0.94)            | 4.05 (0.82)             | <0.001           |
| 9. I know how to prescribe medication (nicotine replacement therapy/bupropion) to treat tobacco dependency.                         | 2.93 (1.26)            | 3.81 (1.07)             | <0.001           |
| 10. I can assess patient's different stages of readiness to quit smoking.                                                           | 3.50 (0.96)            | 4.17 (0.75)             | <0.001           |
| 11. I can assess patient's level of nicotine dependency using the Fagerstrom test.                                                  | 3.43 (1.21)            | 4.30 (0.86)             | <0.001           |
| 12. I can use smokerlyzer to determine patient's carbon monoxide level.                                                             | 2.63 (1.34)            | 4.28 (1.07)             | <0.001           |
| 13. I can assist recent quitters to learn how to cope with situations or triggers that might lead them to relapse to using tobacco. | 3.37 (1.02)            | 4.28 (0.70)             | <0.001           |
| <b>Total Self-efficacy scores</b>                                                                                                   | <b>40.31 (8.61)</b>    | <b>54.67 (7.45)</b>     | <b>&lt;0.001</b> |

SD: standard deviation; Self-efficacy items were measured by using a five-point Likert scale from certainly not (1), probably not (2), neutral (3), probably (4) and certainly (5), with a total maximum score of 65.

## Changes in knowledge, attitudes and self-efficacy on smoking cessation intervention due to training for each profession

Paired sample t-test in Figure 1 revealed significant increases in all four professions and measures. Nurses obtain the largest changes for knowledge score with an increase of 2.76 points, followed by medical assistants (2.72), doctors (2.28) and pharmacists (2.05). On the attitude, medical assistants gain the largest changes with an increase of 2.87 points, followed by doctors (2.75), pharmacist (2.62) and nurses (2.58). Similar result was also found for self-efficacy, where nurses gain the largest changes with an increase of 15.24 points, followed by doctors (15.01), pharmacists (14.71) and medical assistants (11.69).

Post-training results showed that doctors and pharmacists obtain the highest score for knowledge, pharmacists for attitude and doctors for self-efficacy. Lowest score for nurses and medical assistant were seen in both pre-training and post-training for all measure.

## Discussion

This study established an evaluation of a tailored-smoking cessation training for healthcare providers based on lecture, practical and role-play. Our study showed significant improvement in healthcare providers' knowledge, attitude and self-efficacy in smoking cessation intervention. Importantly this was also the first evaluation of such training intervention among healthcare providers using the 5 A's approach in the Malaysian context. This study also indicate that knowledge, attitude and self-efficacy did not differ much among the different disciplines of healthcare providers and significantly improved as a result of their participation in SCOPE training. Prior to the training, pharmacists had higher score on both knowledge and attitude while doctors had higher score on self-efficacy related to smoking cessation. After the training, a higher knowledge score obtained by both pharmacists and doctors, attitude score by pharmacists and self-efficacy score by doctors. Although nurses and medical assistants

1  
2  
3 had slightly lower score for each measure, however, they gain the largest change after the  
4 training. The gaps in baseline score among medical assistants and nurses indicated that these  
5 groups had minimal exposure on smoking cessation prior to the training. This finding is also  
6 in line with a study in Arkansas, United States, where they found that nurses' score on  
7 knowledge and self-efficacy was lower than doctors.<sup>13</sup> The results from this study suggested  
8 that training in smoking cessation is effective in the short term and can provide better  
9 knowledge, positive attitude and improve their confidence level in assisting smokers in quitting  
10 smoking using the 5A's smoking cessation intervention particularly among the nurses and  
11 medical assistants. This study is consistent with international findings that have demonstrated  
12 smoking cessation training can be effective in providing smoking cessation intervention.<sup>3 9 42-</sup>

45

26  
27  
28  
29  
30 In this present study, significant improvement in knowledge, attitude and self-efficacy were  
31 found after the SCOPE training. It is in agreement with previous studies in which healthcare  
32 providers have reported improvements in knowledge, attitude and self-efficacy in smoking  
33 cessation intervention after training.<sup>46-49</sup> This study suggests that the smoking status among  
34 SCOPE participants is important, whereby there are no current smokers among the doctors,  
35 pharmacists and the nurses groups. When compared with a study conducted in Bosnia  
36 Herzegovina, where there is no established smoking cessation program yet, more than half of  
37 the nurses who worked at the Family Medicine teaching centre smoke, and about 40% of their  
38 doctors smoke. The ever smokers among these professionals would most likely not advocate  
39 their patients for smoking cessation despite agreeing that smoking is harmful to health and  
40 would not advise young adults to start smoking.<sup>50</sup> Previous studies also reported that non-  
41 smokers healthcare providers had more positive attitude towards the hospital's smoke-free  
42 policy compared to smokers.<sup>51 52</sup> With the SCOPE program, in the attitude component, the  
43 training has improved their attitude towards advocating and advising patients to stop smoking.  
44 This evidently showed the importance of having a structured and well-organized smoking  
45  
46  
47  
48  
49  
50  
51  
52  
53  
54  
55  
56  
57  
58  
59  
60

1  
2  
3 cessation program, to better assist healthcare providers in Malaysia in helping patients to quit  
4 smoking. When participants were asked to give their responses regarding their attitude  
5 towards providing smoking cessation intervention to their patients, it showed significant  
6 improvement post training particularly for second-hand smoke. This evidence supports  
7 healthcare providers are aware on the importance of identifying and advising patients on the  
8 harmful effect of second-hand smoke. More positive attitude particularly among medical  
9 assistants which was observed after the training also suggested that our healthcare providers  
10 are aware of their role and they are ready to implement smoking cessation in practice.  
11  
12  
13  
14  
15  
16  
17  
18  
19  
20  
21  
22

23 A systematic review on belief and attitude of physicians in United Kingdom revealed that the  
24 three most prevalent negative beliefs concerned the time needed to discuss smoking, a  
25 perceived lack of effectiveness of such discussions, and a perceived lack of skill in conducting  
26 such discussions.<sup>53</sup> As skill is concerned, training in smoking cessation program can increase  
27 the level of confidence among quit smoking providers, and with experience, can reduce the  
28 consultation time and increase the effectiveness of consultation. Although most healthcare  
29 providers already have positive attitude scores towards smoking cessation intervention at pre-  
30 training, the mean total attitude scores increased significantly at post training. This reflected  
31 that the training could help healthcare providers to understand their role in providing smoking  
32 cessation intervention. Thus, it is important to equip them with skills to competently assist  
33 smokers to quit.<sup>54</sup>  
34  
35  
36  
37  
38  
39  
40  
41  
42  
43  
44  
45  
46  
47  
48  
49

50 The study findings also suggested that there is a potential benefit by training all healthcare  
51 providers, particularly in self-efficacy. However, when self-efficacy was explored by each item,  
52 it was apparent that they lacked in confidence about the 5A's component at pre-training with  
53 "Ask" and "Advise" being higher and "Assess", "Assist" and "Arrange" somewhat lower. The  
54 confidence level was increased for all of these 5 A's approaches after the training especially  
55  
56  
57  
58  
59  
60

1  
2  
3 "Assist" and "Assess". It showed that SCOPE training has potential in increasing knowledge,  
4 attitude and self-efficacy of healthcare providers. Our result was in accordance with previous  
5 study suggesting that simple activities like "Ask" and "Advise" supported by existing systems  
6 that prompt good performance whereas "Assess", and "Assist" require more complex skill  
7 sets. Additional to that, higher degree of coordinated clinic system is needed for "Arrange" for  
8 follow up cases for clinicians. Integrated system-based approach involving multiple top down  
9 stakeholders and environmental factors with the goal of connecting administrators, clinicians  
10 and staff to develop effective strategies to provide smokers with smoking cessation  
11 intervention is indeed needed.<sup>44</sup> Apart from that, updated clinical practice guideline for treating  
12 tobacco use and dependence has emphasized the increasing evidence that healthcare  
13 system significantly affects the likelihood that smokers receive effective smoking cessation  
14 intervention.<sup>12</sup> We suggest that video demonstration, role-play<sup>55</sup> and practical session play a  
15 very important role to help in increasing confidence of healthcare providers in providing more  
16 complex 5 A's components. It was also observed that healthcare providers could provide  
17 effective intervention, as they were more confident to assess and assist patients from  
18 ambivalence stage to change and then offering them with appropriate behavioural and  
19 pharmacotherapy intervention.  
20  
21  
22  
23  
24  
25  
26  
27  
28  
29  
30  
31  
32  
33  
34  
35  
36  
37  
38  
39  
40  
41

42 With respect to the self-efficacy, SCOPE training particularly increased healthcare providers'  
43 confidence to use smokerlyser followed by behavioural therapy and pharmacotherapy thus  
44 suggesting that more emphasize should be made for this training module as the pre-training  
45 score is lowest compared to others. This again supported the evidence that training on  
46 smoking cessation should be widely and continuously provided to all healthcare providers to  
47 help increasing their performance using more complex components (Assess, Assist and  
48 Arrange) in the 5 A's smoking cessation intervention.  
49  
50  
51  
52  
53  
54  
55  
56  
57  
58  
59  
60

1  
2  
3 Nevertheless, our study has some limitations. Firstly, it relies on self-reported response from  
4 our healthcare providers. Data must be carefully interpreted as there is the possibility of  
5 healthcare providers tend to over-report the frequency of smoking cessation intervention.<sup>49</sup>  
6  
7 The healthcare providers involved in this study were only from three out of fourteen states in  
8 Malaysia. Thus, generalizability to overall population of healthcare providers should be  
9 cautioned. The nature of pre- and post-study lacks control group for the intervention and  
10 without long term follow up does not indicate causal relationship between the impact of the  
11 training on the actual healthcare providers' behaviour and smoking cessation outcome. Future  
12 study should consider having a control group, preferably in a larger sample to improve the  
13 significance of this study. This study also could explore more in terms of their attitude towards  
14 smoking cessation advice, where in depth questions or qualitative approach would help  
15 answer this section on attitude. Even though knowledge has been greatly improved in this  
16 study, the duration of the information retained is not measured as no follow-up study was  
17 done. Evidence showed that knowledge can be maintained beyond three-month follow up  
18 period except for brief advice component, which decreased at three months.<sup>47</sup> Thus,  
19 continuing professional course for smoking cessation should be done frequently.  
20  
21  
22  
23  
24  
25  
26  
27  
28  
29  
30  
31  
32  
33  
34  
35  
36  
37  
38  
39  
40

## 41 Conclusion

42  
43  
44 In conclusion, this study demonstrates that SCOPE training improved healthcare providers'  
45 knowledge, attitude and self-efficacy on smoking cessation intervention. Continuous future  
46 training is recommended to better equip healthcare providers with the latest knowledge, right  
47 attitude and high self-efficacy to successfully integrate what they have learned into their  
48 practice.  
49  
50  
51  
52  
53  
54  
55  
56  
57

## 58 Conflict of interest



1  
2  
3 The other authors have no competing interest to declare.  
4  
5  
6  
7  
8

## 9 Funding

10  
11  
12 This study was funded by University of Malaya Grand Challenge Research Grant, Wellness  
13 Cluster (GC004A-15HTM).  
14  
15  
16

## 17 Acknowledgements

18  
19  
20 The authors would like to express our sincere gratitude to the speakers from NARCC group  
21 and healthcare providers for their generous contribution to this project.  
22  
23  
24  
25  
26  
27  
28  
29

## 30 Author statement

31  
32  
33 Siti Idayu was responsible for study design, data collection, analysis and drafted the  
34 manuscript. Farizah was responsible for developing training module, supervising and  
35 reviewing manuscript. Amani @ Natasha was involved in the reviewing manuscript. Amer  
36 Siddiq was responsible for developing training module, supervising and reviewing manuscript  
37 as well as investigator for this study. All authors critically reviewed the manuscript and  
38 approved the final version.  
39  
40  
41  
42  
43  
44  
45  
46  
47  
48  
49

## 50 Data sharing statement

51  
52  
53 All the data for the study is stored at the Nicotine Addiction Research Group, UMCAS in  
54 University of Malaya, Kuala Lumpur, Malaysia. Only team members have access to the raw  
55 data for the sole purpose of dissemination of the results. Data analysis is ongoing.  
56  
57  
58  
59  
60



## References

1. WHO. WHO global report on trends in prevalence of tobacco smoking 2015. . 2015
2. Alberg AJ, Shopland DR, Cummings KM. The 2014 Surgeon General's Report: Commemorating the 50th Anniversary of the 1964 Report of the Advisory Committee to the US Surgeon General and Updating the Evidence on the Health Consequences of Cigarette Smoking. *American Journal of Epidemiology* 2014;179(4):403-12. doi: 10.1093/aje/kwt335
3. Carson KV VM, Crone MR, Brinn MP, Esterman AJ, Assendelft WJJ, Smith BJ. . Training health professionals in smoking cessation. . *Cochrane Database of Systematic Reviews* 2012; Art. No.: CD000214(5) doi: 10.1002/14651858.CD000214.pub2
4. Stead L, Diana B, Nataly P, et al. Physician advice for smoking cessation. *Cochrane Database of Systematic Reviews* 2013;5 doi: 10.1002/14651858.CD000165.pub4.
5. Hudmon KS, Prokhorov AV, Corelli RL. Tobacco cessation counseling: Pharmacists opinions and practices. *Patient Education and Counseling* 2006;61(1):152-60. doi: 10.1016/j.pec.2005.03.009
6. Aquilino ML, Farris KB, Zillich AJ, et al. Smoking-Cessation Services in Iowa Community Pharmacies. *Pharmacotherapy: The Journal of Human Pharmacology and Drug Therapy* 2003;23(5):666-73. doi: 10.1592/phco.23.5.666.32192
7. Simansalam S, Brewster JM, Nik Mohamed MH. Training Malaysian Pharmacy Undergraduates with Knowledge and Skills on Smoking Cessation. *American Journal of Pharmaceutical Education* 2015;79(5):71. doi: 10.5688/ajpe79571
8. Cornuz J, Humair J-P, Seematter L, et al. Efficacy of Resident Training in Smoking CessationA Randomized, Controlled Trial of a Program Based on Application of Behavioral Theory and Practice with Standardized Patients. *Annals of Internal Medicine* 2002;136(6):429-37.
9. Sheffer CE, Barone C, Anders ME. Training Nurses in the Treatment of Tobacco Use and Dependence: Pre- and Post-Training Results. *Journal of advanced nursing* 2011;67(1):176-83. doi: 10.1111/j.1365-2648.2010.05483.x
10. Poon VHK. Model for counseling people in relationships. *Canadian Family Physician* 2007;53(2):237-38.
11. Fiore MC, Jaén CR, Baker TB. Treating Tobacco Use and Dependence:2008 Update.Clinical Practice Guideline. Rockville, MD: U.S. Department of Health and Human Services. Public Health Service 2008.
12. Siu AL, for the USPSTF. Behavioral and pharmacotherapy interventions for tobacco smoking cessation in adults, including pregnant women: U.s. preventive services task force recommendation statement. *Annals of Internal Medicine* 2015;163(8):622-34. doi: 10.7326/M15-2023
13. Sheffer CE, Barone CP, Anders ME. Training health care providers in the treatment of tobacco use and dependence: pre- and post-training results. *Journal of Evaluation in Clinical Practice* 2009;15(4):607-13. doi: 10.1111/j.1365-2753.2008.01058.x
14. Quinn VP, Hollis JF, Smith KS, et al. Effectiveness of the 5-As Tobacco Cessation Treatments in Nine HMOs. *Journal of General Internal Medicine* 2009;24(2):149-54. doi: 10.1007/s11606-008-0865-9
15. Rigotti NA. Training Future Physicians to Deliver Tobacco Cessation Treatment. *Journal of General Internal Medicine* 2016;31(2):144-46. doi: 10.1007/s11606-015-3560-7
16. Ferketich AK, Khan Y, Wewers ME. Are physicians asking about tobacco use and assisting with cessation? Results from the 2001-2004 national ambulatory medical care survey (NAMCS). *Prev Med* 2006;43 doi: 10.1016/j.ypmed.2006.07.009
17. Jamal A, R DS, Babb SD, et al. Tobacco Use Screening and Cessation Assistance During Physician Office Visits Among Persons Aged 11–21 Years — National Ambulatory Medical Care Survey, United States, 2004–2010. *MMWR Morb Mortal Wkly Rep* 2014 2014;63(2):71-79.
18. (IPH) IfPH. National Health and Morbidity Survey 2015 – Report on Smoking Status Among Malaysian Adults, Ministry of Health Malaysia. 2015

19. (IPH) IfPH. Report of the Global Adult Tobacco Survey (GATS) Malaysia, 2011, Ministry of Health Malaysia. 2011
20. Wipfli H. The Tobacco Atlas, Fourth Edition. *American Journal of Epidemiology* 2012;176(12):1193-93. doi: 10.1093/aje/kws389
21. CDC. Quitting smoking among adults — United States, 2001–2010. *Morbidity and Mortality Weekly Report*. 2011;60:1513–19.
22. Cosci F. Nicotine dependence and psychological distress: outcomes and clinical implications in smoking cessation. *Psychology Research and Behavior Management* 2011:119. doi: 10.2147/prbm.s14243
23. Saito A, Nishina M, Murai K, et al. Health professional's perceptions of and potential barriers to smoking cessation care: a survey study at a dental school hospital in Japan. *BMC Research Notes* 2010;3(1):329.
24. Tong EK, Strouse R, Hall J, et al. National survey of U.S. health professionals' smoking prevalence, cessation practices, and beliefs. *Nicotine & Tobacco Research* 2010;12(7):724-33. doi: 10.1093/ntr/ntq071
25. Omole O, Ngobale K, Ayo-Yusuf O. Missed opportunities for tobacco use screening and brief cessation advice in South African primary health care: a cross-sectional study. *BMC Family Practice* 2010;11(1):94.
26. Al Hosani S, Al Ali M, Al-Marashda K, et al. Smoking Prevalence, Attitudes and Behaviors Primary Healthcare Providers and its Impact on Their Smoking Cessation Counseling Practices 2014.
27. Berman BA, Yancey AK, Bastani R, et al. African-American physicians and smoking cessation counseling. *Journal of the National Medical Association* 1997;89(8):534-42.
28. Taha NA, Guat Tee O. Tobacco cessation through community pharmacies: Knowledge, attitudes, practices and perceived barriers among pharmacists in Penang. *Health Education Journal* 2015;74(6):681-90. doi: 10.1177/0017896914558643
29. Rojewski AM, Bailey SR, Bernstein SL, et al. Considering Systemic Barriers to Treating Tobacco Use in Clinical Settings in the United States. *Nicotine & Tobacco Research* 2018:nty123-nty23. doi: 10.1093/ntr/nty123
30. Brose LS, McEwen A, Michie S, et al. Treatment manuals, training and successful provision of stop smoking behavioural support. *Behaviour Research and Therapy* 2015;71:34-39. doi: <http://dx.doi.org/10.1016/j.brat.2015.05.013>
31. Brose LS, West R, Michie S, et al. Effectiveness of an online knowledge training and assessment program for stop smoking practitioners. *Nicotine & Tobacco Research: Official Journal Of The Society For Research On Nicotine And Tobacco* 2012;14(7):794-800. doi: 10.1093/ntr/ntq286
32. Martin BA, Bruskiwitz RH, Chewing BA. Effect of a tobacco cessation continuing professional education program on pharmacists' confidence, skills, and practice-change behaviors. *Journal of the American Pharmacists Association : JAPhA* 2010;50(1):9-16. doi: 10.1331/JAPhA.2010.09034
33. Hayes RB, Geller A, Churchill L, et al. Teaching tobacco dependence treatment and counseling skills during medical school: Rationale and design of the Medical Students helping patients Quit tobacco (MSQuit) group randomized controlled trial. *Contemporary Clinical Trials* 2014;37(2):284-93. doi: <http://dx.doi.org/10.1016/j.cct.2014.01.008>
34. Ockene JK, Hayes RB, Churchill LC, et al. Teaching Medical Students to Help Patients Quit Smoking: Outcomes of a 10-School Randomized Controlled Trial. *Journal of General Internal Medicine* 2016;31(2):172-81. doi: 10.1007/s11606-015-3508-y
35. Steinberg MB, Alvarez MS, Delnevo CD, et al. Disparity of Physicians' Utilization of Tobacco Treatment Services. *American Journal of Health Behavior* 2006;30(4):375-86. doi: 10.5993/AJHB.30.4.4
36. WHO. Guidelines for implementation of Article 14. 2019

- 1
- 2
- 3
- 4 37. Kruse GR, Rigotti NA, Raw M, et al. Tobacco Dependence Treatment Training Programs: An
- 5 International Survey. *Nicotine & Tobacco Research* 2016;18(5):1012-18. doi:
- 6 10.1093/ntr/ntv142
- 7 38. Amer Nordin AS, Mohd Hairi F, Ahmad Tajuddin NAN. Malaysia: mQuit strengthens quit smoking
- 8 strategy. *Tobacco Control* 2016;25:498-501.
- 9 39. Amer Siddiq AN, Rahimah AK, Nurul Asyikin Y, et al. Empowering Malaysian dentists to tobacco
- 10 dependence treatment conduct. *International Dental Journal* 2014;64(4):206-12. doi:
- 11 10.1111/idj.12110
- 12 40. Hasan SI, Mohd Hairi F, Danaee M, et al. Content validity for the questionnaire on Knowledge,
- 13 Attitude and Behaviour (KAB) towards smoking cessation intervention among health care
- 14 providers *Poster presented at Society for Research on Nicotine and Tobacco 23rd Annual*
- 15 *Meeting, 8-11 March 2017, Florence, Italy 2017*
- 16 41. Hasan SI, Mohd Hairi F, Amer Nordin AS. Construct Validity and Internal Consistency Reliability of
- 17 Providers Smoking Cessation Evaluation (ProSCiTE) Tool. *12th Asia Pacific Conference on*
- 18 *Tobacco or Health (APACT) 2018*
- 19 42. Hagimoto A, Nakamura M, Masui S, et al. Effects of Trained Health Professionals' Behavioral
- 20 Counseling Skills on Smoking Cessation Outcomes. *Annals of Behavioral Medicine*
- 21 2018;kax049-kax49. doi: 10.1093/abm/kax049
- 22 43. Malan Z, Mash B, Everett-Murphy K. Evaluation of a training programme for primary care providers
- 23 to offer brief behaviour change counselling on risk factors for non-communicable diseases in
- 24 South Africa. *Patient Education and Counseling* 2016;99(1):125-31. doi:
- 25 <http://dx.doi.org/10.1016/j.pec.2015.08.008>
- 26 44. Payne TJ, Gaughf NW, Sutton MJ, et al. The impact of brief tobacco treatment training on practice
- 27 behaviours, self-efficacy and attitudes among healthcare providers. *International Journal of*
- 28 *Clinical Practice* 2014;68(7):882-89. doi: 10.1111/ijcp.12386
- 29 45. Thomas T, Passfield L, Coulton S, et al. Effectiveness of a tailored training programme in behaviour
- 30 change counselling for community pharmacists: A pilot study. *Patient Education and*
- 31 *Counseling* 2016;99(1):132-38. doi: <http://dx.doi.org/10.1016/j.pec.2015.08.004>
- 32 46. Herold R, Schiekirka S, Brown J, et al. Structured Smoking Cessation Training for Medical Students:
- 33 A Prospective Study. *Nicotine & Tobacco Research* 2016;18(12):2209-15. doi:
- 34 10.1093/ntr/ntw191
- 35 47. Jones LL, McEwen A. Evaluating an online training module on protecting children from secondhand
- 36 smoke exposure: impact on knowledge, confidence and self-reported practice of health and
- 37 social care professionals. *Bmc Public Health* 2015;15:6. doi: 10.1186/s12889-015-2488-5
- 38 48. Susi AK, Montarat T, Petcharat P, et al. Impact of Smoking Cessation Training for Community
- 39 Pharmacists in Indonesia. *Asian Pacific Journal of Cancer Prevention* 2015;16(8):3319-23.
- 40 49. Williams JM, Miskimen T, Minsky S, et al. Increasing Tobacco Dependence Treatment Through
- 41 Continuing Education Training for Behavioral Health Professionals. *Psychiatric Services*
- 42 2015;66(1):21-26. doi: doi:10.1176/appi.ps.201300523
- 43 50. Hodgetts G, Broers T, Godwin M. Smoking behaviour, knowledge and attitudes among Family
- 44 Medicine physicians and nurses in Bosnia and Herzegovina. *BMC Fam Pract* 2004;5 doi:
- 45 10.1186/1471-2296-5-12
- 46 51. Chang J-C, Lee Y-Y, Kuo L-N, et al. Knowledge, Attitudes, and Behavior Toward Smoking Cessation
- 47 among Hospital Pharmacists in Taiwan. *Journal of Experimental & Clinical Medicine*
- 48 2012;4(4):249-54. doi: <http://dx.doi.org/10.1016/j.jecm.2012.06.003>
- 49 52. Movsisyan NK, Varduhi P, Arusyak H, et al. Smoking behavior, attitudes, and cessation counseling
- 50 among healthcare professionals in Armenia. *BMC Public Health* 2012;12(1):1-8. doi:
- 51 10.1186/1471-2458-12-1028
- 52 53. Vogt F, Hall S, Marteau TM. General practitioners' and family physicians' negative beliefs and
- 53 attitudes towards discussing smoking cessation with patients: a systematic review.
- 54 2005;100(10):1423-31. doi: doi:10.1111/j.1360-0443.2005.01221.x
- 55
- 56
- 57
- 58
- 59
- 60

- 1  
2  
3 54. Saba M, Bittoun R, Saini B. A Workshop on Smoking Cessation for Pharmacy Students. *American*  
4 *Journal of Pharmaceutical Education* 2013;77(9):198. doi: 10.5688/ajpe779198  
5  
6 55. Stolz D, Langewitz W, Meyer A, et al. Enhanced Didactic Methods of Smoking Cessation Training  
7 for Medical Students—A Randomized Study. *Nicotine & Tobacco Research* 2012;14(2):224-28.  
8 doi: 10.1093/ntr/ntr186  
9  
10  
11  
12  
13  
14  
15  
16  
17  
18  
19  
20  
21  
22  
23  
24  
25  
26  
27  
28  
29  
30  
31  
32  
33  
34  
35  
36  
37  
38  
39  
40  
41  
42  
43  
44  
45  
46  
47  
48  
49  
50  
51  
52  
53  
54  
55  
56  
57  
58  
59  
60

For peer review only

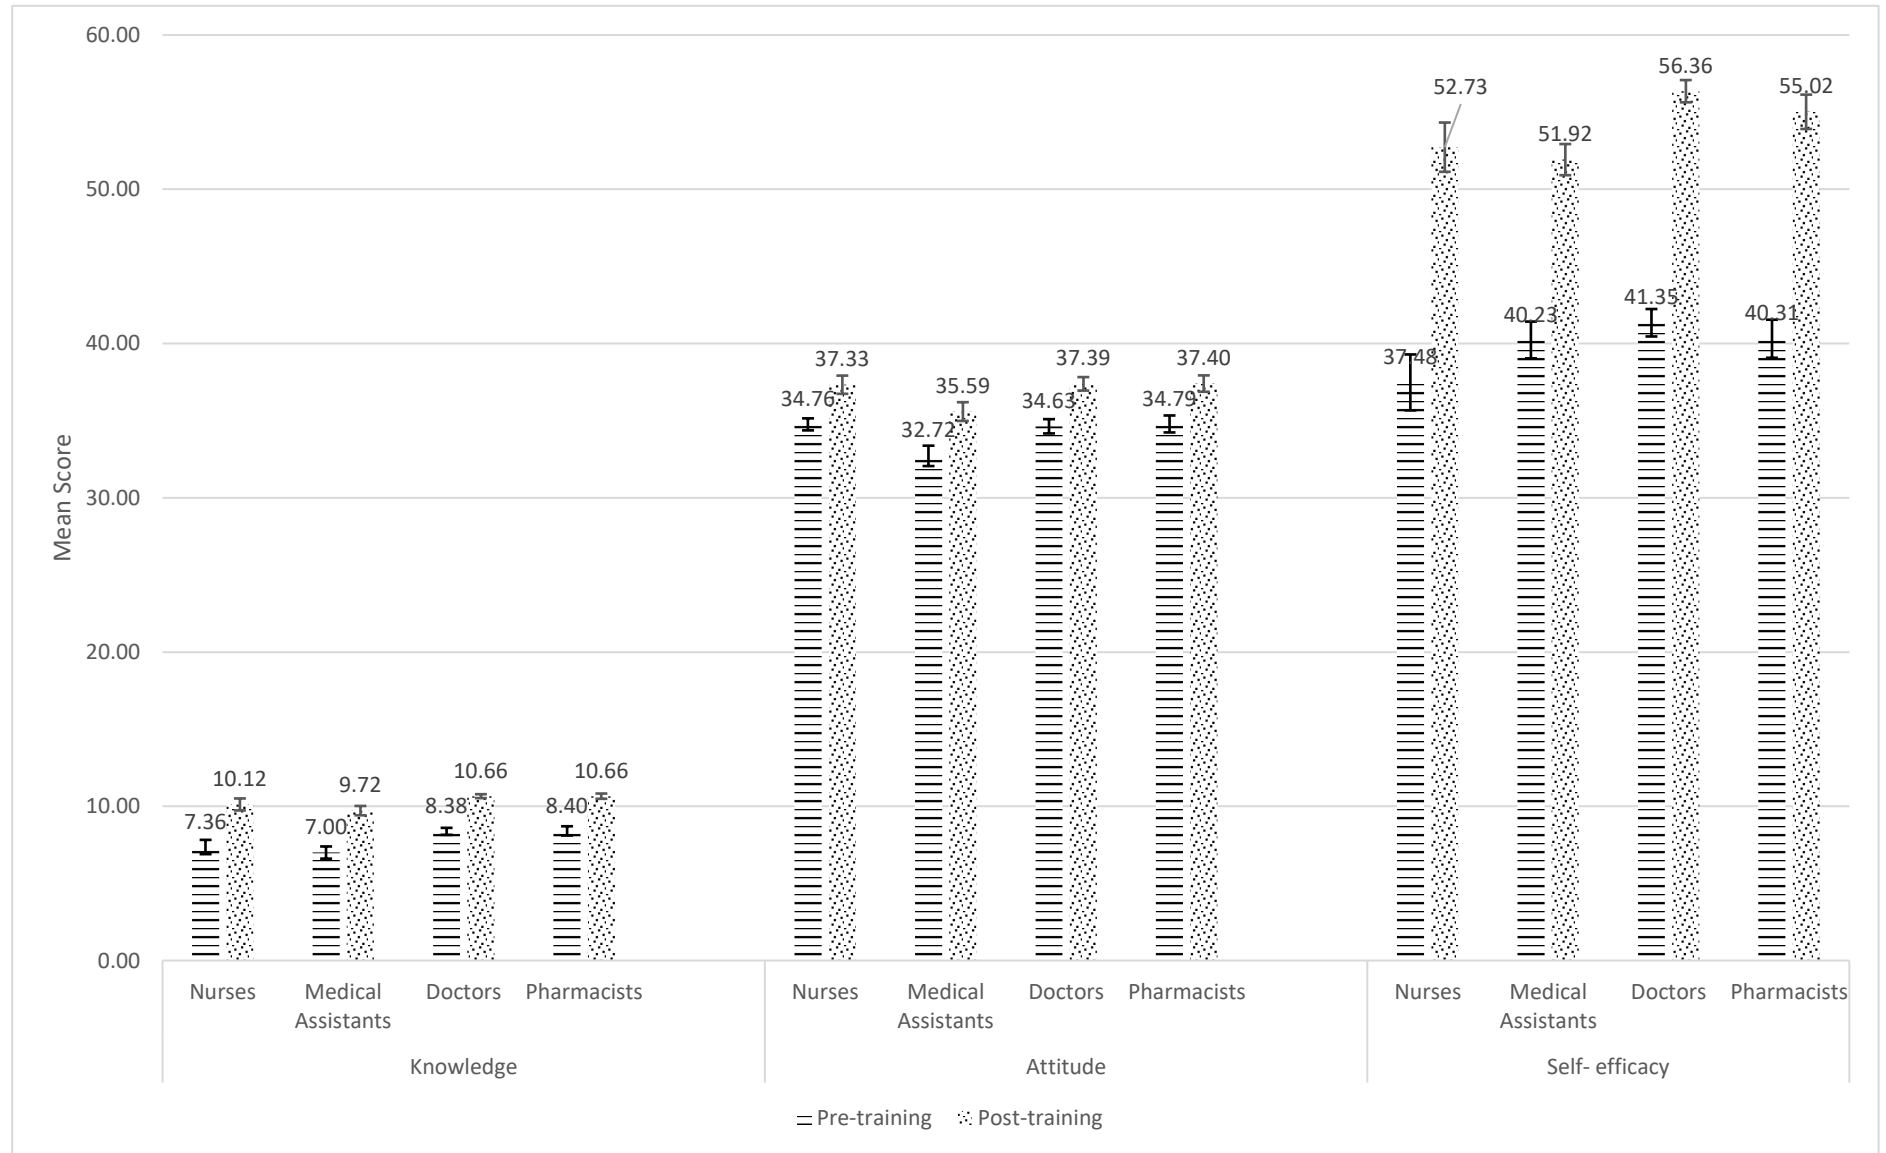

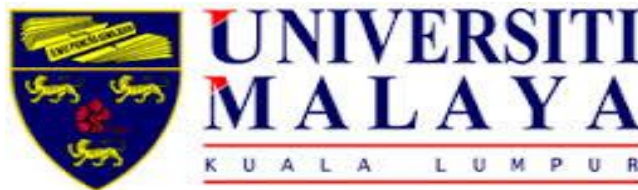

**SURVEY QUESTION: KNOWLEDGE, ATTITUDE & BEHAVIOR AMONG HEALTHCARE PROVIDERS TOWARDS SMOKING CESSATION INTERVENTION.**

**Department of Social and Preventive Medicine, Faculty of Medicine,  
University of Malaya, 50603 Kuala Lumpur Malaysia**

**THIS BOOKLET CONSISTS OF 7 SECTIONS**

| <b>Section</b> | <b>Topic</b>                                                       | <b>Page</b>    |
|----------------|--------------------------------------------------------------------|----------------|
| <b>A</b>       | <b>Demographic background</b>                                      | <b>1 – 3</b>   |
| <b>B</b>       | <b>Knowledge of smoking cessation intervention</b>                 | <b>4 - 6</b>   |
| <b>C</b>       | <b>Attitude towards smoking cessation intervention</b>             | <b>7</b>       |
| <b>D</b>       | <b>Smoking cessation intervention self-efficacy</b>                | <b>10 - 11</b> |
| <b>E</b>       | <b>Smoking cessation intervention behavior</b>                     | <b>8 - 10</b>  |
| <b>F</b>       | <b>Barriers to the provision of smoking cessation intervention</b> | <b>11 - 12</b> |

Instructions to respondents:

- 1) Please answer all the questions in this booklet.
- 2) Please consult us if you need further clarification.

All information provided by you is confidential. Identification number will not be associated with the data. We are only interested in the overall results of the questionnaire. You will not be personally identifiable. Access to the data obtained from the questionnaire is limited only to individuals involved in the data analysis. The data collected will be used in projects related to this topic.

**For further information, please contact:**

A/P Dr. Farizah binti Mohd Hairi ([farizah@um.edu.my](mailto:farizah@um.edu.my))  
A/P Dr. Amer Siddiq bin Amer Nordin ([amersiddiq@um.edu.my](mailto:amersiddiq@um.edu.my))  
Siti Idayu binti Hasan ([ayu\\_umcas@um.edu.my](mailto:ayu_umcas@um.edu.my))

**Name:**

**NRIC:**

**Institution/Organisation:**

**Phone no:**

| Time Point | T0 | T1 | T2 | T3 | T4 |
|------------|----|----|----|----|----|
|------------|----|----|----|----|----|

| ID Number |
|-----------|
|-----------|

### SECTION A: DEMOGRAPHIC BACKGROUND

**Instruction: Kindly READ all questions and mark (X) accordingly.**

- A1. What is your current age? \_\_\_\_\_ years \_\_\_\_\_ months
- A2. What is your gender?  1. Male  2. Female
- A3. What is your ethnic group?  1. Malay  2. Chinese  
 3. Indian  4. Others  
\_\_\_\_\_ (please specify)
- A4. What is your religion?  1. Islam  2. Buddhism  
 3. Christianity  4. Hinduism  
 5. Others \_\_\_\_\_ (please specify)
- A5. What is your highest qualification?  1. Diploma  2. Bachelor  
 3. Master  4. PhD  
 5. Others \_\_\_\_\_ (please specify)
- A6. Which university did you graduate from?  1. Local  2. International
- A7. Where is your practice location?  1. Urban  2. Rural
- A8. Where is your current workplace?  1. Public hospital  2. Public clinic  
 3. Private hospital  4. Private clinic  
 5. Others \_\_\_\_\_ (please specify)
- A9. What is your occupation?  1. Nurse  2. Medical Assistant  
 3. Doctor  
Specialisation: \_\_\_\_\_  
 4. Dentist  
 5. Pharmacist  6. Others  
\_\_\_\_\_ (please specify)



| Time Point | T0 | T1 | T2 | T3 | T4 |
|------------|----|----|----|----|----|
|------------|----|----|----|----|----|

| ID Number |  |
|-----------|--|
|-----------|--|

A10. What is your status on tobacco use (including manufactured cigarettes, hand rolled cigarettes, kretek pipes, curuts, cigars, cigarillos, shisha/hookah, e-cigarette and smokeless tobacco)?

1. Current smoker  
(A person who daily or occasionally smokes any tobacco product)
2. Former smoker  
(A person, who in the past, made use of at least one smoked tobacco product occasionally for a period of three months or more, or daily for a period of one month or more)
3. Non-smoker  
(A person currently does not smoke at all)

A11. How many years have you been in practice? \_\_\_\_\_ years \_\_\_\_\_ months

A12. On the average, how long do you spend your time for any of your patients/clients?  minutes

A13. In a typical week of practice, what percentage of your patients/clients are smokers?

1. 0-25%
2. 26%-50%
3. 51%-75%
4. 76%- 100%
5. Don't know

A14. Does your current workplace have a quit smoking clinic?

1. Yes
2. No
3. Don't know



| Time Point | T0 | T1 | T2 | T3 | T4 |
|------------|----|----|----|----|----|
|------------|----|----|----|----|----|

| ID Number |  |
|-----------|--|
|-----------|--|

A15. Have you attended any educational program on smoking cessation?  1. Yes  2. No (proceed to A16)

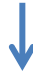

a. When did you went for smoking cessation training?

1. One month ago
2. 3 months ago
3. 6 months ago
4. More than 6 months ago

b. Place of training

1. Workplace
2. Outside Workplace

c. Was/were the previous training(s) adequate for you to provide smoking cessation treatment?

1. Adequate
2. Inadequate
3. Unsure

d. For question c, what is your definition of adequate?

---



---



---

A16. Are you interested in upgrading your smoking cessation counselling skills?

1. Not at all interested
2. Slightly interested
3. Moderately interested
4. Extremely interested

| Time Point | T0 | T1 | T2 | T3 | T4 |
|------------|----|----|----|----|----|
|------------|----|----|----|----|----|

| ID Number |  |
|-----------|--|
|-----------|--|

### SECTION B: KNOWLEDGE

Based on your knowledge, answer the following questions by marking an (X) in the appropriate box.

| No. | Item                 | Yes (1)                  | No (0)                   |
|-----|----------------------|--------------------------|--------------------------|
| a.  | Irritability         | <input type="checkbox"/> | <input type="checkbox"/> |
| b.  | Depression           | <input type="checkbox"/> | <input type="checkbox"/> |
| c.  | Restlessness         | <input type="checkbox"/> | <input type="checkbox"/> |
| d.  | Poor concentration   | <input type="checkbox"/> | <input type="checkbox"/> |
| e.  | Increased appetite   | <input type="checkbox"/> | <input type="checkbox"/> |
| f.  | Weight gain          | <input type="checkbox"/> | <input type="checkbox"/> |
| g.  | Light headedness     | <input type="checkbox"/> | <input type="checkbox"/> |
| h.  | Night time awakening | <input type="checkbox"/> | <input type="checkbox"/> |
| i.  | Constipation         | <input type="checkbox"/> | <input type="checkbox"/> |
| j.  | Diarrhea             | <input type="checkbox"/> | <input type="checkbox"/> |
| k.  | Mouth ulcers         | <input type="checkbox"/> | <input type="checkbox"/> |
| l.  | Urge to smoke        | <input type="checkbox"/> | <input type="checkbox"/> |

|                   |           |           |           |           |           |
|-------------------|-----------|-----------|-----------|-----------|-----------|
| <b>Time Point</b> | <b>T0</b> | <b>T1</b> | <b>T2</b> | <b>T3</b> | <b>T4</b> |
|-------------------|-----------|-----------|-----------|-----------|-----------|

|                  |  |
|------------------|--|
| <b>ID Number</b> |  |
|------------------|--|

| <b>SECTION C: ATTITUDE TOWARDS SMOKING CESSATION INTERVENTION</b>                                                                                  |                                                                                                               |                              |                          |                                      |                          |                           |
|----------------------------------------------------------------------------------------------------------------------------------------------------|---------------------------------------------------------------------------------------------------------------|------------------------------|--------------------------|--------------------------------------|--------------------------|---------------------------|
| <b>Attitude is the tendency, based on trust and experience, to respond to smoking cessation intervention with specific methods and approaches.</b> |                                                                                                               |                              |                          |                                      |                          |                           |
| <b>Instruction: Please mark (X) one box per statement</b>                                                                                          |                                                                                                               |                              |                          |                                      |                          |                           |
| <b>No.</b>                                                                                                                                         | <b>Item</b>                                                                                                   | <b>Strongly disagree (1)</b> | <b>Disagree (2)</b>      | <b>Neither disagree or Agree (3)</b> | <b>Agree (4)</b>         | <b>Strongly agree (5)</b> |
| <b>C1.</b>                                                                                                                                         | A patient's/client's chance of quitting smoking increases if the healthcare provider advises him/her to quit. | <input type="checkbox"/>     | <input type="checkbox"/> | <input type="checkbox"/>             | <input type="checkbox"/> | <input type="checkbox"/>  |
| <b>C2.</b>                                                                                                                                         | Patients/clients want you to advise them to stop using any tobacco products.                                  | <input type="checkbox"/>     | <input type="checkbox"/> | <input type="checkbox"/>             | <input type="checkbox"/> | <input type="checkbox"/>  |
| <b>Healthcare providers like you should....</b>                                                                                                    |                                                                                                               |                              |                          |                                      |                          |                           |
| <b>C3.</b>                                                                                                                                         | get specific training on smoking cessation counselling techniques.                                            | <input type="checkbox"/>     | <input type="checkbox"/> | <input type="checkbox"/>             | <input type="checkbox"/> | <input type="checkbox"/>  |
| <b>C4.</b>                                                                                                                                         | set a good example for their patients/clients and public by not using any tobacco products.                   | <input type="checkbox"/>     | <input type="checkbox"/> | <input type="checkbox"/>             | <input type="checkbox"/> | <input type="checkbox"/>  |
| <b>C5.</b>                                                                                                                                         | routinely ask patients/clients about tobacco use.                                                             | <input type="checkbox"/>     | <input type="checkbox"/> | <input type="checkbox"/>             | <input type="checkbox"/> | <input type="checkbox"/>  |
| <b>C6.</b>                                                                                                                                         | routinely ask parents/guardians about tobacco use during paediatric visits.                                   | <input type="checkbox"/>     | <input type="checkbox"/> | <input type="checkbox"/>             | <input type="checkbox"/> | <input type="checkbox"/>  |
| <b>C7.</b>                                                                                                                                         | routinely advise patients/clients who use any tobacco products to quit.                                       | <input type="checkbox"/>     | <input type="checkbox"/> | <input type="checkbox"/>             | <input type="checkbox"/> | <input type="checkbox"/>  |
| <b>C8.</b>                                                                                                                                         | routinely assist patients/clients using any tobacco products to quit.                                         | <input type="checkbox"/>     | <input type="checkbox"/> | <input type="checkbox"/>             | <input type="checkbox"/> | <input type="checkbox"/>  |

| Time Point | T0 | T1 | T2 | T3 | T4 |
|------------|----|----|----|----|----|
|------------|----|----|----|----|----|

| ID Number |  |
|-----------|--|
|-----------|--|

### SECTION D: SMOKING CESSATION INTERVENTION SELF-EFFICACY

**Self-efficacy is one's belief in one's ability to succeed in specific situations or accomplish a task in smoking cessation intervention.**

**Instruction: Please mark (X) one box per statement.**

| No.  | Item                                                                                                     | Certainly not (1)        | Probably not (2)         | Neutral or Don't know (3) | Probably (4)             | Certainly (5)            |
|------|----------------------------------------------------------------------------------------------------------|--------------------------|--------------------------|---------------------------|--------------------------|--------------------------|
| D1.  | I know appropriate questions to ask my patients/clients.                                                 | <input type="checkbox"/> | <input type="checkbox"/> | <input type="checkbox"/>  | <input type="checkbox"/> | <input type="checkbox"/> |
| D2.  | I am able to motivate my patients/clients who are interested to quit smoking.                            | <input type="checkbox"/> | <input type="checkbox"/> | <input type="checkbox"/>  | <input type="checkbox"/> | <input type="checkbox"/> |
| D3.  | I am able to assist patients/clients to quit even if the patient thinks that it is difficult to give up. | <input type="checkbox"/> | <input type="checkbox"/> | <input type="checkbox"/>  | <input type="checkbox"/> | <input type="checkbox"/> |
| D4.  | I have the pharmacological therapy skills to assist patients/clients to quit smoking.                    | <input type="checkbox"/> | <input type="checkbox"/> | <input type="checkbox"/>  | <input type="checkbox"/> | <input type="checkbox"/> |
| D5.  | I have the behavioral therapy skills to assist patients/clients to quit smoking.                         | <input type="checkbox"/> | <input type="checkbox"/> | <input type="checkbox"/>  | <input type="checkbox"/> | <input type="checkbox"/> |
| D6.  | I can advise patients/clients to consider smoking cessation.                                             | <input type="checkbox"/> | <input type="checkbox"/> | <input type="checkbox"/>  | <input type="checkbox"/> | <input type="checkbox"/> |
| D7.  | I can provide counselling when time is limited.                                                          | <input type="checkbox"/> | <input type="checkbox"/> | <input type="checkbox"/>  | <input type="checkbox"/> | <input type="checkbox"/> |
| D8.  | I can counsel patients/clients who are not interested in quitting.                                       | <input type="checkbox"/> | <input type="checkbox"/> | <input type="checkbox"/>  | <input type="checkbox"/> | <input type="checkbox"/> |
| D9.  | I know how to prescribe medication (nicotine replacement therapy/bupropion) to treat tobacco dependency. | <input type="checkbox"/> | <input type="checkbox"/> | <input type="checkbox"/>  | <input type="checkbox"/> | <input type="checkbox"/> |
| D10. | I can assess patient's/client's different stages of readiness to quit smoking.                           | <input type="checkbox"/> | <input type="checkbox"/> | <input type="checkbox"/>  | <input type="checkbox"/> | <input type="checkbox"/> |
| D11. | I can assess patient's level of nicotine dependency using the Fagerstrom test.                           | <input type="checkbox"/> | <input type="checkbox"/> | <input type="checkbox"/>  | <input type="checkbox"/> | <input type="checkbox"/> |
| D12. | I can use smokerlyzer to determine patient's/client's carbon monoxide level.                             | <input type="checkbox"/> | <input type="checkbox"/> | <input type="checkbox"/>  | <input type="checkbox"/> | <input type="checkbox"/> |

|                   |           |           |           |           |           |
|-------------------|-----------|-----------|-----------|-----------|-----------|
| <b>Time Point</b> | <b>T0</b> | <b>T1</b> | <b>T2</b> | <b>T3</b> | <b>T4</b> |
|-------------------|-----------|-----------|-----------|-----------|-----------|

|                  |  |
|------------------|--|
| <b>ID Number</b> |  |
|------------------|--|

|             |                                                                                                                                 |                          |                          |                          |                          |                          |
|-------------|---------------------------------------------------------------------------------------------------------------------------------|--------------------------|--------------------------|--------------------------|--------------------------|--------------------------|
| <b>D13.</b> | I can assist recent quitters to learn how to cope with situations or triggers that might lead them to relapse to using tobacco. | <input type="checkbox"/> |
|-------------|---------------------------------------------------------------------------------------------------------------------------------|--------------------------|--------------------------|--------------------------|--------------------------|--------------------------|

**SECTION E: SMOKING CESSATION INTERVENTION BEHAVIOR**

**The way in which a person acts in response to any particular situation or stimulus regarding smoking cessation intervention.**

**Instruction: Please mark (X) one box per statement**

| No. | Item | Never (1) | Rarely (2) | Some-times (3) | Often (4) | Always (5) |
|-----|------|-----------|------------|----------------|-----------|------------|
|-----|------|-----------|------------|----------------|-----------|------------|

**In your current practice, how often do you....**

|             |                                                                                                     |                          |                          |                          |                          |                          |
|-------------|-----------------------------------------------------------------------------------------------------|--------------------------|--------------------------|--------------------------|--------------------------|--------------------------|
| <b>E1.</b>  | ask patients/clients whether they smoke?                                                            | <input type="checkbox"/> |
| <b>E2.</b>  | ask patients/clients the number of cigarettes smoked per day?                                       | <input type="checkbox"/> |
| <b>E3.</b>  | advise patients/clients who smoke to quit smoking?                                                  | <input type="checkbox"/> |
| <b>E4.</b>  | advise female patients/clients to quit smoking if they are pregnant or planning to become pregnant? | <input type="checkbox"/> |
| <b>E5.</b>  | advise patients/clients to quit smoking if you think their illness is related to smoking?           | <input type="checkbox"/> |
| <b>E6.</b>  | assess patients'/client's readiness to quit smoking?                                                | <input type="checkbox"/> |
| <b>E7.</b>  | assess reasons for quitting/staying quit smoking?                                                   | <input type="checkbox"/> |
| <b>E8.</b>  | assist those who are not interested in quitting smoking to think about quitting?                    | <input type="checkbox"/> |
| <b>E9.</b>  | assist those who are interested in quitting smoking to develop a plan to quit?                      | <input type="checkbox"/> |
| <b>E10.</b> | assist in setting quit dates?                                                                       | <input type="checkbox"/> |
| <b>E11.</b> | arrange referrals for appropriate smoking cessation services?                                       | <input type="checkbox"/> |

| Time Point | T0 | T1 | T2 | T3 | T4 |
|------------|----|----|----|----|----|
|------------|----|----|----|----|----|

| ID Number |  |
|-----------|--|
|-----------|--|

|      |                                                                                                                       |                          |                          |                          |                          |                          |
|------|-----------------------------------------------------------------------------------------------------------------------|--------------------------|--------------------------|--------------------------|--------------------------|--------------------------|
| E12. | provide counselling for patients/clients who want to quit smoking?                                                    | <input type="checkbox"/> |
| E13. | provide educational materials related to smoking cessation?                                                           | <input type="checkbox"/> |
| E14. | document tobacco-relevant discussion and plans in medical record?                                                     | <input type="checkbox"/> |
| E15. | use Fragerstrom test to assess patient's/client's level of addiction?                                                 | <input type="checkbox"/> |
| E16. | use smokerlyzer to determine patient's/client's Carbon Monoxide level?                                                | <input type="checkbox"/> |
| E17. | prescribe or recommend the purchase of nicotine replacement therapy products for patients/clients attempting to quit? | <input type="checkbox"/> |
| E18. | provide treatment maintenance and follow-up services to those who have quit smoking?                                  | <input type="checkbox"/> |
| E19. | arrange a follow up visit or phone call to discuss quitting smoking?                                                  | <input type="checkbox"/> |

| Time Point | T0 | T1 | T2 | T3 | T4 |
|------------|----|----|----|----|----|
|------------|----|----|----|----|----|

| ID Number |  |
|-----------|--|
|-----------|--|

### SECTION F: BARRIERS TO THE PROVISION OF SMOKING CESSATION INTERVENTION

There are various barriers that might limit the capacity to offer smoking cessation intervention for patients. Please rate the importance of each of the following items that limit you from helping patients to quit smoking.

Instruction: Please mark (X) one box per statement

| No.  | Item                                                                   | Not a barrier (1)        | Some-what a barrier (2)  | Moderate barrier (3)     | Extreme Barrier (4)      |
|------|------------------------------------------------------------------------|--------------------------|--------------------------|--------------------------|--------------------------|
| F1.  | Patients/clients are not interested in quitting smoking.               | <input type="checkbox"/> | <input type="checkbox"/> | <input type="checkbox"/> | <input type="checkbox"/> |
| F2.  | Patients/clients are not ready to change.                              | <input type="checkbox"/> | <input type="checkbox"/> | <input type="checkbox"/> | <input type="checkbox"/> |
| F3.  | Patients/clients do not comply with the given pharmacological therapy. | <input type="checkbox"/> | <input type="checkbox"/> | <input type="checkbox"/> | <input type="checkbox"/> |
| F4.  | Patients/clients do not comply with the given behavioral therapy.      | <input type="checkbox"/> | <input type="checkbox"/> | <input type="checkbox"/> | <input type="checkbox"/> |
| F5.  | Lack of impact of pharmacological therapy on patients/clients.         | <input type="checkbox"/> | <input type="checkbox"/> | <input type="checkbox"/> | <input type="checkbox"/> |
| F6.  | Lack of impact of behavioral therapy on patients/clients.              | <input type="checkbox"/> | <input type="checkbox"/> | <input type="checkbox"/> | <input type="checkbox"/> |
| F7.  | Lack of knowledge of smoking cessation.                                | <input type="checkbox"/> | <input type="checkbox"/> | <input type="checkbox"/> | <input type="checkbox"/> |
| F8.  | Lack of time.                                                          | <input type="checkbox"/> | <input type="checkbox"/> | <input type="checkbox"/> | <input type="checkbox"/> |
| F9.  | Other health problems require priority treatment.                      | <input type="checkbox"/> | <input type="checkbox"/> | <input type="checkbox"/> | <input type="checkbox"/> |
| F10. | Lack of reimbursement to healthcare providers.                         | <input type="checkbox"/> | <input type="checkbox"/> | <input type="checkbox"/> | <input type="checkbox"/> |
| F11. | Lack of community resources to refer patients/clients.                 | <input type="checkbox"/> | <input type="checkbox"/> | <input type="checkbox"/> | <input type="checkbox"/> |
| F12. | Inadequate smoking cessation pharmaceutical drugs.                     | <input type="checkbox"/> | <input type="checkbox"/> | <input type="checkbox"/> | <input type="checkbox"/> |
| F13. | Lack of patient/client education materials.                            | <input type="checkbox"/> | <input type="checkbox"/> | <input type="checkbox"/> | <input type="checkbox"/> |
| F14. | Lack of smoking cessation training.                                    | <input type="checkbox"/> | <input type="checkbox"/> | <input type="checkbox"/> | <input type="checkbox"/> |
| F15. | Complexity of smoking cessation guidelines.                            | <input type="checkbox"/> | <input type="checkbox"/> | <input type="checkbox"/> | <input type="checkbox"/> |

**STROBE 2007 (v4) checklist of items to be included in reports of observational studies in epidemiology\***  
**Checklist for cohort, case-control, and cross-sectional studies (combined)**

| Section/Topic             | Item # | Recommendation                                                                                                                                                                                                                                                                                                                                                                                                                                                         | Reported on page # |
|---------------------------|--------|------------------------------------------------------------------------------------------------------------------------------------------------------------------------------------------------------------------------------------------------------------------------------------------------------------------------------------------------------------------------------------------------------------------------------------------------------------------------|--------------------|
| Title and abstract        | 1      | (a) Indicate the study's design with a commonly used term in the title or the abstract                                                                                                                                                                                                                                                                                                                                                                                 | 1 & 2              |
|                           |        | (b) Provide in the abstract an informative and balanced summary of what was done and what was found                                                                                                                                                                                                                                                                                                                                                                    | 2                  |
| <b>Introduction</b>       |        |                                                                                                                                                                                                                                                                                                                                                                                                                                                                        |                    |
| Background/rationale      | 2      | Explain the scientific background and rationale for the investigation being reported                                                                                                                                                                                                                                                                                                                                                                                   | 4 - 8              |
| Objectives                | 3      | State specific objectives, including any pre-specified hypotheses                                                                                                                                                                                                                                                                                                                                                                                                      | 8                  |
| <b>Methods</b>            |        |                                                                                                                                                                                                                                                                                                                                                                                                                                                                        |                    |
| Study design              | 4      | Present key elements of study design early in the paper                                                                                                                                                                                                                                                                                                                                                                                                                | 10                 |
| Setting                   | 5      | Describe the setting, locations, and relevant dates, including periods of recruitment, exposure, follow-up, and data collection                                                                                                                                                                                                                                                                                                                                        | 10 & 11            |
| Participants              | 6      | (a) <i>Cohort study</i> —Give the eligibility criteria, and the sources and methods of selection of participants. Describe methods of follow-up<br><i>Case-control study</i> —Give the eligibility criteria, and the sources and methods of case ascertainment and control selection. Give the rationale for the choice of cases and controls<br><i>Cross-sectional study</i> —Give the eligibility criteria, and the sources and methods of selection of participants | 11                 |
|                           |        | (b) <i>Cohort study</i> —For matched studies, give matching criteria and number of exposed and unexposed<br><i>Case-control study</i> —For matched studies, give matching criteria and the number of controls per case                                                                                                                                                                                                                                                 |                    |
| Variables                 | 7      | Clearly define all outcomes, exposures, predictors, potential confounders, and effect modifiers. Give diagnostic criteria, if applicable                                                                                                                                                                                                                                                                                                                               | 10 & 11            |
| Data sources/ measurement | 8*     | For each variable of interest, give sources of data and details of methods of assessment (measurement). Describe comparability of assessment methods if there is more than one group                                                                                                                                                                                                                                                                                   | 10 & 11            |
| Bias                      | 9      | Describe any efforts to address potential sources of bias                                                                                                                                                                                                                                                                                                                                                                                                              | 11                 |
| Study size                | 10     | Explain how the study size was arrived at                                                                                                                                                                                                                                                                                                                                                                                                                              | 10                 |
| Quantitative variables    | 11     | Explain how quantitative variables were handled in the analyses. If applicable, describe which groupings were chosen and why                                                                                                                                                                                                                                                                                                                                           | 12                 |
| Statistical methods       | 12     | (a) Describe all statistical methods, including those used to control for confounding                                                                                                                                                                                                                                                                                                                                                                                  | 12                 |
|                           |        | (b) Describe any methods used to examine subgroups and interactions                                                                                                                                                                                                                                                                                                                                                                                                    |                    |
|                           |        | (c) Explain how missing data were addressed                                                                                                                                                                                                                                                                                                                                                                                                                            |                    |
|                           |        | (d) <i>Cohort study</i> —If applicable, explain how loss to follow-up was addressed<br><i>Case-control study</i> —If applicable, explain how matching of cases and controls was addressed                                                                                                                                                                                                                                                                              |                    |



|                          |     |                                                                                                                                                                                                                                                                                                                                                                                                               |         |
|--------------------------|-----|---------------------------------------------------------------------------------------------------------------------------------------------------------------------------------------------------------------------------------------------------------------------------------------------------------------------------------------------------------------------------------------------------------------|---------|
|                          |     | <i>Cross-sectional study</i> —If applicable, describe analytical methods taking account of sampling strategy                                                                                                                                                                                                                                                                                                  |         |
|                          |     | (e) Describe any sensitivity analyses                                                                                                                                                                                                                                                                                                                                                                         |         |
| <b>Results</b>           |     |                                                                                                                                                                                                                                                                                                                                                                                                               |         |
| Participants             | 13* | (a) Report numbers of individuals at each stage of study—eg numbers potentially eligible, examined for eligibility, confirmed eligible, included in the study, completing follow-up, and analysed<br>(b) Give reasons for non-participation at each stage<br>(c) Consider use of a flow diagram                                                                                                               | 12      |
| Descriptive data         | 14* | (a) Give characteristics of study participants (eg demographic, clinical, social) and information on exposures and potential confounders<br>(b) Indicate number of participants with missing data for each variable of interest<br>(c) <i>Cohort study</i> —Summarise follow-up time (eg, average and total amount)                                                                                           | 12      |
| Outcome data             | 15* | <i>Cohort study</i> —Report numbers of outcome events or summary measures over time<br><i>Case-control study</i> —Report numbers in each exposure category, or summary measures of exposure<br><i>Cross-sectional study</i> —Report numbers of outcome events or summary measures                                                                                                                             | 14 - 17 |
| Main results             | 16  | (a) Give unadjusted estimates and, if applicable, confounder-adjusted estimates and their precision (eg, 95% confidence interval). Make clear which confounders were adjusted for and why they were included<br>(b) Report category boundaries when continuous variables were categorized<br>(c) If relevant, consider translating estimates of relative risk into absolute risk for a meaningful time period |         |
| Other analyses           | 17  | Report other analyses done—eg analyses of subgroups and interactions, and sensitivity analyses                                                                                                                                                                                                                                                                                                                |         |
| <b>Discussion</b>        |     |                                                                                                                                                                                                                                                                                                                                                                                                               |         |
| Key results              | 18  | Summarise key results with reference to study objectives                                                                                                                                                                                                                                                                                                                                                      | 17 & 18 |
| Limitations              | 19  | Discuss limitations of the study, taking into account sources of potential bias or imprecision. Discuss both direction and magnitude of any potential bias                                                                                                                                                                                                                                                    | 21      |
| Interpretation           | 20  | Give a cautious overall interpretation of results considering objectives, limitations, multiplicity of analyses, results from similar studies, and other relevant evidence                                                                                                                                                                                                                                    | 21      |
| Generalisability         | 21  | Discuss the generalisability (external validity) of the study results                                                                                                                                                                                                                                                                                                                                         | 21      |
| <b>Other information</b> |     |                                                                                                                                                                                                                                                                                                                                                                                                               |         |
| Funding                  | 22  | Give the source of funding and the role of the funders for the present study and, if applicable, for the original study on which the present article is based                                                                                                                                                                                                                                                 | 22      |

\*Give information separately for cases and controls in case-control studies and, if applicable, for exposed and unexposed groups in cohort and cross-sectional studies.

**Note:** An Explanation and Elaboration article discusses each checklist item and gives methodological background and published examples of transparent reporting. The STROBE checklist is best used in conjunction with this article (freely available on the Web sites of PLoS Medicine at <http://www.plosmedicine.org/>, Annals of Internal Medicine at <http://www.annals.org/>, and Epidemiology at <http://www.epidem.com/>). Information on the STROBE Initiative is available at [www.strobe-statement.org](http://www.strobe-statement.org).

# BMJ Open

## EMPOWERING HEALTHCARE PROVIDERS THROUGH SMOKING CESSATION TRAINING IN MALAYSIA: A PRE- AND POST-INTERVENTION EVALUATION ON THE IMPROVEMENT OF KNOWLEDGE, ATTITUDE & SELF-EFFICACY.

|                                 |                                                                                                                                                                                                                                                                                                                                                                                                                                                                                                                                                                                                                    |
|---------------------------------|--------------------------------------------------------------------------------------------------------------------------------------------------------------------------------------------------------------------------------------------------------------------------------------------------------------------------------------------------------------------------------------------------------------------------------------------------------------------------------------------------------------------------------------------------------------------------------------------------------------------|
| Journal:                        | <i>BMJ Open</i>                                                                                                                                                                                                                                                                                                                                                                                                                                                                                                                                                                                                    |
| Manuscript ID                   | bmjopen-2019-030670.R2                                                                                                                                                                                                                                                                                                                                                                                                                                                                                                                                                                                             |
| Article Type:                   | Original research                                                                                                                                                                                                                                                                                                                                                                                                                                                                                                                                                                                                  |
| Date Submitted by the Author:   | 15-Aug-2019                                                                                                                                                                                                                                                                                                                                                                                                                                                                                                                                                                                                        |
| Complete List of Authors:       | Hasan, Siti Idayu; University of Malaya, Social & Preventive Medicine; University of Malaya, Nicotine Addiction Research & Collaboration, UMCAS<br>Mohd Hairi, Farizah; University of Malaya, Social & Preventive Medicine; University of Malaya, Nicotine Addiction Research & Collaboration, UMCAS<br>Ahmad Tajuddin, Amani @ Natasha; University of Malaya, Primary Care Medicine; University of Malaya, Nicotine Addiction Research & Collaboration, UMCAS<br>Amer Nordin, Amer Siddiq; University of Malaya, Psychological Medicine; University of Malaya, Nicotine Addiction Research & Collaboration, UMCAS |
| <b>Primary Subject Heading</b>: | Medical education and training                                                                                                                                                                                                                                                                                                                                                                                                                                                                                                                                                                                     |
| Secondary Subject Heading:      | Addiction, Health policy, Public health, Smoking and tobacco                                                                                                                                                                                                                                                                                                                                                                                                                                                                                                                                                       |
| Keywords:                       | program evaluation, smoking cessation, healthcare providers, knowledge, attitude, self-efficacy                                                                                                                                                                                                                                                                                                                                                                                                                                                                                                                    |
|                                 |                                                                                                                                                                                                                                                                                                                                                                                                                                                                                                                                                                                                                    |

SCHOLARONE™  
Manuscripts

1  
2  
3 **TITLE: EMPOWERING HEALTHCARE PROVIDERS THROUGH SMOKING**  
4 **CESSATION TRAINING IN MALAYSIA: A PRE- AND POST-INTERVENTION**  
5 **EVALUATION ON THE IMPROVEMENT OF KNOWLEDGE, ATTITUDE & SELF-**  
6 **EFFICACY.**  
7  
8  
9  
10  
11  
12

13 **SITI IDAYU HASAN<sup>1,4</sup>, FARIZAH MOHD HAIRI<sup>1,4</sup> AMANI @ NATASHA AHMAD**  
14 **TAJUDDIN<sup>2,4</sup> & AMER SIDDIQ AMER NORDIN<sup>3,4</sup>,**  
15  
16  
17

18 <sup>1</sup>Department of Social & Preventive Medicine, Faculty of Medicine, University of Malaya,  
19 Lembah Pantai, Kuala Lumpur, Malaysia.

20  
21 <sup>2</sup>Department of Primary Care Medicine, Faculty of Medicine, University of Malaya, Lembah  
22 Pantai, Kuala Lumpur, Malaysia.

23  
24 <sup>3</sup>Department of Psychological Medicine, Faculty of Medicine, University of Malaya, Lembah  
25 Pantai, Kuala Lumpur, Malaysia.

26  
27 <sup>4</sup>Nicotine Addiction Research Group UMCAS, University of Malaya, Jalan Pantai Baharu,  
28 Kuala Lumpur, Malaysia.

29  
30  
31  
32  
33 **Authors:**

34  
35 Department of Social & Preventive Medicine, Faculty of Medicine, University of Malaya,  
36 Lembah Pantai, 50603 Kuala Lumpur, Malaysia.  
37 Siti Idayu Hasan, PhD student, University of Malaya.

38  
39 Department of Social & Preventive Medicine, Faculty of Medicine, University of Malaya,  
40 Lembah Pantai, 50603 Kuala Lumpur, Malaysia.  
41 Farizah Mohd Hairi, Associate Professor/Public Health Physician & Consultant, University of  
42 Malaya.

43  
44 Department of Primary Care Medicine, Faculty of Medicine, University of Malaya, Lembah  
45 Pantai, 50603 Kuala Lumpur, Malaysia.  
46 Amani @ Natasha Ahmad Tajuddin, Family Medicine Specialist, University of Malaya.

47  
48 Department of Psychological Medicine, Faculty of Medicine, University of Malaya, Lembah  
49 Pantai, 50603 Kuala Lumpur, Malaysia.  
50 Amer Siddiq Amer Nordin, Associate Professor/Consultant Psychiatrist and Addiction  
51 Medicine Specialist.

52  
53 **Correspondence to:** Farizah Mohd Hairi at farizah@um.edu.my

54  
55 **Word count: 5606**

56  
57 **References count: 54**  
58  
59  
60

## Abstract

Objectives: Healthcare providers are ideally positioned to advise their patients to quit smoking by providing effective smoking cessation intervention. Thus, we evaluate the effectiveness of a one-day training programme in changing the knowledge, attitude and self-efficacy of healthcare providers in smoking cessation intervention.

Methods: A pre-post study design was conducted in 2017. The eight-hour Smoking Cessation Organising, Planning & Execution (SCOPE) training comprising lectures, practical sessions and role-play sessions to 218 healthcare providers. A validated evaluation tool, Providers' Smoking Cessation Training Evaluation (ProSCiTE), was administered to assess the impact of training on knowledge, attitude, and self-efficacy on smoking cessation intervention.

Results: After SCOPE training, the knowledge score increased significantly from  $7.96 \pm 2.34$  to  $10.35 \pm 1.57$  ( $p < 0.001$ ). Attitude and self-efficacy in smoking cessation intervention also increased significantly from  $34.32 \pm 4.12$  to  $37.04 \pm 3.92$  ( $p < 0.001$ ) and  $40.31 \pm 8.61$  to  $54.67 \pm 7.45$  ( $p < 0.001$ ) respectively. Pre- and post-training scores improved significantly for all professions, and each measure, particularly self-efficacy.

Conclusion: This study demonstrates that SCOPE training could improve healthcare providers' knowledge, attitude and self-efficacy on smoking cessation intervention. Future training is recommended to equip healthcare providers with current knowledge, positive attitude and high self-efficacy to integrate what they have learned into practice successfully.

Keywords: programme evaluation, smoking cessation, healthcare providers, knowledge, attitude, self-efficacy

### Strengths and limitations of this study

- This study is novel given that it is the first study to document the changes in multidisciplinary healthcare providers (doctors, pharmacists, nurses and medical assistants) on knowledge, attitude and self-efficacy to deliver smoking cessation intervention following eight-hour SCOPE training comprising lectures, practical sessions, and role-play sessions.
- Since all healthcare providers were invited, there was a risk of selection bias, and there are inherent risks for inaccuracies when relying on self-reported data.
- The sample was drawn from three out of 14 states in Malaysia; thus, caution should be exercised when generalising the findings to the entire population.
- The nature of pre- and post-study lacks a control group for the intervention and long-term follow-up to indicate the causal relationship between the impact of the training on the actual healthcare providers' behaviour and smoking cessation outcome.
- This study does not include implementation data and, therefore, no data is available to suggest that changes of knowledge, attitude and self-efficacy translate into practice.

## Introduction

Tobacco use is among the leading preventable causes of death and disease globally. Approximately six million people die from tobacco-related diseases every year, which translates into one in ten deaths among adults worldwide <sup>1</sup>. More than 600,000 people die each year from exposure to second-hand smoke, and it is estimated that by 2030, the annual death toll could rise to eight million <sup>1</sup>. The Surgeon General in “The Health Consequence of Smoking – 50 Years of Progress” 2014 report concluded that smoking could cause cancer, respiratory disease, cardiovascular disease, reproductive disease, dental disease, inflammatory bowel disease, diabetes and autoimmune disease <sup>2</sup>. Cochrane reviews provide concrete evidence that stopping smoking could reduce smoking-related diseases <sup>3</sup>. More importantly, offering help to quit smoking by healthcare providers has been proven to be an effective strategy to combat tobacco-related problems. Increasing the amount of behavioural support by healthcare providers is likely to increase the chance of success by about 10%-25% <sup>4</sup>.

Healthcare providers are ideally positioned to advise patients to quit smoking by providing effective brief intervention. Among all the healthcare providers, pharmacists play a significant role in smoking cessation as they are easily accessible by the public <sup>5</sup> and provide counselling without prior appointment and with no additional cost to the patients <sup>6</sup>. They communicate regularly with patients when advising the correct use of Nicotine Replacement Therapy (NRT) products. Family physicians also have a significant opportunity to decrease smoking as they are well-suited to offer effective counselling to their patients. First, they already have some knowledge about their patients and the social environment. Second, there is already a good rapport between family doctors and their patients that will contribute to the therapeutic

1  
2  
3 relationship. Third, most patients often come to family doctors believing that doctors can help  
4 them improve their condition <sup>7</sup>.  
5  
6  
7  
8  
9

10  
11 In order to tackle serious health problems arising from smoking, all healthcare providers are  
12 encouraged to be actively involved in smoking cessation services. The U.S. Public Health  
13 Service has recommended the use of Clinical Practice Guidelines (CPG) for tobacco cessation.  
14 The tobacco cessation clinical practice guideline is a brief intervention known by the acronym  
15 of the “5 A’s” and has been effective in both research and clinical practice <sup>8,9</sup>. Increasing the  
16 implementation of CPG by various healthcare providers is likely to lead to more smokers  
17 exposed to evidence-based treatments, more smokers quitting and reduce the prevalence of  
18 smoking and smoking-related disease <sup>8</sup>. Despite evidence that shows the effectiveness of brief  
19 interventions even in a busy clinical environment, dissemination is very slow and many  
20 healthcare providers still do not follow the CPG <sup>10</sup>. Healthcare providers reported they  
21 performed the first two “A’s” which are “Ask” and “Advise” <sup>11</sup>. However, limited evidence has  
22 been reported on the performance on the three remaining steps, which are “Assess”, “Assist”  
23 and “Arrange” <sup>12</sup>. According to the National Ambulatory Medical Care Survey, between 2001  
24 and 2004, 32% of patient charts did not include their smoking status, more than 80% of smokers  
25 did not receive assistance and only 0.3% and 1.8% received NRT and bupropion treatments,  
26 respectively <sup>13</sup>. Only 19.8% of current smokers received any cessation assistance through  
27 counselling, medication or both. Even during preventive care visits, only 28.9% received  
28 cessation assistance <sup>14</sup>.  
29  
30  
31  
32  
33  
34  
35  
36  
37  
38  
39  
40  
41  
42  
43  
44  
45  
46  
47  
48  
49  
50  
51  
52  
53  
54  
55  
56

57 Like many other countries, Malaysia is facing challenges in tobacco control. Based on the 2011  
58 Malaysian National Health and Morbidity Survey, 67.6% of the current smokers who visited  
59  
60

1  
2  
3 healthcare services in the past 12 months were asked about their smoking status, and 52.6%  
4 was advised to quit smoking by healthcare providers <sup>15</sup>. In 2015, 75.4% of the current smokers  
5 who visited healthcare services in the past 12 months was advised to quit smoking by healthcare  
6 providers <sup>16</sup>. Unfortunately, no evidence has been documented on healthcare providers  
7 performing the three remaining steps.  
8  
9

10  
11  
12  
13  
14  
15  
16  
17  
18 Translating this guideline into practise remains a challenge because nicotine dependence is a  
19 chronic relapsing condition <sup>8</sup> that requires continuous effort to achieve success by preventing  
20 relapse. Although in many countries, more than half of the current smokers want to quit  
21 smoking, and one-third had made at least three quit attempts, less than half of smokers succeed  
22 in quitting smoking before the age of 60 <sup>15-19</sup>. Several barriers to intervention have been  
23 discussed including lack of knowledge, negative healthcare providers' attitude, low self-  
24 efficacy, lack of training <sup>20</sup>, competing priorities and believing that counselling was not an  
25 appropriate service <sup>21</sup>, barriers of time, manpower and finance, lack of skills, concern for the  
26 clinician-patient relationship and perception of insufficient patient motivation <sup>22</sup>. Smoking  
27 among healthcare providers is also prevalent in many countries, and those who smoked were  
28 less likely to advise patients to stop smoking <sup>23</sup>. Healthcare providers also claimed that they  
29 lack knowledge in smoking cessation counselling techniques and confidence in smoking  
30 cessation programme <sup>24</sup>. The most significant barrier in providing smoking cessation  
31 intervention is due to limited training of healthcare providers <sup>3 25 26</sup>.  
32  
33  
34  
35  
36  
37  
38  
39  
40  
41  
42  
43  
44  
45  
46  
47  
48  
49  
50

51  
52 According to the 4<sup>th</sup> Edition of Tobacco Atlas, doctors often informed patients about the  
53 harmful effects of smoking, but they lack smoking cessation behavioural and pharmacotherapy  
54 intervention training to help their patients stop using tobacco products <sup>27</sup>. Therefore, there is a  
55 gap between the needs of the patients and the ability of healthcare providers to help them <sup>17</sup>.  
56  
57  
58  
59  
60



1  
2  
3 To address the gap, training including face-to-face and online training have been developed to  
4 improve smoking cessation competency and proficiency. These training programmes have  
5 shown to be effective in enhancing the counselling knowledge, skills and confidence of  
6 healthcare providers and their performance in smoking cessation intervention <sup>28-33</sup>. The meta-  
7 analyses by Cochrane Collaboration also showed healthcare providers who received specific  
8 training had a higher probability of performing smoking cessation intervention to help their  
9 patients to stop smoking compared to their untrained controls counterparts <sup>3 25</sup>. Pharmacists  
10 receiving online training followed by a role-play session can counsel for smoking cessation <sup>34</sup>.  
11 A study by Cornuz in Switzerland showed that non-pharmacological smoking cessation  
12 interventions with active learning methods and practice with standardised patients by doctors  
13 produce better abstinence rates, provide better counselling and have a higher number of  
14 smokers willing to quit compared with other healthcare providers <sup>25</sup>.

15 On the other hand, nurses are well-positioned to deliver effective smoking cessation  
16 intervention with minimal investment in training. A one-hour training of smoking cessation  
17 has shown a significant increase in knowledge and attitude compared to prior training <sup>33</sup>.  
18 Unfortunately, evidence suggests that a minimal number of healthcare providers have received  
19 even minimal training on smoking cessation treatment <sup>35</sup>.

20  
21  
22 Article 14 of the World Health Organisation (WHO) Framework Convention on Tobacco  
23 Control (FCTC) states that “each party shall develop and disseminate appropriate,  
24 comprehensive and integrated guidelines based on scientific evidence and best practices, taking  
25 into account national circumstances and priorities, and shall take effective measures to promote  
26 cessation of tobacco use and adequate treatment for tobacco dependence” <sup>36</sup>. One of the critical  
27 resources needed to implement Article 14 is sufficient numbers of healthcare providers trained  
28 to assess tobacco use and deliver brief advice about smoking cessation <sup>37</sup>. In line with this,  
29  
30  
31  
32  
33  
34  
35  
36  
37  
38  
39  
40  
41  
42  
43  
44  
45  
46  
47  
48  
49  
50  
51  
52  
53  
54  
55  
56  
57  
58  
59  
60

1  
2  
3 Malaysia has developed a National Strategic Plan for Tobacco Control to achieve a tobacco-  
4 free nation by 2045 with the target of less than 5% tobacco use prevalence. Currently, a  
5 smoking cessation training programme called SCOPE has been successfully developed and  
6 introduced since 2009 by a group of researchers from Nicotine Addiction Research Group of  
7 University of Malaya Centre for Addiction Sciences (UMCAS). SCOPE is part of mQuit  
8 services recognised as one of the three pathways to become a certified smoking cessation  
9 provider in Malaysia.<sup>38</sup> Since the majority of the primary care providers play an essential role  
10 as front liners in promoting smoking cessation and offering support to tobacco users, the  
11 SCOPE module has been designed for different disciplines of healthcare providers (e.g.,  
12 doctors, dentists, pharmacists, nurses, medical assistants) to increase knowledge and best  
13 practices in smoking cessation in Malaysia <sup>38</sup>. The engagement of different disciplines of  
14 healthcare providers aligns with the evidence suggesting that the intervention delivered by any  
15 single type of healthcare provider (e.g., doctors, dentists, nurses, psychologists) or multiple  
16 healthcare providers improves the abstinence rate compared with no intervention without  
17 healthcare providers (e.g., self-help) <sup>8</sup>. A higher cessation rate will be achieved with more  
18 intensive and frequent contacts with healthcare providers <sup>4</sup>.

19  
20  
21  
22  
23  
24  
25  
26  
27  
28  
29  
30  
31  
32  
33  
34  
35  
36  
37  
38  
39  
40  
41  
42  
43 Thus, the purpose of this study was to assess the pre- and post-training results from the eight-  
44 hour SCOPE training on smoking cessation. We hypothesised that the training would increase  
45 smoking cessation-related knowledge, attitude and self-efficacy for all disciplines of healthcare  
46 providers including doctors, pharmacists, medical assistants and nurses.  
47  
48  
49  
50  
51

## 52 53 54 55 56 **Methods**

### 57 58 59 **Development of SCOPE training** 60

1  
2  
3 SCOPE is a comprehensive, one-day programme developed from the ‘Empowering Dentist  
4 into smoking cessation programme’ (2009-2013) by the Nicotine Addiction Research Group  
5 of the UMCAS team who recognised the need to offer intensive smoking cessation  
6 counselling<sup>39</sup>. The module was developed primarily by Amer Siddiq Amer Nordin (ASAN), a  
7 psychiatrist and addiction medicine specialist and Farizah Mohd Hairi (FMH), a public health  
8 specialist and tobacco control expert. The module was reviewed and vetted by local and  
9 international experts to strengthen the content. The primary aim of the SCOPE training was to  
10 prepare healthcare providers to be competent and confident to assist smokers in quitting  
11 through evidence-based smoking cessation treatment.  
12  
13  
14  
15  
16  
17  
18  
19  
20  
21  
22  
23  
24  
25  
26  
27

28 The content of the training includes knowledge on the basic science of tobacco use and clinical  
29 science of tobacco treatment. This training outlined three components, including interactive  
30 lectures (questions and answer sessions, video presentation and quiz), practical session and  
31 role-play demonstration. The lectures consist of the following topics: introduction, tobacco  
32 control and policy, national strategic plan, harm to health, smoking as an addiction,  
33 pharmacological therapy and behavioural therapy in smoking cessation. The practical session  
34 consists of assessment on how to use tobacco dependence instrument, Fagerstrom Test Nicotine  
35 Dependence (FTND), and how to monitor carbon monoxide level using smokerlyzer as well  
36 as how to run the quit smoking clinic. A 35-minute practical session consisted of facilitators  
37 demonstrating how to use piCO™ Bedfont smokerlyzer followed by a small group  
38 demonstration guided by facilitators. All the participants have the opportunity to test the device  
39 and practice using FTND. The participants are also given guidelines to set up a quit standard  
40 quit smoking clinic approved by MoH. The goal of the role-play session was to provide  
41 participants with guided, hands-on practice in addressing tobacco treatment for patients. A 45  
42 minutes session of role-playing representing various cases of tobacco treatment with three  
43  
44  
45  
46  
47  
48  
49  
50  
51  
52  
53  
54  
55  
56  
57  
58  
59  
60

1  
2  
3 different scenarios (for example, patients at different stages of change – pre-contemplation,  
4 contemplation, preparation, action and maintenance). Role-play was based on the 5 A's  
5 counselling approach where the participants acted as smoking cessation providers, and the  
6 facilitator acted as a patient. Afterwards, the facilitators led a brief discussion on challenges in  
7 healthcare providers-delivered tobacco treatment.  
8  
9  
10  
11  
12  
13  
14  
15  
16  
17

18 Education materials provided to the healthcare providers included digital and print copies of  
19 the SCOPE handbook. A copy of screening tool for nicotine dependence, Fagerstrom test and  
20 smokerlyzer chart for monitoring carbon monoxide levels in the lung was given to each  
21 healthcare provider to facilitate the process of smoking cessation intervention. Healthcare  
22 providers attended only one training session led by ASAN or FMH without booster sessions,  
23 reminder or other follow-up training sessions.  
24  
25  
26  
27  
28  
29  
30  
31  
32  
33  
34  
35

### 36 **Study design and participants**

37  
38 A pre-post study design was conducted among healthcare providers who attended the 8-hour  
39 SCOPE training over a period of three months, starting from December 2016 to February 2017.  
40  
41 The study population comprised a group of healthcare providers with different grades and  
42 specialities working at government health clinics in Malaysia. A total of 218 healthcare  
43 providers who completed the training and returned the pre- and post-survey were included in  
44 this study. The healthcare providers consist of medical doctors (n=98), medical assistants  
45 (n=44), pharmacists (n=42) and nurses (n=34).  
46  
47  
48  
49  
50  
51  
52  
53  
54  
55  
56  
57

### 58 **Evaluation tool**

59  
60

1  
2  
3 A validated evaluation tool called ProSCiTE (supplementary file) was administered to the  
4 participants before and after the training programme<sup>40 41</sup>. ProSCiTE was initially developed  
5 and validated by Siti Idayu Hasan (SIH). It consists of 67 items which are divided into five  
6 main constructs including knowledge (12 items), attitude (8 items), self-efficacy (13 items),  
7 behaviour (19 items) and barriers (15 items) on smoking cessation intervention. However, only  
8 demographic background and three constructs (knowledge, attitude and self-efficacy) were  
9 measured in this study to determine the immediate impact of SCOPE training. The  
10 demographic characteristics assessed were age, gender, education level, working experience,  
11 smoking status and type of profession. Knowledge of smoking cessation withdrawal symptoms  
12 was assessed with 12 items with Yes (1) or No (0) response which yielded a total maximum  
13 score of 12. Attitude was assessed using eight items rated by a five-point Likert scale from  
14 strongly disagree (1), disagree (2), neither disagree/agree (3), agree (4) and strongly agree (5)  
15 which yielded a total maximum score of 40. Self-efficacy was assessed using 13 items by a  
16 five-point Likert scale from certainly not (1), probably not (2), neutral (3), probably (4) and  
17 certainly (5), which yielded a total maximum score of 65. Construct validity based on  
18 eigenvalues and factor loadings to confirm the factor structure (knowledge, attitude, self-  
19 efficacy) was acceptable. The internal consistency and reliability of factor constructs were  
20 excellent for knowledge ( $\alpha = 0.93$ ) and self-efficacy ( $\alpha = 0.93$ ) and good for attitude (0.88)<sup>41</sup>.  
21  
22  
23  
24  
25  
26  
27  
28  
29  
30  
31  
32  
33  
34  
35  
36  
37  
38  
39  
40  
41  
42  
43  
44  
45  
46  
47

## 48 **Study procedures**

49  
50  
51 A representative sample from each health clinic was selected randomly from the list of  
52 healthcare providers provided by the State Health Department. The eligible healthcare  
53 providers, including local healthcare providers working in the government sector and never  
54 attended SCOPE training were invited and scheduled for this study. Participation in this study  
55  
56  
57  
58  
59  
60

1  
2  
3 was voluntary. Participants were briefed regarding the purpose of the study before the training  
4 was conducted. The providers were awarded Continuing Professional Development (CPD)  
5 credit after completing the training. The pre-test survey was administered immediately before  
6 the training, and a post-test survey was administered immediately after the training.  
7  
8  
9  
10  
11  
12  
13  
14  
15

### 16 **Ethical approval**

17  
18  
19 This study was approved by the Medical Ethics Committee of the University of Malaya  
20 (Reference number: UM.TNC2/RC/H&E/UMREC-118) and the Ministry of Health Malaysia  
21 (Reference number: NMRR-16-2144-32353 (IIR)). Healthcare providers were informed, and  
22 they gave consent before the pre-training survey prior to the SCOPE training.  
23  
24  
25  
26  
27  
28  
29  
30  
31

### 32 **Data analysis**

33  
34  
35 Data were analysed with IBM SPSS version 22. Descriptive analyses were performed on the  
36 demographic items. Paired samples t-tests were used to compare pre- and post-test results. The  
37 level of statistical significance was set to  $p < 0.05$  for all analyses.  
38  
39  
40  
41  
42  
43  
44

### 45 **Patient and public involvement**

46  
47  
48 This is a pre- and post-study from different healthcare disciplines and providers including  
49 doctors, pharmacists, medical assistants and nurses. No patients were involved in this study.  
50  
51 All eligible healthcare providers were briefed on the purpose of the study, its benefit and  
52 potential harm. The study findings will be disseminated through academic publications and  
53 presentations, newspapers, printed and digital media, media interview and presented to the  
54  
55  
56  
57  
58  
59  
60 Ministry of Health Malaysia.

## Results

### Healthcare provider characteristics

Nearly half (44.9%) of the healthcare providers were doctors. Their mean age was 32.59 (6.69), ranging from 23 to 55 years. Their mean working experience was 7.26 (5.80), ranging from 1 to 34 years. Almost two-quarters (64.7%) were female, and almost half (45.9%) of them obtained a bachelor's degree. The majority reported that they are non-smokers (88.8%), and there are no current smokers in all professions except for medical assistants (See Table 1).

## Changes in knowledge, attitudes and self-efficacy on smoking cessation intervention due to training

The results of the paired samples t-test show that mean knowledge differs before training ( $M = 7.96$ ,  $SD = 2.34$ ) and after training ( $M = 10.35$ ,  $SD = 1.57$ ) at the .001 level of significance ( $t = 15.32$ ,  $df = 206$ ,  $n = 207$ ,  $p < 0.001$ , 95% CI for mean difference 2.08 to 2.70). On average, the knowledge score was about 2.39 points higher after training. Each item in knowledge increased significantly after the training except for restlessness, diarrhoea and the urge to smoke. It was also found that healthcare providers' knowledge on mouth ulcers as a withdrawal symptom for nicotine addiction gains the greatest change in score followed by constipation. Before the training, most healthcare providers did not know that constipation was one of the withdrawal symptoms for nicotine addiction (See Table 2).

The results of the paired sample t-test also show that mean attitude differs before training ( $M = 34.32$ ,  $SD = 4.12$ ) and after training ( $M = 37.04$ ,  $SD = 3.92$ ) at the .001 level of significance ( $t = 8.24$ ,  $df = 206$ ,  $n = 207$ ,  $p < 0.001$ , 95% CI for mean difference 2.07 to 3.37). On average, the attitude score was about 2.72 points higher after training. Each item in attitude increased significantly after the training. The attitude of healthcare providers who wanted to advise patients to stop using tobacco products gained the greatest change. Also, the likelihood of patients quitting smoking increases if the healthcare provider advises patients to quit. Before the training, it showed that attitude towards asking parents/guardian on the effect of second-hand smoke was the lowest. However, after the training, the attitude towards second-hand smoke increased (See Table 3).



1  
2  
3 A significant increase in healthcare providers' self-efficacy was also found when pre- and post-  
4 training was compared. Among the three measures, self-efficacy scores provide greatest  
5 changes after the training. Results of the paired sample t-test also show that mean self-efficacy  
6 differs before training ( $M = 40.31$ ,  $SD = 8.61$ ) and after training ( $M = 54.67$ ,  $SD = 7.45$ ) at  
7 the .001 level of significance ( $t = 23.22$ ,  $df = 206$ ,  $n = 207$ ,  $p < 0.001$ , *95% CI for mean*  
8 *difference* 13.14 to 15.58). On average, healthcare providers' post-training score was 14.36  
9 points higher than their pre-training score. Each item in self-efficacy increased significantly  
10 after the training. Practical and assessment module on how to detect carbon monoxide in their  
11 breath using a smokerlyzer depicted the greatest change in score followed by pharmacological  
12 therapy to assist smokers in quitting and behavioural therapy to prescribe medication to treat  
13 smokers. Healthcare providers have the lowest confidence in using the smokerlyzer before the  
14 training. However, it showed greater improvement from the practical session in the training  
15 (See Table 4).  
16  
17  
18  
19  
20  
21  
22  
23  
24  
25  
26  
27  
28  
29  
30  
31  
32  
33  
34  
35  
36  
37  
38  
39  
40  
41  
42  
43  
44  
45  
46  
47  
48  
49  
50  
51  
52  
53  
54  
55  
56  
57  
58  
59  
60

### **Changes in knowledge, attitudes and self-efficacy on smoking cessation intervention due to training for each profession**

The paired sample t-test in Figure 1 revealed significant increases in all four professions and measures. Mean knowledge for nurses differs before training ( $M = 7.36$ ,  $SD = 2.66$ ) and after training ( $M = 10.12$ ,  $SD = 2.32$ ) at the .001 level of significance ( $t = 5.26$ ,  $df = 32$ ,  $n = 33$ ,  $p < 0.001$ , *95% CI for mean difference* 1.69 to 3.82). Mean knowledge for medical assistant differs before training ( $M = 7.00$ ,  $SD = 2.47$ ) and after training ( $M = 9.72$ ,  $SD = 1.89$ ) at the .001 level of significance ( $t = 7.26$ ,  $df = 38$ ,  $n = 39$ ,  $p < 0.001$ , *95% CI for mean difference* 1.96 to 3.48). Mean knowledge for doctors differs before training ( $M = 8.38$ ,  $SD = 2.19$ ) and after training ( $M = 10.66$ ,  $SD = 1.22$ ) at the .001 level of significance ( $t = 10.70$ ,  $df = 92$ ,  $n = 93$ ,  $p < 0.001$ ,

95% CI for mean difference 1.86 to 2.70). Mean knowledge for pharmacists differs before training ( $M = 8.40$ ,  $SD = 1.93$ ) and after training ( $M = 10.45$ ,  $SD = 1.11$ ) at the .001 level of significance ( $t = 7.24$ ,  $df = 41$ ,  $n = 42$ ,  $p < 0.001$ , 95% CI for mean difference 1.48 to 2.62).

Mean attitude for nurses differs before training ( $M = 34.76$ ,  $SD = 3.39$ ) and after training ( $M = 37.33$ ,  $SD = 3.53$ ) at the .001 level of significance ( $t = 3.70$ ,  $df = 32$ ,  $n = 33$ ,  $p < 0.001$ , 95% CI for mean difference 1.16 to 4.00). Mean attitude for medical assistant differs before training ( $M = 32.72$ ,  $SD = 3.80$ ) and after training ( $M = 35.59$ ,  $SD = 3.80$ ) at the .001 level of significance ( $t = 4.15$ ,  $df = 38$ ,  $n = 39$ ,  $p < 0.001$ , 95% CI for mean difference 1.47 to 4.27). Mean attitude for doctors differs before training ( $M = 34.63$ ,  $SD = 4.47$ ) and after training ( $M = 37.39$ ,  $SD = 4.22$ ) at the .001 level of significance ( $t = 4.68$ ,  $df = 92$ ,  $n = 93$ ,  $p < 0.001$ , 95% CI for mean difference 1.58 to 3.92). Mean attitude for pharmacists differs before training ( $M = 34.78$ ,  $SD = 3.56$ ) and after training ( $M = 37.40$ ,  $SD = 3.44$ ) at the .001 level of significance ( $t = 5.03$ ,  $df = 41$ ,  $n = 42$ ,  $p < 0.001$ , 95% CI for mean difference 1.59 to 3.67).

Mean self-efficacy for nurses differs before training ( $M = 34.48$ ,  $SD = 10.41$ ) and after training ( $M = 52.73$ ,  $SD = 9.17$ ) at the .001 level of significance ( $t = 10.95$ ,  $df = 32$ ,  $n = 33$ ,  $p < 0.001$ , 95% CI for mean difference 12.41 to 18.08). Mean self-efficacy for medical assistant differs before training ( $M = 40.23$ ,  $SD = 7.44$ ) and after training ( $M = 51.92$ ,  $SD = 6.31$ ) at the .001 level of significance ( $t = 10.18$ ,  $df = 38$ ,  $n = 39$ ,  $p < 0.001$ , 95% CI for mean difference 9.37 to 14.02). Mean self-efficacy for doctors differs before training ( $M = 41.35$ ,  $SD = 8.54$ ) and after training ( $M = 56.36$ ,  $SD = 6.91$ ) at the .001 level of significance ( $t = 15.16$ ,  $df = 92$ ,  $n = 93$ ,  $p < 0.001$ , 95% CI for mean difference 13.04 to 16.80). Mean self-efficacy for pharmacists differs

1  
2  
3 before training ( $M = 40.31$ ,  $SD = 8.00$ ) and after training ( $M = 55.02$ ,  $SD = 7.21$ ) at the .001  
4 level of significance ( $t = 10.19$ ,  $df = 41$ ,  $n = 42$ ,  $p < 0.001$ , 95% CI for mean difference 11.80  
5 to 17.63).  
6  
7  
8  
9

10  
11  
12  
13  
14  
15 Nurses obtain the most significant changes for knowledge score with an increase of 2.76 points,  
16 followed by medical assistants (2.72), doctors (2.28) and pharmacists (2.05). On attitude,  
17 medical assistants gained the most significant changes with an increase of 2.87 points, followed  
18 by doctors (2.75), pharmacist (2.62) and nurses (2.58). Similar results were also found for self-  
19 efficacy, where nurses gained the most significant changes with an increase of 15.24 points,  
20 followed by doctors (15.01), pharmacists (14.71) and medical assistants (11.69).  
21  
22  
23  
24  
25  
26  
27  
28  
29  
30  
31  
32

33 Post-training results showed that doctors and pharmacists obtained the highest score for  
34 knowledge, pharmacists for attitude and doctors for self-efficacy. The lowest scored were  
35 recorded for nurses and medical assistants seen in both pre-training and post-training for all  
36 measures.  
37  
38  
39  
40  
41  
42  
43  
44  
45  
46  
47

## 48 Discussion

49 This study evaluated a tailored-smoking cessation training for healthcare providers based on  
50 lectures, practical sessions and role-play. Our study showed significant improvement in  
51 healthcare providers' knowledge, attitude and self-efficacy in smoking cessation intervention.  
52 This was also the first evaluation of such training intervention among healthcare providers  
53 using the 5 A's approach in the Malaysian context. These findings indicate that knowledge,  
54  
55  
56  
57  
58  
59  
60

1  
2  
3 attitude and self-efficacy did not differ much among the different disciplines of healthcare  
4 providers, and improved significantly as a result of their participation in SCOPE training. Prior  
5 to the training, pharmacists had higher scores on both knowledge and attitude while doctors  
6 had higher scores on self-efficacy related to smoking cessation. After the training, a higher  
7 knowledge score was obtained by both pharmacists and doctors, attitude score by pharmacists  
8 and self-efficacy score by doctors. Although nurses and medical assistants had slightly lower  
9 scores for each measure, they gained the most significant change after the training. The gaps  
10 in the baseline score among medical assistants and nurses indicated that these groups had  
11 minimal exposure to smoking cessation prior to the training. This finding is also in line with a  
12 study in Arkansas, United States, which found that nurses' score on knowledge and self-  
13 efficacy was lower than doctors<sup>10</sup>. The results from this study suggest that training in smoking  
14 cessation is effective in the short-term and can provide better knowledge, positive attitude and  
15 improve their confidence level in assisting smokers to quit smoking using the 5A's smoking  
16 cessation intervention particularly among the nurses and medical assistants.

17  
18  
19  
20  
21  
22  
23  
24  
25  
26  
27  
28  
29  
30  
31  
32  
33  
34  
35  
36  
37  
38  
39 This present study recorded significant improvements in knowledge, attitude and self-efficacy  
40 after the SCOPE training. It is in agreement with previous studies in which healthcare providers  
41 have reported improvements in knowledge, attitude and self-efficacy in smoking cessation  
42 intervention after training<sup>3 10 33 42-48</sup>. This study suggests that the smoking status among SCOPE  
43 participants is essential, whereby there are no current smokers among the doctors, pharmacists  
44 and the nurses. When compared with a study conducted in Bosnia Herzegovina, where there is  
45 no established smoking cessation programme, more than half of the nurses who worked at the  
46 Family Medicine teaching centre smoke, and about 40% of their doctors smoke. The smokers  
47 among these professionals would most likely not advocate their patients for smoking cessation  
48 despite agreeing that smoking is harmful to health and would not advise young adults to start  
49  
50  
51  
52  
53  
54  
55  
56  
57  
58  
59  
60

1  
2  
3 smoking<sup>49</sup>. Previous studies also reported that non-smoking healthcare providers had more  
4  
5 positive attitudes towards the hospital's smoke-free policy compared to smokers<sup>50 51</sup>. With the  
6  
7 SCOPE programme, in the attitude component, the training improved their attitude towards  
8  
9 advocating and advising patients to stop smoking. This showed the importance of having a  
10  
11 structured and well-organised smoking cessation programme to better assist healthcare  
12  
13 providers in Malaysia in helping patients to quit smoking. When participants were asked to  
14  
15 give their responses regarding their attitude towards providing smoking cessation intervention  
16  
17 to their patients, it showed significant improvement post-training, particularly for second-hand  
18  
19 smoke. This evidence supports that healthcare providers are aware of the importance of  
20  
21 identifying and advising patients on the harmful effects of second-hand smoke. The more  
22  
23 positive attitude, particularly among medical assistants, which was observed after the training  
24  
25 also suggests that our healthcare providers are aware of their role and are ready to implement  
26  
27 smoking cessation in practice.  
28  
29  
30  
31  
32  
33  
34  
35  
36

37 A systematic review of the belief and attitude of physicians in the United Kingdom revealed  
38  
39 that the three most prevalent negative beliefs concerned the time needed to discuss smoking, a  
40  
41 perceived lack of effectiveness of such discussions, and a perceived lack of skill in conducting  
42  
43 such discussions<sup>52</sup>. As skill is concerned, training in smoking cessation can increase the level  
44  
45 of confidence among quit smoking providers, and with experience, can reduce the consultation  
46  
47 time and increase the effectiveness of consultation. Although most healthcare providers already  
48  
49 have positive attitude scores towards smoking cessation intervention at pre-training, the mean  
50  
51 total attitude scores increased significantly at post-training. This reflected that the training  
52  
53 could help healthcare providers understand their role in providing smoking cessation  
54  
55 intervention. Thus, it is vital to equip them with skills to competently assist smokers in quitting  
56  
57  
58  
59  
60<sup>53</sup>.

1  
2  
3  
4  
5  
6 The findings also suggested that there is a potential benefit by training all healthcare providers,  
7 particularly in self-efficacy. However, when self-efficacy was explored by each item, it was  
8 apparent that they lacked confidence concerning the component of the 5A's at pre-training with  
9 "Ask" and "Advise" being higher and "Assess", "Assist" and "Arrange" somewhat lower. The  
10 confidence level was increased for all of these 5A's after the training primarily "Assist" and  
11 "Assess". It showed that SCOPE training can increase the knowledge, attitude and self-efficacy  
12 of healthcare providers. Our result is in accordance with previous studies suggesting that simple  
13 activities like "Ask" and "Advise" are supported by existing systems that prompt good  
14 performance whereas "Assess", and "Assist" require more complex skill sets. In addition, a  
15 higher degree of coordinated clinic system is needed to "Arrange" follow-up cases for  
16 clinicians. There is a need for an integrated system-based approach involving multiple top-  
17 down stakeholders and environmental factors with the goal of connecting administrators,  
18 clinicians and staff to develop effective strategies to provide smokers with smoking cessation  
19 intervention<sup>47</sup>. Apart from that, updated clinical practise guidelines for treating tobacco use  
20 and dependence as emphasised the increasing evidence that the healthcare system significantly  
21 affects the likelihood that smokers receive effective smoking cessation intervention<sup>9</sup>. We  
22 suggest that video demonstration, role-play<sup>54</sup>, and practical sessions play a vital role to help in  
23 increasing the confidence of healthcare providers in providing more complex 5 A's  
24 components. Role-play sessions could prepare them to provide effective intervention with more  
25 confidence to assess and assist patients from ambivalence to change, and then offering them  
26 with appropriate behavioural and pharmacotherapy intervention.  
27  
28  
29  
30  
31  
32  
33  
34  
35  
36  
37  
38  
39  
40  
41  
42  
43  
44  
45  
46  
47  
48  
49  
50  
51  
52  
53  
54  
55  
56  
57  
58  
59  
60

1  
2  
3 With respect to self-efficacy, SCOPE training increased healthcare providers' confidence to  
4 use a smokerlyzer followed by behavioural therapy and pharmacotherapy thus suggesting that  
5 more emphasis should be made for this training module as the pre-training score is lowest. This  
6 supported the evidence that training on smoking cessation should be widely and continuously  
7 provided to all healthcare providers to prepare them to be competent in assisting smokers using  
8 all the 5 A's smoking cessation intervention components.  
9  
10  
11  
12  
13  
14  
15  
16  
17  
18  
19  
20

21 Nevertheless, our study has limitations. Firstly, it relies on the self-reported response from our  
22 healthcare providers. Data must be interpreted carefully as there is the possibility of healthcare  
23 providers tending to over-report the frequency of smoking cessation intervention <sup>45</sup>. The  
24 healthcare providers involved in this study were only from three out of 14 states in Malaysia.  
25 Thus, generalising the findings to the overall population of healthcare providers should be done  
26 with caution. The nature of pre- and post-study lacks a control group for the intervention, and  
27 without long-term follow-up, it does not indicate a causal relationship between the impact of  
28 the training on the healthcare providers' behaviour and smoking cessation outcome. This study  
29 also does not include implementation data and, therefore, no data is available to suggest that  
30 changes of knowledge, attitude and self-efficacy translate into practice. Future study should  
31 consider having a control group, preferably in a larger sample to improve the significance of  
32 this study and patients' smoking cessation outcome. This study could explore their attitude  
33 towards smoking cessation advice, where in-depth questions or a qualitative approach would  
34 help answer this section on attitude. Even though knowledge has been greatly improved in this  
35 study, the duration of the information retained is not measured as no follow-up study was done.  
36 Evidence showed that knowledge can be maintained beyond a three-month follow-up period  
37 except for brief advice component, which decreased at three months <sup>43</sup>. Thus, continuing  
38 professional course for smoking cessation should be done frequently.  
39  
40  
41  
42  
43  
44  
45  
46  
47  
48  
49  
50  
51  
52  
53  
54  
55  
56  
57  
58  
59  
60

## Conclusion

In conclusion, this study demonstrates that SCOPE training improved healthcare providers' knowledge, attitude and self-efficacy on smoking cessation intervention. Continuous future training is recommended to better equip healthcare providers with the latest knowledge, right attitude and high self-efficacy to integrate what they have learned into their practice successfully.

## Conflict of interest

The authors have no competing interest to declare.

## Funding

This study was funded by the University of Malaya Grand Challenge Research Grant, Health & Wellbeing Research Cluster (GC004A-15HTM).

## Acknowledgements

The authors would like to express our sincere gratitude to the speakers from NARCC group and healthcare providers for their generous contribution to this project.

## Author statement



1  
2  
3 SIH was responsible for the study design, data collection, analysis and drafted the manuscript.  
4  
5 FMH was responsible for developing training module, supervising and reviewing manuscript.  
6  
7 Amani @ Natasha was involved in the reviewing manuscript. ASAN was responsible for  
8  
9 developing the training module, supervising and reviewing the manuscript, as well as  
10  
11 investigating this study. All authors critically reviewed the manuscript and approved the final  
12  
13 version.  
14  
15

#### 16 17 18 19 20 21 Data sharing statement

22  
23 All the data for the study is stored at the Nicotine Addiction Research Group, UMCAS in  
24  
25 University of Malaya, Kuala Lumpur, Malaysia. Only team members have access to the raw  
26  
27 data for the sole purpose of dissemination of the results. Data analysis is ongoing.  
28  
29

#### 30 31 32 33 34 35 36 37 38 39 40 41 42 43 44 45 46 47 48 49 50 51 52 53 54 55 56 57 58 59 60 References

1. WHO. WHO global report on trends in prevalence of tobacco smoking 2015. 2015
2. Alberg AJ, Shopland DR, Cummings KM. The 2014 Surgeon General's Report: Commemorating the 50th Anniversary of the 1964 Report of the Advisory Committee to the US Surgeon General and Updating the Evidence on the Health Consequences of Cigarette Smoking. *American Journal of Epidemiology* 2014;179(4):403-12. doi: 10.1093/aje/kwt335
3. Carson KV VM, Crone MR, Brinn MP, Esterman AJ, Assendelft WJJ, Smith BJ. . Training health professionals in smoking cessation. . *Cochrane Database of Systematic Reviews* 2012; Art. No.: CD000214(5) doi: 10.1002/14651858.CD000214.pub2
4. Stead L, Diana B, Nataly P, et al. Physician advice for smoking cessation. *Cochrane Database of Systematic Reviews* 2013;5 doi: 10.1002/14651858.CD000165.pub4.
5. Hudmon KS, Prokhorov AV, Corelli RL. Tobacco cessation counseling: Pharmacists opinions and practices. *Patient Education and Counseling* 2006;61(1):152-60. doi: 10.1016/j.pec.2005.03.009
6. Aquilino ML, Farris KB, Zillich AJ, et al. Smoking-Cessation Services in Iowa Community Pharmacies. *Pharmacotherapy: The Journal of Human Pharmacology and Drug Therapy* 2003;23(5):666-73. doi: 10.1592/phco.23.5.666.32192
7. Poon VHK. Model for counseling people in relationships. *Canadian Family Physician* 2007;53(2):237-38.
8. Fiore MC, Jaén CR, Baker TB. Treating Tobacco Use and Dependence:2008 Update.Clinical Practice Guideline. Rockville, MD: U.S. Department of Health and Human Services. Public Health Service 2008.
9. Siu AL, for the USPSTF. Behavioral and pharmacotherapy interventions for tobacco smoking cessation in adults, including pregnant women: U.s. preventive services task force recommendation statement. *Annals of Internal Medicine* 2015;163(8):622-34. doi: 10.7326/M15-2023

10. Sheffer CE, Barone CP, Anders ME. Training health care providers in the treatment of tobacco use and dependence: pre- and post-training results. *Journal of Evaluation in Clinical Practice* 2009;15(4):607-13. doi: 10.1111/j.1365-2753.2008.01058.x
11. Quinn VP, Hollis JF, Smith KS, et al. Effectiveness of the 5-As Tobacco Cessation Treatments in Nine HMOs. *Journal of General Internal Medicine* 2009;24(2):149-54. doi: 10.1007/s11606-008-0865-9
12. Rigotti NA. Training Future Physicians to Deliver Tobacco Cessation Treatment. *Journal of General Internal Medicine* 2016;31(2):144-46. doi: 10.1007/s11606-015-3560-7
13. Ferketich AK, Khan Y, Wewers ME. Are physicians asking about tobacco use and assisting with cessation? Results from the 2001-2004 national ambulatory medical care survey (NAMCS). *Prev Med* 2006;43 doi: 10.1016/j.ypmed.2006.07.009
14. Jamal A, R DS, Babb SD, et al. Tobacco Use Screening and Cessation Assistance During Physician Office Visits Among Persons Aged 11–21 Years — National Ambulatory Medical Care Survey, United States, 2004–2010. *MMWR Morb Mortal Wkly Rep* 2014;63(2):71-79.
15. IPH. Report of the Global Adult Tobacco Survey (GATS) Malaysia, 2011, Ministry of Health Malaysia 2011
16. IPH. National Health and Morbidity Survey 2015 – Report on Smoking Status Among Malaysian Adults, Ministry of Health Malaysia. 2015
17. Wipfli H. The Tobacco Atlas, Fourth Edition. *American Journal of Epidemiology* 2012;176(12):1193-93. doi: 10.1093/aje/kws389
18. CDC. Quitting smoking among adults — United States, 2001–2010. *Morbidity and Mortality Weekly Report*. 2011;60:1513–19.
19. Cosci F. Nicotine dependence and psychological distress: outcomes and clinical implications in smoking cessation. *Psychology Research and Behavior Management* 2011:119. doi: 10.2147/prbm.s14243
20. Saito A, Nishina M, Murai K, et al. Health professional's perceptions of and potential barriers to smoking cessation care: a survey study at a dental school hospital in Japan. *BMC Research Notes* 2010;3(1):329.
21. Tong EK, Strouse R, Hall J, et al. National survey of U.S. health professionals' smoking prevalence, cessation practices, and beliefs. *Nicotine & Tobacco Research* 2010;12(7):724-33. doi: 10.1093/ntr/ntq071
22. Omole O, Ngobale K, Ayo-Yusuf O. Missed opportunities for tobacco use screening and brief cessation advice in South African primary health care: a cross-sectional study. *BMC Family Practice* 2010;11(1):94.
23. Al Hosani S, Al Ali M, Al-Marashda K, et al. Smoking Prevalence, Attitudes and Behaviors Primary Healthcare Providers and its Impact on Their Smoking Cessation Counseling Practices 2014.
24. Berman BA, Yancey AK, Bastani R, et al. African-American physicians and smoking cessation counseling. *Journal of the National Medical Association* 1997;89(8):534-42.
25. Cornuz J, Humair J-P, Seematter L, et al. Efficacy of Resident Training in Smoking Cessation A Randomized, Controlled Trial of a Program Based on Application of Behavioral Theory and Practice with Standardized Patients. *Annals of Internal Medicine* 2002;136(6):429-37.
26. Taha NA, Guat Tee O. Tobacco cessation through community pharmacies: Knowledge, attitudes, practices and perceived barriers among pharmacists in Penang. *Health Education Journal* 2015;74(6):681-90. doi: 10.1177/0017896914558643
27. Rojewski AM, Bailey SR, Bernstein SL, et al. Considering Systemic Barriers to Treating Tobacco Use in Clinical Settings in the United States. *Nicotine & Tobacco Research* 2018:nty123-nty23. doi: 10.1093/ntr/nty123
28. Brose LS, McEwen A, Michie S, et al. Treatment manuals, training and successful provision of stop smoking behavioural support. *Behaviour Research and Therapy* 2015;71:34-39. doi: <http://dx.doi.org/10.1016/j.brat.2015.05.013>

- 1
- 2
- 3
- 4 29. Brose LS, West R, Michie S, et al. Effectiveness of an online knowledge training and assessment
- 5 program for stop smoking practitioners. *Nicotine & Tobacco Research: Official Journal Of The*
- 6 *Society For Research On Nicotine And Tobacco* 2012;14(7):794-800. doi: 10.1093/ntr/ntr286
- 7
- 8 30. Martin BA, Bruskiwitz RH, Chewing BA. Effect of a tobacco cessation continuing professional
- 9 education program on pharmacists' confidence, skills, and practice-change behaviors. *Journal*
- 10 *of the American Pharmacists Association : JAPhA* 2010;50(1):9-16. doi:
- 11 10.1331/JAPhA.2010.09034
- 12
- 13 31. Hayes RB, Geller A, Churchill L, et al. Teaching tobacco dependence treatment and counseling skills
- 14 during medical school: Rationale and design of the Medical Students helping patients Quit
- 15 tobacco (MSQuit) group randomized controlled trial. *Contemporary Clinical Trials*
- 16 2014;37(2):284-93. doi: <http://dx.doi.org/10.1016/j.cct.2014.01.008>
- 17
- 18 32. Ockene JK, Hayes RB, Churchill LC, et al. Teaching Medical Students to Help Patients Quit Smoking:
- 19 Outcomes of a 10-School Randomized Controlled Trial. *Journal of General Internal Medicine*
- 20 2016;31(2):172-81. doi: 10.1007/s11606-015-3508-y
- 21
- 22 33. Sheffer CE, Barone C, Anders ME. Training Nurses in the Treatment of Tobacco Use and
- 23 Dependence: Pre- and Post-Training Results. *Journal of advanced nursing* 2011;67(1):176-83.
- 24 doi: 10.1111/j.1365-2648.2010.05483.x
- 25
- 26 34. Simansalam S, Brewster JM, Nik Mohamed MH. Training Malaysian Pharmacy Undergraduates
- 27 with Knowledge and Skills on Smoking Cessation. *American Journal of Pharmaceutical*
- 28 *Education* 2015;79(5):71. doi: 10.5688/ajpe79571
- 29
- 30 35. Steinberg MB, Alvarez MS, Delnevo CD, et al. Disparity of Physicians' Utilization of Tobacco
- 31 Treatment Services. *American Journal of Health Behavior* 2006;30(4):375-86. doi:
- 32 10.5993/AJHB.30.4.4
- 33
- 34 36. WHO. Guidelines for implementation of Article 14. 2019
- 35
- 36 37. Kruse GR, Rigotti NA, Raw M, et al. Tobacco Dependence Treatment Training Programs: An
- 37 International Survey. *Nicotine & Tobacco Research* 2016;18(5):1012-18. doi:
- 38 10.1093/ntr/ntv142
- 39
- 40 38. Amer Nordin AS, Mohd Hairi F, Ahmad Tajuddin NAN. Malaysia: mQuit strengthens quit smoking
- 41 strategy. *Tobacco Control* 2016;25:498-501.
- 42
- 43 39. Amer Siddiq AN, Rahimah AK, Nurul Asyikin Y, et al. Empowering Malaysian dentists to tobacco
- 44 dependence treatment conduct. *International Dental Journal* 2014;64(4):206-12. doi:
- 45 10.1111/idj.12110
- 46
- 47 40. Hasan SI, Mohd Hairi F, Danaee M, et al. Content validity for the questionnaire on Knowledge,
- 48 Attitude and Behaviour (KAB) towards smoking cessation intervention among health care
- 49 providers *Poster presented at Society for Research on Nicotine and Tobacco 23rd Annual*
- 50 *Meeting, 8-11 March 2017, Florence, Italy 2017*
- 51
- 52 41. Hasan SI, Mohd Hairi F, Amer Nordin AS. Construct Validity and Internal Consistency Reliability of
- 53 Providers Smoking Cessation Evaluation (ProSCiTE) Tool. *12th Asia Pacific Conference on*
- 54 *Tobacco or Health (APACT) 2018*
- 55
- 56 42. Herold R, Schiekirka S, Brown J, et al. Structured Smoking Cessation Training for Medical Students:
- 57 A Prospective Study. *Nicotine & Tobacco Research* 2016;18(12):2209-15. doi:
- 58 10.1093/ntr/ntw191
- 59
- 60 43. Jones LL, McEwen A. Evaluating an online training module on protecting children from secondhand
- smoke exposure: impact on knowledge, confidence and self-reported practice of health and
- social care professionals. *Bmc Public Health* 2015;15:6. doi: 10.1186/s12889-015-2488-5
44. Susi AK, Montarat T, Petcharat P, et al. Impact of Smoking Cessation Training for Community
- Pharmacists in Indonesia. *Asian Pacific Journal of Cancer Prevention* 2015;16(8):3319-23.
45. Williams JM, Miskimen T, Minsky S, et al. Increasing Tobacco Dependence Treatment Through
- Continuing Education Training for Behavioral Health Professionals. *Psychiatric Services*
- 2015;66(1):21-26. doi: doi:10.1176/appi.ps.201300523

- 1  
2  
3 46. Applegate BW, Sheffer CE, Crews KM, et al. A survey of tobacco-related knowledge, attitudes and  
4 behaviours of primary care providers in Mississippi. *Journal of Evaluation in Clinical Practice*  
5 2008;14(4):537-44. doi: 10.1111/j.1365-2753.2007.00910.x  
6  
7 47. Payne TJ, Gaughf NW, Sutton MJ, et al. The impact of brief tobacco treatment training on practice  
8 behaviours, self-efficacy and attitudes among healthcare providers. *International Journal of*  
9 *Clinical Practice* 2014;68(7):882-89. doi: 10.1111/ijcp.12386  
10  
11 48. Zapka JG, Fletcher KE, Ma Y, et al. Physicians and Smoking Cessation: Development of Survey  
12 Measures. *Evaluation & the Health Professions* 1997;20(4):407-27. doi:  
13 10.1177/016327879702000403  
14  
15 49. Hodgetts G, Broers T, Godwin M. Smoking behaviour, knowledge and attitudes among Family  
16 Medicine physicians and nurses in Bosnia and Herzegovina. *BMC Fam Pract* 2004;5 doi:  
17 10.1186/1471-2296-5-12  
18  
19 50. Chang J-C, Lee Y-Y, Kuo L-N, et al. Knowledge, Attitudes, and Behavior Toward Smoking Cessation  
20 among Hospital Pharmacists in Taiwan. *Journal of Experimental & Clinical Medicine*  
21 2012;4(4):249-54. doi: <http://dx.doi.org/10.1016/j.jecm.2012.06.003>  
22  
23 51. Movsisyan NK, Varduhi P, Arusyak H, et al. Smoking behavior, attitudes, and cessation counseling  
24 among healthcare professionals in Armenia. *BMC Public Health* 2012;12(1):1-8. doi:  
25 10.1186/1471-2458-12-1028  
26  
27 52. Vogt F, Hall S, Marteau TM. General practitioners' and family physicians' negative beliefs and  
28 attitudes towards discussing smoking cessation with patients: a systematic review.  
29 2005;100(10):1423-31. doi: doi:10.1111/j.1360-0443.2005.01221.x  
30  
31 53. Saba M, Bittoun R, Saini B. A Workshop on Smoking Cessation for Pharmacy Students. *American*  
32 *Journal of Pharmaceutical Education* 2013;77(9):198. doi: 10.5688/ajpe779198  
33  
34 54. Stolz D, Langewitz W, Meyer A, et al. Enhanced Didactic Methods of Smoking Cessation Training  
35 for Medical Students—A Randomized Study. *Nicotine & Tobacco Research* 2012;14(2):224-28.  
36 doi: 10.1093/ntr/ntr186  
37  
38  
39  
40  
41  
42  
43  
44  
45  
46  
47  
48  
49  
50  
51  
52  
53  
54  
55  
56  
57  
58  
59  
60

Table 1: Healthcare providers' characteristics

| Variable           | All trainees | Nurses       | Medical Assistant | Doctors      | Pharmacists  |
|--------------------|--------------|--------------|-------------------|--------------|--------------|
| Total trainees     | n (%)        | n (%)        | n (%)             | n (%)        | n (%)        |
|                    | 218 (100)    | 34 (15.60)   | 44 (20.2)         | 98 (44.9)    | 42 (19.3)    |
| Age (years old)    | 32.59 (6.69) | 32.64 (8.03) | 29.47 (4.58)      | 35.21 (7.09) | 29.67 (2.91) |
| Mean (SD)          |              |              |                   |              |              |
| Working experience | 7.26 (5.80)  | 8.56 (7.57)  | 5.25 (3.90)       | 8.83 (6.29)  | 4.64 (1.95)  |
| Mean (SD)          |              |              |                   |              |              |
| Gender             |              |              |                   |              |              |
| Male               | 77 (35.3)    | 2 (5.9)      | 40 (90.9)         | 27 (27.6)    | 8 (19.0)     |
| Female             | 141 (64.7)   | 32 (94.1)    | 4 (9.1)           | 71 (72.4)    | 34 (81.0)    |
| Ethnicity          |              |              |                   |              |              |
| Malay              | 181 (83.0)   | 33 (97.1)    | 43 (97.7)         | 77 (78.6)    | 28 (66.7)    |
| Chinese            | 16 (7.3)     | 0            | 0                 | 7 (7.1)      | 9 (21.4)     |
| Indian             | 21 (9.6)     | 1 (2.9)      | 1 (2.3)           | 14 (14.3)    | 5 (11.9)     |
| Religion           |              |              |                   |              |              |
| Muslim             | 179 (82.1)   | 33 (97.1)    | 43 (97.7)         | 76 (77.6)    | 27 (64.3)    |
| Buddhist           | 8 (3.7)      | 0            | 0                 | 2 (2.0)      | 6 (14.3)     |
| Christian          | 12 (5.5)     | 0            | 0                 | 7 (7.1)      | 5 (11.9)     |
| Hindu              | 19 (8.7)     | 1 (2.9)      | 1 (2.3)           | 13 (13.3)    | 4 (9.5)      |
| Education          |              |              |                   |              |              |
| Diploma            | 73 (33.5)    | 32 (94.1)    | 40 (90.9)         | 1 (1.0)      | 0            |
| Bachelor           | 100 (45.9)   | 2 (5.9)      | 4 (9.1)           | 60 (61.2)    | 34 (81.0)    |
| Master             | 45 (20.6)    | 0            | 0                 | 37 (37.8)    | 8 (19.0)     |
| Smoking* status    |              |              |                   |              |              |
| Current smokers    | 6 (2.8)      | 0            | 6 (13.6)          | 0            | 0            |
| Former smokers     | 18 (8.4)     | 1 (3.1)      | 12 (27.3)         | 5 (5.2)      | 0            |
| Non-smokers        | 191 (88.8)   | 31 (96.9)    | 26 (59.1)         | 92 (94.8)    | 42 (100.0)   |

n, frequency; %, percentage; \*n, 215; diploma, In the Malaysia context, diploma is a qualification obtained during tertiary education and minimum qualification to be employed as nurse or medical assistants in the government sector. It is of a level below the bachelor's degree qualification.

Table 2: Paired sample t-test comparing pre- and post-tests for each item and total knowledge score.

| Variables                     | Pre-training | Post-training | 95% CI for Mean | <i>t</i> |
|-------------------------------|--------------|---------------|-----------------|----------|
|                               | Mean (SD)    | Mean (SD)     | Difference      |          |
| 1. Irritability               | 0.89 (0.31)  | 0.99 (0.10)   | 0.05, 0.15      | 4.25**   |
| 2. Depression                 | 0.73 (0.45)  | 0.98 (0.15)   | 0.18, 0.31      | 7.63**   |
| 3. Restlessness               | 0.95 (0.18)  | 0.99 (0.10)   | 0.00, 0.05      | 1.90     |
| 4. Poor concentration         | 0.92 (0.27)  | 0.99 (0.12)   | 0.02, 0.10      | 3.22*    |
| 5. Increased appetite         | 0.52 (0.50)  | 0.85 (0.36)   | 0.26, 0.39      | 9.83**   |
| 6. Weight gain                | 0.51 (0.50)  | 0.82 (0.38)   | 0.24, 0.38      | 8.52**   |
| 7. Light headedness           | 0.82 (0.39)  | 0.96 (0.20)   | 0.09, 0.19      | 5.20**   |
| 8. Night time awakening       | 0.64 (0.48)  | 0.90 (0.30)   | 0.20, 0.33      | 7.95**   |
| 9. Constipation               | 0.47 (0.50)  | 0.84 (0.37)   | 0.30, 0.44      | 10.2**   |
| 10. Diarrhoea                 | 0.22 (0.42)  | 0.27 (0.45)   | 0.01, 0.11      | 1.51     |
| 11. Mouth ulcers              | 0.32 (0.47)  | 0.80 (0.40)   | 0.40, 0.55      | 12.38**  |
| 12. Urge to smoke             | 0.95(0.21)   | 0.98 (0.15)   | 0.00, 0.05      | 1.67     |
| <b>Total knowledge scores</b> | 7.96(2.34)   | 10.35 (1.57)  | 2.08, 2.70      | 15.32**  |

SD, standard deviation; Knowledge items were measured by Yes (1) or No (0) with a total maximum score of 12.

\*\* $p < 0.001$

\* $p < 0.05$



Table 3: Paired sample t-test comparing pre- and post-tests for each item and total attitude score.

| Items                                                                                                             | Pre-training        | Post-training       | 95% CI for<br>Mean<br>Difference | <i>t</i>      |
|-------------------------------------------------------------------------------------------------------------------|---------------------|---------------------|----------------------------------|---------------|
|                                                                                                                   | Mean (SD)           | Mean (SD)           |                                  |               |
| 1. A patient's chance of quitting smoking increases if the healthcare provider advises him/her to quit.           | 3.85 (0.89)         | 4.52 (0.67)         | 0.54, 0.79                       | 10.62**       |
| 2. Patients want you to advise them to stop using any tobacco products. Healthcare providers like you should..... | 3.59 (0.86)         | 4.34 (0.75)         | 0.61, 0.88                       | 11.05**       |
| 3. Get specific training on smoking cessation counselling techniques.                                             | 4.56 (0.60)         | 4.72 (0.57)         | 0.06, 0.27                       | 3.20*         |
| 4. Set a good example for their patients and public by not using any tobacco products.                            | 4.64 (0.58)         | 4.75 (0.55)         | 0.01, 0.20                       | 2.20*         |
| 5. Routinely ask patients/clients about tobacco use.                                                              | 4.38 (0.66)         | 4.69 (0.59)         | 0.19, 0.42                       | 5.39**        |
| 6. Routinely ask parents/guardians about tobacco use during paediatric visits.                                    | 4.29 (0.74)         | 4.61 (0.70)         | 0.22, 0.45                       | 5.23**        |
| 7. Routinely advise patients/clients who use any tobacco products to quit.                                        | 4.49 (0.65)         | 4.72 (0.59)         | 0.12, 0.33                       | 4.24**        |
| 8. Routinely assist patients using any tobacco products to quit.                                                  | 4.52 (0.64)         | 4.71 (0.60)         | 0.08, 0.29                       | 3.42*         |
| <b>Total Attitude scores</b>                                                                                      | <b>34.32 (4.12)</b> | <b>37.04 (3.92)</b> | <b>2.07, 3.37</b>                | <b>8.24**</b> |

SD, standard deviation; Attitude items were measured by using a 5-point Likert scale strongly disagree (1), disagree (2), neither disagree/agree (3), agree (4) and strongly agree (5) with a total maximum score of 40.

\*\* $p < 0.001$

\* $p < 0.05$

Table 4: Paired sample t-test comparing pre- and post-tests for each item and total self-efficacy score

| Items                                                                                                                               | Pre-training<br>Mean (SD) | Post-training<br>Mean (SD) | 95% CI for Mean<br>Difference | t       |
|-------------------------------------------------------------------------------------------------------------------------------------|---------------------------|----------------------------|-------------------------------|---------|
| 1. I know appropriate questions to ask my patients.                                                                                 | 3.78 (0.84)               | 4.45 (0.60)                | 0.55, 0.78                    | 11.32** |
| 2. I am able to motivate my patients who are interested to quit smoking.                                                            | 3.85 (0.81)               | 4.40 (0.62)                | 0.43, 0.66                    | 9.47**  |
| 3. I am able to assist patients to quit even if the patient thinks that it is difficult to give up.                                 | 3.68 (0.81)               | 4.27 (0.65)                | 0.47, 0.71                    | 9.73**  |
| 4. I have the pharmacological therapy skills to assist patients to quit smoking.                                                    | 3.35 (1.06)               | 4.15 (0.87)                | 0.65, 0.94                    | 10.57** |
| 5. I have the behavioural therapy skills to assist patients to quit smoking.                                                        | 3.28 (0.96)               | 4.14 (0.72)                | 0.71, 1.01                    | 11.57** |
| 6. I can advise patients to consider smoking cessation.                                                                             | 4.14 (4.14)               | 4.50 (0.56)                | 0.26, 0.47                    | 6.67**  |
| 7. I can provide counselling when time is limited.                                                                                  | 3.18 (0.97)               | 3.89 (0.94)                | 0.55, 0.85                    | 9.32**  |
| 8. I can counsel patients who are not interested in quitting.                                                                       | 3.31 (0.94)               | 4.05 (0.82)                | 0.60, 0.89                    | 10.12** |
| 9. I know how to prescribe medication (nicotine replacement therapy/bupropion) to treat tobacco dependency.                         | 2.93 (1.26)               | 3.81 (1.07)                | 0.69, 1.05                    | 9.56**  |
| 10. I can assess patient's different stages of readiness to quit smoking.                                                           | 3.50 (0.96)               | 4.17 (0.75)                | 0.53, 0.79                    | 9.89**  |
| 11. I can assess patient's level of nicotine dependency using the Fagerstrom test.                                                  | 3.43 (1.21)               | 4.30 (0.86)                | 0.70, 1.03                    | 10.35** |
| 12. I can use smokerlyzer to determine patient's carbon monoxide level.                                                             | 2.63 (1.34)               | 4.28 (1.07)                | 1.43, 1.86                    | 15.11** |
| 13. I can assist recent quitters to learn how to cope with situations or triggers that might lead them to relapse to using tobacco. | 3.37 (1.02)               | 4.28 (0.70)                | 0.76, 1.06                    | 11.86** |
| <b>Total Self-efficacy scores</b>                                                                                                   | 40.31 (8.61)              | 54.67 (7.45)               | 13.14, 15.58                  | 23.22** |

SD: standard deviation; Self-efficacy items were measured by using a five-point Likert scale from certainly not (1), probably not (2), neutral (3), probably (4) and certainly (5), with a total maximum score of 65.

\*\* $p < 0.001$

\* $p < 0.05$



Figure 1: Mean healthcare providers' scores on knowledge, attitude and self-efficacy at pre and post-training. Error bars represent standard errors

For peer review only

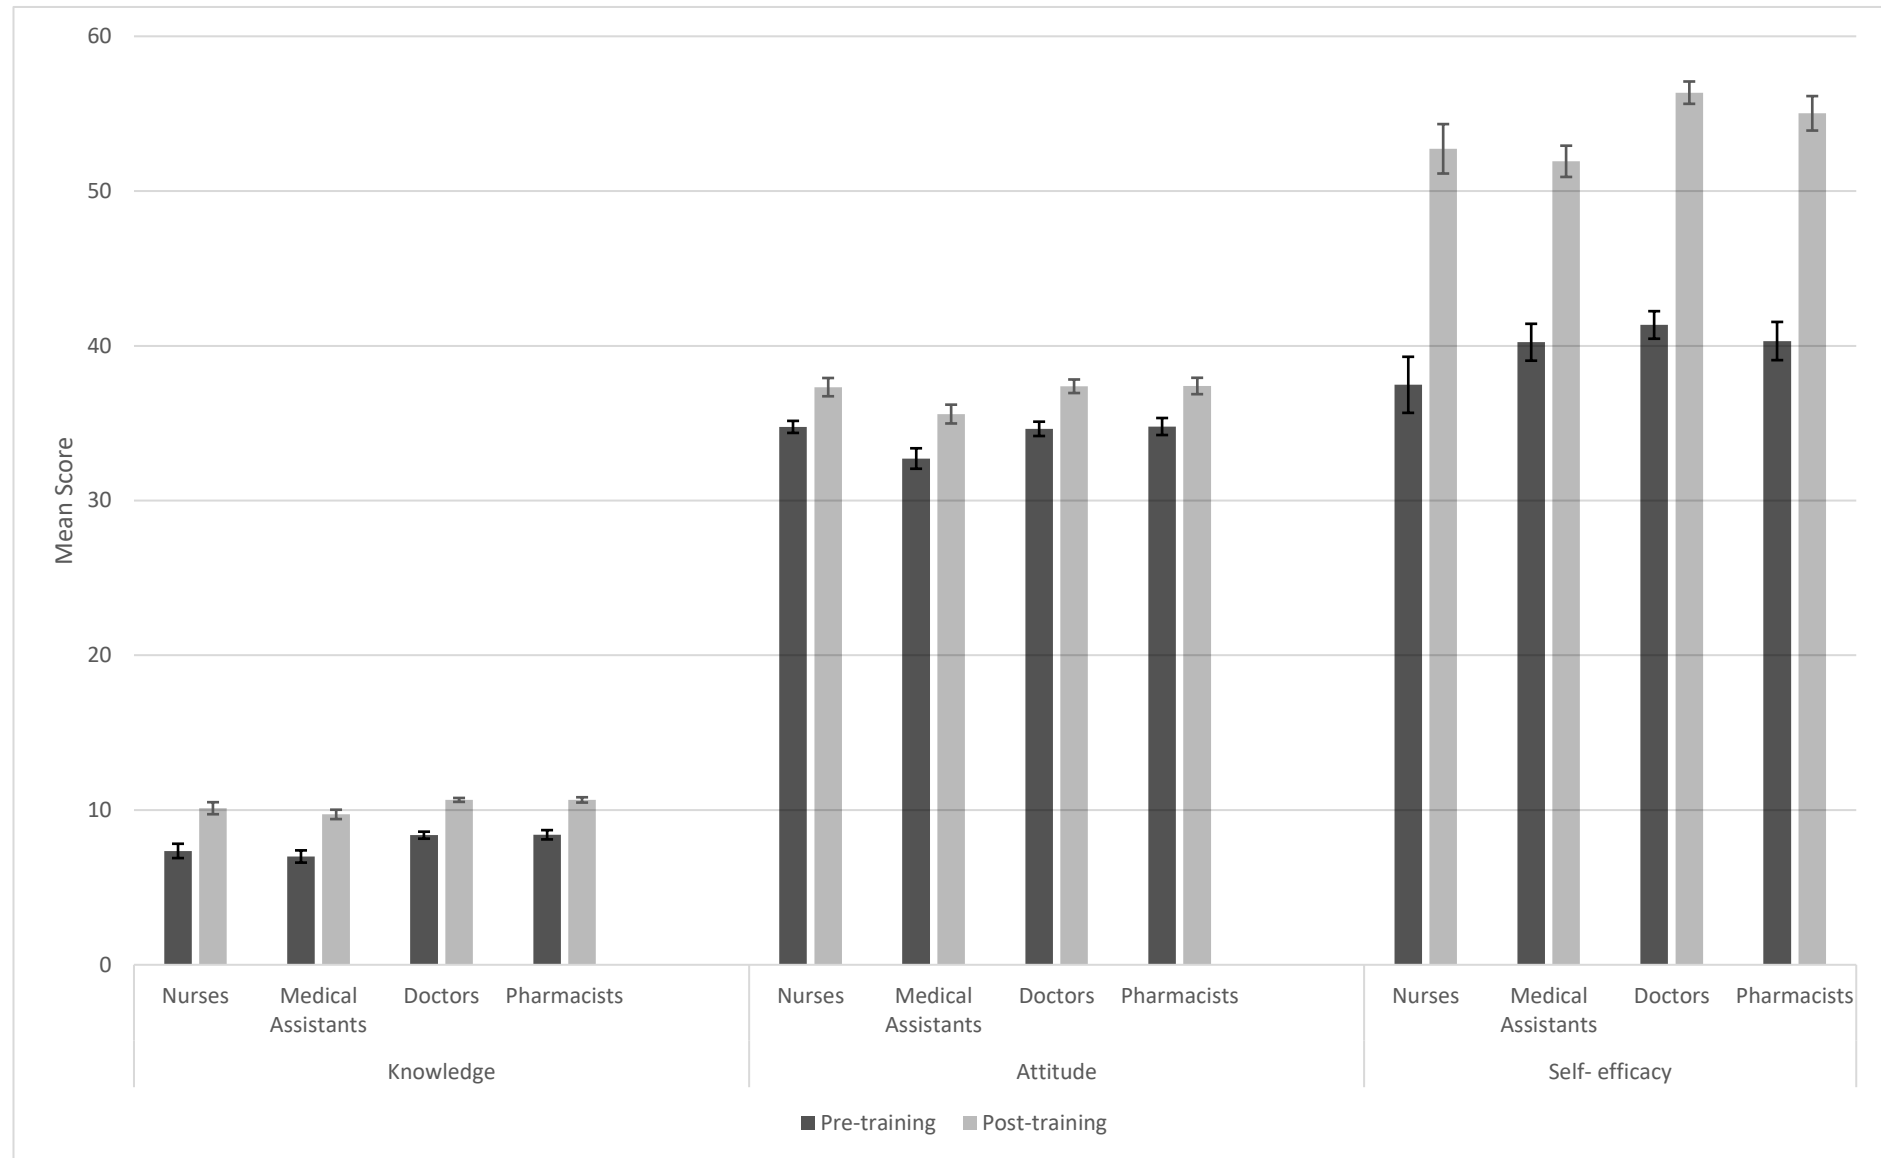

Figure 1: Mean healthcare providers' scores on knowledge, attitude and self-efficacy at pre and post-training. Error bars represent standard errors

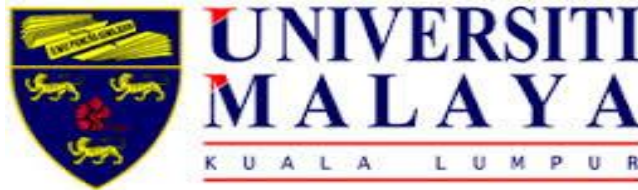

**SURVEY QUESTION: KNOWLEDGE, ATTITUDE & BEHAVIOR AMONG HEALTHCARE PROVIDERS TOWARDS SMOKING CESSATION INTERVENTION.**

**Department of Social and Preventive Medicine, Faculty of Medicine,  
University of Malaya, 50603 Kuala Lumpur Malaysia**

**THIS BOOKLET CONSISTS OF 7 SECTIONS**

| <b>Section</b> | <b>Topic</b>                                                       | <b>Page</b>    |
|----------------|--------------------------------------------------------------------|----------------|
| <b>A</b>       | <b>Demographic background</b>                                      | <b>1 – 3</b>   |
| <b>B</b>       | <b>Knowledge of smoking cessation intervention</b>                 | <b>4 - 6</b>   |
| <b>C</b>       | <b>Attitude towards smoking cessation intervention</b>             | <b>7</b>       |
| <b>D</b>       | <b>Smoking cessation intervention self-efficacy</b>                | <b>10 - 11</b> |
| <b>E</b>       | <b>Smoking cessation intervention behavior</b>                     | <b>8 - 10</b>  |
| <b>F</b>       | <b>Barriers to the provision of smoking cessation intervention</b> | <b>11 - 12</b> |

Instructions to respondents:

- 1) Please answer all the questions in this booklet.
- 2) Please consult us if you need further clarification.

All information provided by you is confidential. Identification number will not be associated with the data. We are only interested in the overall results of the questionnaire. You will not be personally identifiable. Access to the data obtained from the questionnaire is limited only to individuals involved in the data analysis. The data collected will be used in projects related to this topic.

**For further information, please contact:**

A/P Dr. Farizah binti Mohd Hairi ([farizah@um.edu.my](mailto:farizah@um.edu.my))  
A/P Dr. Amer Siddiq bin Amer Nordin ([amersiddiq@um.edu.my](mailto:amersiddiq@um.edu.my))  
Siti Idayu binti Hasan ([ayu\\_umcas@um.edu.my](mailto:ayu_umcas@um.edu.my))

**Name:**

**NRIC:**

**Institution/Organisation:**

**Phone no:**

| Time Point | T0 | T1 | T2 | T3 | T4 |
|------------|----|----|----|----|----|
|------------|----|----|----|----|----|

| ID Number |
|-----------|
|-----------|

### SECTION A: DEMOGRAPHIC BACKGROUND

**Instruction: Kindly READ all questions and mark (X) accordingly.**

- A1. What is your current age? \_\_\_\_\_ years \_\_\_\_\_ months
- A2. What is your gender?  1. Male  2. Female
- A3. What is your ethnic group?  1. Malay  2. Chinese  
 3. Indian  4. Others  
\_\_\_\_\_ (please specify)
- A4. What is your religion?  1. Islam  2. Buddhism  
 3. Christianity  4. Hinduism  
 5. Others \_\_\_\_\_ (please specify)
- A5. What is your highest qualification?  1. Diploma  2. Bachelor  
 3. Master  4. PhD  
 5. Others \_\_\_\_\_ (please specify)
- A6. Which university did you graduate from?  1. Local  2. International
- A7. Where is your practice location?  1. Urban  2. Rural
- A8. Where is your current workplace?  1. Public hospital  2. Public clinic  
 3. Private hospital  4. Private clinic  
 5. Others \_\_\_\_\_ (please specify)
- A9. What is your occupation?  1. Nurse  2. Medical Assistant  
 3. Doctor  
Specialisation: \_\_\_\_\_  
 4. Dentist  
 5. Pharmacist  6. Others  
\_\_\_\_\_ (please specify)

| Time Point | T0 | T1 | T2 | T3 | T4 |
|------------|----|----|----|----|----|
|------------|----|----|----|----|----|

| ID Number |  |
|-----------|--|
|-----------|--|

A10. What is your status on tobacco use (including manufactured cigarettes, hand rolled cigarettes, kretek pipes, curuts, cigars, cigarillos, shisha/hookah, e-cigarette and smokeless tobacco)?

1. Current smoker  
(A person who daily or occasionally smokes any tobacco product)
2. Former smoker  
(A person, who in the past, made use of at least one smoked tobacco product occasionally for a period of three months or more, or daily for a period of one month or more)
3. Non-smoker  
(A person currently does not smoke at all)

A11. How many years have you been in practice? \_\_\_\_\_ years \_\_\_\_\_ months

A12. On the average, how long do you spend your time for any of your patients/clients?  minutes

A13. In a typical week of practice, what percentage of your patients/clients are smokers?

1. 0-25%
2. 26%-50%
3. 51%-75%
4. 76%- 100%
5. Don't know

A14. Does your current workplace have a quit smoking clinic?

1. Yes
2. No
3. Don't know

| Time Point | T0 | T1 | T2 | T3 | T4 |
|------------|----|----|----|----|----|
|------------|----|----|----|----|----|

| ID Number |  |
|-----------|--|
|-----------|--|

1  
2  
3  
4  
5  
6  
7  
8  
9  
10  
11  
12  
13  
14  
15  
16  
17  
18  
19  
20  
21  
22  
23  
24  
25  
26  
27  
28  
29  
30  
31  
32  
33  
34  
35  
36  
37  
38  
39  
40  
41  
42  
43  
44  
45  
46  
47  
48  
49  
50  
51  
52  
53  
54  
55  
56  
57  
58  
59  
60

A15. Have you attended any educational program on smoking cessation?  1. Yes  2. No (proceed to A16)

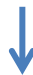

a. When did you went for smoking cessation training?

1. One month ago  
 2. 3 months ago  
 3. 6 months ago  
 4. More than 6 months ago

b. Place of training

1. Workplace  
 2. Outside Workplace

c. Was/were the previous training(s) adequate for you to provide smoking cessation treatment?

1. Adequate  
 2. Inadequate  
 3. Unsure

d. For question c, what is your definition of adequate?

---

---

---

A16. Are you interested in upgrading your smoking cessation counselling skills?

1. Not at all interested  
 2. Slightly interested  
 3. Moderately interested  
 4. Extremely interested

| Time Point | T0 | T1 | T2 | T3 | T4 |
|------------|----|----|----|----|----|
|------------|----|----|----|----|----|

| ID Number |  |
|-----------|--|
|-----------|--|

### SECTION B: KNOWLEDGE

Based on your knowledge, answer the following questions by marking an (X) in the appropriate box.

| No. | Item                 | Yes (1)                  | No (0)                   |
|-----|----------------------|--------------------------|--------------------------|
| a.  | Irritability         | <input type="checkbox"/> | <input type="checkbox"/> |
| b.  | Depression           | <input type="checkbox"/> | <input type="checkbox"/> |
| c.  | Restlessness         | <input type="checkbox"/> | <input type="checkbox"/> |
| d.  | Poor concentration   | <input type="checkbox"/> | <input type="checkbox"/> |
| e.  | Increased appetite   | <input type="checkbox"/> | <input type="checkbox"/> |
| f.  | Weight gain          | <input type="checkbox"/> | <input type="checkbox"/> |
| g.  | Light headedness     | <input type="checkbox"/> | <input type="checkbox"/> |
| h.  | Night time awakening | <input type="checkbox"/> | <input type="checkbox"/> |
| i.  | Constipation         | <input type="checkbox"/> | <input type="checkbox"/> |
| j.  | Diarrhea             | <input type="checkbox"/> | <input type="checkbox"/> |
| k.  | Mouth ulcers         | <input type="checkbox"/> | <input type="checkbox"/> |
| l.  | Urge to smoke        | <input type="checkbox"/> | <input type="checkbox"/> |

| Time Point | T0 | T1 | T2 | T3 | T4 |
|------------|----|----|----|----|----|
|------------|----|----|----|----|----|

| ID Number |  |
|-----------|--|
|-----------|--|

### SECTION C: ATTITUDE TOWARDS SMOKING CESSATION INTERVENTION

Attitude is the tendency, based on trust and experience, to respond to smoking cessation intervention with specific methods and approaches.

Instruction: Please mark (X) one box per statement

| No.                                             | Item                                                                                                          | Strongly disagree (1)    | Disagree (2)             | Neither disagree or Agree (3) | Agree (4)                | Strongly agree (5)       |
|-------------------------------------------------|---------------------------------------------------------------------------------------------------------------|--------------------------|--------------------------|-------------------------------|--------------------------|--------------------------|
| C1.                                             | A patient's/client's chance of quitting smoking increases if the healthcare provider advises him/her to quit. | <input type="checkbox"/> | <input type="checkbox"/> | <input type="checkbox"/>      | <input type="checkbox"/> | <input type="checkbox"/> |
| C2.                                             | Patients/clients want you to advise them to stop using any tobacco products.                                  | <input type="checkbox"/> | <input type="checkbox"/> | <input type="checkbox"/>      | <input type="checkbox"/> | <input type="checkbox"/> |
| <b>Healthcare providers like you should....</b> |                                                                                                               |                          |                          |                               |                          |                          |
| C3.                                             | get specific training on smoking cessation counselling techniques.                                            | <input type="checkbox"/> | <input type="checkbox"/> | <input type="checkbox"/>      | <input type="checkbox"/> | <input type="checkbox"/> |
| C4.                                             | set a good example for their patients/clients and public by not using any tobacco products.                   | <input type="checkbox"/> | <input type="checkbox"/> | <input type="checkbox"/>      | <input type="checkbox"/> | <input type="checkbox"/> |
| C5.                                             | routinely ask patients/clients about tobacco use.                                                             | <input type="checkbox"/> | <input type="checkbox"/> | <input type="checkbox"/>      | <input type="checkbox"/> | <input type="checkbox"/> |
| C6.                                             | routinely ask parents/guardians about tobacco use during paediatric visits.                                   | <input type="checkbox"/> | <input type="checkbox"/> | <input type="checkbox"/>      | <input type="checkbox"/> | <input type="checkbox"/> |
| C7.                                             | routinely advise patients/clients who use any tobacco products to quit.                                       | <input type="checkbox"/> | <input type="checkbox"/> | <input type="checkbox"/>      | <input type="checkbox"/> | <input type="checkbox"/> |
| C8.                                             | routinely assist patients/clients using any tobacco products to quit.                                         | <input type="checkbox"/> | <input type="checkbox"/> | <input type="checkbox"/>      | <input type="checkbox"/> | <input type="checkbox"/> |



| Time Point | T0 | T1 | T2 | T3 | T4 |
|------------|----|----|----|----|----|
|------------|----|----|----|----|----|

| ID Number |  |
|-----------|--|
|-----------|--|

### SECTION D: SMOKING CESSATION INTERVENTION SELF-EFFICACY

**Self-efficacy is one's belief in one's ability to succeed in specific situations or accomplish a task in smoking cessation intervention.**

**Instruction: Please mark (X) one box per statement.**

| No.  | Item                                                                                                     | Certainly not (1)        | Probably not (2)         | Neutral or Don't know (3) | Probably (4)             | Certainly (5)            |
|------|----------------------------------------------------------------------------------------------------------|--------------------------|--------------------------|---------------------------|--------------------------|--------------------------|
| D1.  | I know appropriate questions to ask my patients/clients.                                                 | <input type="checkbox"/> | <input type="checkbox"/> | <input type="checkbox"/>  | <input type="checkbox"/> | <input type="checkbox"/> |
| D2.  | I am able to motivate my patients/clients who are interested to quit smoking.                            | <input type="checkbox"/> | <input type="checkbox"/> | <input type="checkbox"/>  | <input type="checkbox"/> | <input type="checkbox"/> |
| D3.  | I am able to assist patients/clients to quit even if the patient thinks that it is difficult to give up. | <input type="checkbox"/> | <input type="checkbox"/> | <input type="checkbox"/>  | <input type="checkbox"/> | <input type="checkbox"/> |
| D4.  | I have the pharmacological therapy skills to assist patients/clients to quit smoking.                    | <input type="checkbox"/> | <input type="checkbox"/> | <input type="checkbox"/>  | <input type="checkbox"/> | <input type="checkbox"/> |
| D5.  | I have the behavioral therapy skills to assist patients/clients to quit smoking.                         | <input type="checkbox"/> | <input type="checkbox"/> | <input type="checkbox"/>  | <input type="checkbox"/> | <input type="checkbox"/> |
| D6.  | I can advise patients/clients to consider smoking cessation.                                             | <input type="checkbox"/> | <input type="checkbox"/> | <input type="checkbox"/>  | <input type="checkbox"/> | <input type="checkbox"/> |
| D7.  | I can provide counselling when time is limited.                                                          | <input type="checkbox"/> | <input type="checkbox"/> | <input type="checkbox"/>  | <input type="checkbox"/> | <input type="checkbox"/> |
| D8.  | I can counsel patients/clients who are not interested in quitting.                                       | <input type="checkbox"/> | <input type="checkbox"/> | <input type="checkbox"/>  | <input type="checkbox"/> | <input type="checkbox"/> |
| D9.  | I know how to prescribe medication (nicotine replacement therapy/bupropion) to treat tobacco dependency. | <input type="checkbox"/> | <input type="checkbox"/> | <input type="checkbox"/>  | <input type="checkbox"/> | <input type="checkbox"/> |
| D10. | I can assess patient's/client's different stages of readiness to quit smoking.                           | <input type="checkbox"/> | <input type="checkbox"/> | <input type="checkbox"/>  | <input type="checkbox"/> | <input type="checkbox"/> |
| D11. | I can assess patient's level of nicotine dependency using the Fagerstrom test.                           | <input type="checkbox"/> | <input type="checkbox"/> | <input type="checkbox"/>  | <input type="checkbox"/> | <input type="checkbox"/> |
| D12. | I can use smokerlyzer to determine patient's/client's carbon monoxide level.                             | <input type="checkbox"/> | <input type="checkbox"/> | <input type="checkbox"/>  | <input type="checkbox"/> | <input type="checkbox"/> |

|                   |           |           |           |           |           |
|-------------------|-----------|-----------|-----------|-----------|-----------|
| <b>Time Point</b> | <b>T0</b> | <b>T1</b> | <b>T2</b> | <b>T3</b> | <b>T4</b> |
|-------------------|-----------|-----------|-----------|-----------|-----------|

|                  |  |
|------------------|--|
| <b>ID Number</b> |  |
|------------------|--|

|             |                                                                                                                                 |                          |                          |                          |                          |                          |
|-------------|---------------------------------------------------------------------------------------------------------------------------------|--------------------------|--------------------------|--------------------------|--------------------------|--------------------------|
| <b>D13.</b> | I can assist recent quitters to learn how to cope with situations or triggers that might lead them to relapse to using tobacco. | <input type="checkbox"/> |
|-------------|---------------------------------------------------------------------------------------------------------------------------------|--------------------------|--------------------------|--------------------------|--------------------------|--------------------------|

**SECTION E: SMOKING CESSATION INTERVENTION BEHAVIOR**

**The way in which a person acts in response to any particular situation or stimulus regarding smoking cessation intervention.**

**Instruction: Please mark (X) one box per statement**

| No. | Item | Never (1) | Rarely (2) | Some-times (3) | Often (4) | Always (5) |
|-----|------|-----------|------------|----------------|-----------|------------|
|-----|------|-----------|------------|----------------|-----------|------------|

**In your current practice, how often do you....**

|             |                                                                                                     |                          |                          |                          |                          |                          |
|-------------|-----------------------------------------------------------------------------------------------------|--------------------------|--------------------------|--------------------------|--------------------------|--------------------------|
| <b>E1.</b>  | ask patients/clients whether they smoke?                                                            | <input type="checkbox"/> |
| <b>E2.</b>  | ask patients/clients the number of cigarettes smoked per day?                                       | <input type="checkbox"/> |
| <b>E3.</b>  | advise patients/clients who smoke to quit smoking?                                                  | <input type="checkbox"/> |
| <b>E4.</b>  | advise female patients/clients to quit smoking if they are pregnant or planning to become pregnant? | <input type="checkbox"/> |
| <b>E5.</b>  | advise patients/clients to quit smoking if you think their illness is related to smoking?           | <input type="checkbox"/> |
| <b>E6.</b>  | assess patients'/client's readiness to quit smoking?                                                | <input type="checkbox"/> |
| <b>E7.</b>  | assess reasons for quitting/staying quit smoking?                                                   | <input type="checkbox"/> |
| <b>E8.</b>  | assist those who are not interested in quitting smoking to think about quitting?                    | <input type="checkbox"/> |
| <b>E9.</b>  | assist those who are interested in quitting smoking to develop a plan to quit?                      | <input type="checkbox"/> |
| <b>E10.</b> | assist in setting quit dates?                                                                       | <input type="checkbox"/> |
| <b>E11.</b> | arrange referrals for appropriate smoking cessation services?                                       | <input type="checkbox"/> |

| Time Point | T0 | T1 | T2 | T3 | T4 |
|------------|----|----|----|----|----|
|------------|----|----|----|----|----|

| ID Number |  |
|-----------|--|
|-----------|--|

|      |                                                                                                                       |                          |                          |                          |                          |                          |
|------|-----------------------------------------------------------------------------------------------------------------------|--------------------------|--------------------------|--------------------------|--------------------------|--------------------------|
| E12. | provide counselling for patients/clients who want to quit smoking?                                                    | <input type="checkbox"/> |
| E13. | provide educational materials related to smoking cessation?                                                           | <input type="checkbox"/> |
| E14. | document tobacco-relevant discussion and plans in medical record?                                                     | <input type="checkbox"/> |
| E15. | use Fragerstrom test to assess patient's/client's level of addiction?                                                 | <input type="checkbox"/> |
| E16. | use smokerlyzer to determine patient's/client's Carbon Monoxide level?                                                | <input type="checkbox"/> |
| E17. | prescribe or recommend the purchase of nicotine replacement therapy products for patients/clients attempting to quit? | <input type="checkbox"/> |
| E18. | provide treatment maintenance and follow-up services to those who have quit smoking?                                  | <input type="checkbox"/> |
| E19. | arrange a follow up visit or phone call to discuss quitting smoking?                                                  | <input type="checkbox"/> |

| Time Point | T0 | T1 | T2 | T3 | T4 |
|------------|----|----|----|----|----|
|------------|----|----|----|----|----|

| ID Number |  |
|-----------|--|
|-----------|--|

### SECTION F: BARRIERS TO THE PROVISION OF SMOKING CESSATION INTERVENTION

There are various barriers that might limit the capacity to offer smoking cessation intervention for patients. Please rate the importance of each of the following items that limit you from helping patients to quit smoking.

Instruction: Please mark (X) one box per statement

| No.  | Item                                                                   | Not a barrier (1)        | Some-what a barrier (2)  | Moderate barrier (3)     | Extreme Barrier (4)      |
|------|------------------------------------------------------------------------|--------------------------|--------------------------|--------------------------|--------------------------|
| F1.  | Patients/clients are not interested in quitting smoking.               | <input type="checkbox"/> | <input type="checkbox"/> | <input type="checkbox"/> | <input type="checkbox"/> |
| F2.  | Patients/clients are not ready to change.                              | <input type="checkbox"/> | <input type="checkbox"/> | <input type="checkbox"/> | <input type="checkbox"/> |
| F3.  | Patients/clients do not comply with the given pharmacological therapy. | <input type="checkbox"/> | <input type="checkbox"/> | <input type="checkbox"/> | <input type="checkbox"/> |
| F4.  | Patients/clients do not comply with the given behavioral therapy.      | <input type="checkbox"/> | <input type="checkbox"/> | <input type="checkbox"/> | <input type="checkbox"/> |
| F5.  | Lack of impact of pharmacological therapy on patients/clients.         | <input type="checkbox"/> | <input type="checkbox"/> | <input type="checkbox"/> | <input type="checkbox"/> |
| F6.  | Lack of impact of behavioral therapy on patients/clients.              | <input type="checkbox"/> | <input type="checkbox"/> | <input type="checkbox"/> | <input type="checkbox"/> |
| F7.  | Lack of knowledge of smoking cessation.                                | <input type="checkbox"/> | <input type="checkbox"/> | <input type="checkbox"/> | <input type="checkbox"/> |
| F8.  | Lack of time.                                                          | <input type="checkbox"/> | <input type="checkbox"/> | <input type="checkbox"/> | <input type="checkbox"/> |
| F9.  | Other health problems require priority treatment.                      | <input type="checkbox"/> | <input type="checkbox"/> | <input type="checkbox"/> | <input type="checkbox"/> |
| F10. | Lack of reimbursement to healthcare providers.                         | <input type="checkbox"/> | <input type="checkbox"/> | <input type="checkbox"/> | <input type="checkbox"/> |
| F11. | Lack of community resources to refer patients/clients.                 | <input type="checkbox"/> | <input type="checkbox"/> | <input type="checkbox"/> | <input type="checkbox"/> |
| F12. | Inadequate smoking cessation pharmaceutical drugs.                     | <input type="checkbox"/> | <input type="checkbox"/> | <input type="checkbox"/> | <input type="checkbox"/> |
| F13. | Lack of patient/client education materials.                            | <input type="checkbox"/> | <input type="checkbox"/> | <input type="checkbox"/> | <input type="checkbox"/> |
| F14. | Lack of smoking cessation training.                                    | <input type="checkbox"/> | <input type="checkbox"/> | <input type="checkbox"/> | <input type="checkbox"/> |
| F15. | Complexity of smoking cessation guidelines.                            | <input type="checkbox"/> | <input type="checkbox"/> | <input type="checkbox"/> | <input type="checkbox"/> |

**STROBE 2007 (v4) checklist of items to be included in reports of observational studies in epidemiology\***  
**Checklist for cohort, case-control, and cross-sectional studies (combined)**

| Section/Topic             | Item # | Recommendation                                                                                                                                                                                                                                                                                                                                                                                                                                                         | Reported on page #                             |
|---------------------------|--------|------------------------------------------------------------------------------------------------------------------------------------------------------------------------------------------------------------------------------------------------------------------------------------------------------------------------------------------------------------------------------------------------------------------------------------------------------------------------|------------------------------------------------|
| Title and abstract        | 1      | (a) Indicate the study’s design with a commonly used term in the title or the abstract                                                                                                                                                                                                                                                                                                                                                                                 | 1 & 2                                          |
|                           |        | (b) Provide in the abstract an informative and balanced summary of what was done and what was found                                                                                                                                                                                                                                                                                                                                                                    | 2                                              |
| <b>Introduction</b>       |        |                                                                                                                                                                                                                                                                                                                                                                                                                                                                        |                                                |
| Background/rationale      | 2      | Explain the scientific background and rationale for the investigation being reported                                                                                                                                                                                                                                                                                                                                                                                   | 4 - 8                                          |
| Objectives                | 3      | State specific objectives, including any pre-specified hypotheses                                                                                                                                                                                                                                                                                                                                                                                                      | 8                                              |
| <b>Methods</b>            |        |                                                                                                                                                                                                                                                                                                                                                                                                                                                                        |                                                |
| Study design              | 4      | Present key elements of study design early in the paper                                                                                                                                                                                                                                                                                                                                                                                                                | 10                                             |
| Setting                   | 5      | Describe the setting, locations, and relevant dates, including periods of recruitment, exposure, follow-up, and data collection                                                                                                                                                                                                                                                                                                                                        | 10 & 11                                        |
| Participants              | 6      | (a) <i>Cohort study</i> —Give the eligibility criteria, and the sources and methods of selection of participants. Describe methods of follow-up<br><i>Case-control study</i> —Give the eligibility criteria, and the sources and methods of case ascertainment and control selection. Give the rationale for the choice of cases and controls<br><i>Cross-sectional study</i> —Give the eligibility criteria, and the sources and methods of selection of participants | Not applicable<br><br>Not applicable<br><br>11 |
|                           |        | (b) <i>Cohort study</i> —For matched studies, give matching criteria and number of exposed and unexposed<br><i>Case-control study</i> —For matched studies, give matching criteria and the number of controls per case                                                                                                                                                                                                                                                 | Not applicable                                 |
| Variables                 | 7      | Clearly define all outcomes, exposures, predictors, potential confounders, and effect modifiers. Give diagnostic criteria, if applicable                                                                                                                                                                                                                                                                                                                               | 11                                             |
| Data sources/ measurement | 8*     | For each variable of interest, give sources of data and details of methods of assessment (measurement). Describe comparability of assessment methods if there is more than one group                                                                                                                                                                                                                                                                                   | 10 & 11                                        |
| Bias                      | 9      | Describe any efforts to address potential sources of bias                                                                                                                                                                                                                                                                                                                                                                                                              | 11                                             |
| Study size                | 10     | Explain how the study size was arrived at                                                                                                                                                                                                                                                                                                                                                                                                                              | 10                                             |
| Quantitative variables    | 11     | Explain how quantitative variables were handled in the analyses. If applicable, describe which groupings were chosen and why                                                                                                                                                                                                                                                                                                                                           | 12                                             |
| Statistical methods       | 12     | (a) Describe all statistical methods, including those used to control for confounding                                                                                                                                                                                                                                                                                                                                                                                  | 12                                             |
|                           |        | (b) Describe any methods used to examine subgroups and interactions                                                                                                                                                                                                                                                                                                                                                                                                    | Not applicable                                 |
|                           |        | (c) Explain how missing data were addressed                                                                                                                                                                                                                                                                                                                                                                                                                            | Not applicable                                 |
|                           |        | (d) <i>Cohort study</i> —If applicable, explain how loss to follow-up was addressed                                                                                                                                                                                                                                                                                                                                                                                    | Not applicable                                 |

|                          |     |                                                                                                                                                                                                              |                |
|--------------------------|-----|--------------------------------------------------------------------------------------------------------------------------------------------------------------------------------------------------------------|----------------|
|                          |     | <i>Case-control study</i> —If applicable, explain how matching of cases and controls was addressed                                                                                                           | Not applicable |
|                          |     | <i>Cross-sectional study</i> —If applicable, describe analytical methods taking account of sampling strategy                                                                                                 | Not applicable |
|                          |     | (e) Describe any sensitivity analyses                                                                                                                                                                        | Not applicable |
| <b>Results</b>           |     |                                                                                                                                                                                                              |                |
| Participants             | 13* | (a) Report numbers of individuals at each stage of study—eg numbers potentially eligible, examined for eligibility, confirmed eligible, included in the study, completing follow-up, and analysed            | 12             |
|                          |     | (b) Give reasons for non-participation at each stage                                                                                                                                                         | Not applicable |
|                          |     | (c) Consider use of a flow diagram                                                                                                                                                                           | Not applicable |
| Descriptive data         | 14* | (a) Give characteristics of study participants (eg demographic, clinical, social) and information on exposures and potential confounders                                                                     | 13             |
|                          |     | (b) Indicate number of participants with missing data for each variable of interest                                                                                                                          | 13             |
|                          |     | (c) <i>Cohort study</i> —Summarise follow-up time (eg, average and total amount)                                                                                                                             | Not applicable |
| Outcome data             | 15* | <i>Cohort study</i> —Report numbers of outcome events or summary measures over time                                                                                                                          | Not applicable |
|                          |     | <i>Case-control study</i> —Report numbers in each exposure category, or summary measures of exposure                                                                                                         | Not applicable |
|                          |     | <i>Cross-sectional study</i> —Report numbers of outcome events or summary measures                                                                                                                           | 13             |
| Main results             | 16  | (a) Give unadjusted estimates and, if applicable, confounder-adjusted estimates and their precision (eg, 95% confidence interval). Make clear which confounders were adjusted for and why they were included | Not applicable |
|                          |     | (b) Report category boundaries when continuous variables were categorized                                                                                                                                    | Not applicable |
|                          |     | (c) If relevant, consider translating estimates of relative risk into absolute risk for a meaningful time period                                                                                             | Not applicable |
| Other analyses           | 17  | Report other analyses done—eg analyses of subgroups and interactions, and sensitivity analyses                                                                                                               | Not applicable |
| <b>Discussion</b>        |     |                                                                                                                                                                                                              |                |
| Key results              | 18  | Summarise key results with reference to study objectives                                                                                                                                                     | 17 - 21        |
| Limitations              | 19  | Discuss limitations of the study, taking into account sources of potential bias or imprecision. Discuss both direction and magnitude of any potential bias                                                   | 21             |
| Interpretation           | 20  | Give a cautious overall interpretation of results considering objectives, limitations, multiplicity of analyses, results from similar studies, and other relevant evidence                                   | 17-21          |
| Generalisability         | 21  | Discuss the generalisability (external validity) of the study results                                                                                                                                        | 21             |
| <b>Other information</b> |     |                                                                                                                                                                                                              |                |
| Funding                  | 22  | Give the source of funding and the role of the funders for the present study and, if applicable, for the original study on which the present article is based                                                | 22             |

\*Give information separately for cases and controls in case-control studies and, if applicable, for exposed and unexposed groups in cohort and cross-sectional studies.

1  
2  
3  
4  
5  
6  
7  
8  
9  
10  
11  
12  
13  
14  
15  
16  
17  
18  
19  
20  
21  
22  
23  
24  
25  
26  
27  
28  
29  
30  
31  
32  
33  
34  
35  
36  
37  
38  
39  
40  
41  
42  
43  
44  
45  
46

**Note:** An Explanation and Elaboration article discusses each checklist item and gives methodological background and published examples of transparent reporting. The STROBE checklist is best used in conjunction with this article (freely available on the Web sites of PLoS Medicine at <http://www.plosmedicine.org/>, Annals of Internal Medicine at <http://www.annals.org/>, and Epidemiology at <http://www.epidem.com/>). Information on the STROBE Initiative is available at [www.strobe-statement.org](http://www.strobe-statement.org).

For peer review only
