# Supplementary material for: Empowering healthcare providers through smoking cessation training in Malaysia: a preintervention and postintervention evaluation on the improvement of knowledge, attitude and self-efficacy
Source: PubMed Central journal article supplement — BMJ Open. 2019 Sep 27;9(9):e030670. doi: 10.1136/bmjopen-2019-030670 (PMC6773327; doi:10.1136/bmjopen-2019-030670), 2019-09-27
Supplement: bmjopen-2019-030670supp001.pdf [file bmjopen-2019-030670supp001.pdf]

| Construct | Operational definition                                                                                                                      | Items                                                                                                                                                                                                                                                                                                                                                                                                                                                                                                                                                                                                                                                                                                                                                                                                                         | Responses                                                                                                                     |
|-----------|---------------------------------------------------------------------------------------------------------------------------------------------|-------------------------------------------------------------------------------------------------------------------------------------------------------------------------------------------------------------------------------------------------------------------------------------------------------------------------------------------------------------------------------------------------------------------------------------------------------------------------------------------------------------------------------------------------------------------------------------------------------------------------------------------------------------------------------------------------------------------------------------------------------------------------------------------------------------------------------|-------------------------------------------------------------------------------------------------------------------------------|
| Knowledge | Knowledge is an information, understanding or skill that you get from experience or education.                                              | <ol style="list-style-type: none"> <li>1. Irritability</li> <li>2. Depression</li> <li>3. Restlessness</li> <li>4. Poor concentration</li> <li>5. Increased appetite</li> <li>6. Weight gain</li> <li>7. Light headedness</li> <li>8. Night time awakening</li> <li>9. Constipation</li> <li>10. Diarrhea</li> <li>11. Mouth ulcers</li> <li>12. Urge to smoke</li> </ol>                                                                                                                                                                                                                                                                                                                                                                                                                                                     | <p>0 = No</p> <p>1 = Yes</p>                                                                                                  |
| Attitude  | Attitude is the tendency, based on trust and experience, to respond to smoking cessation intervention with specific methods and approaches. | <ol style="list-style-type: none"> <li>1. A patient's chance of quitting smoking increases if the healthcare provider advises him/her to quit.</li> <li>2. Patients want you to advise them to stop using any tobacco products.</li> </ol> <p>Healthcare providers like you should....</p> <ol style="list-style-type: none"> <li>3. get specific training on smoking cessation counselling techniques.</li> <li>4. set a good example for their patients and public by not using any tobacco products.</li> <li>5. routinely ask patients about tobacco use.</li> <li>6. routinely ask parents/guardians about tobacco use during pediatric visits.</li> <li>7. routinely advise patients who use any tobacco products to quit.</li> <li>8. routinely assist patients/clients using any tobacco products to quit.</li> </ol> | <p>1 = strongly disagree</p> <p>2 = disagree</p> <p>3 = neither disagree/agree</p> <p>4 = agree</p> <p>5 = strongly agree</p> |

|               |                                                                                                                                                                                                                                                                                                    |                                                                                                                                                                                                                                                                                                                                                                                                                                                                                                                                                                                                                                                                                                                                                                                                                                                                                                                                                                                                                                                                                                                                                                                                                                   |                                                                                                              |
|---------------|----------------------------------------------------------------------------------------------------------------------------------------------------------------------------------------------------------------------------------------------------------------------------------------------------|-----------------------------------------------------------------------------------------------------------------------------------------------------------------------------------------------------------------------------------------------------------------------------------------------------------------------------------------------------------------------------------------------------------------------------------------------------------------------------------------------------------------------------------------------------------------------------------------------------------------------------------------------------------------------------------------------------------------------------------------------------------------------------------------------------------------------------------------------------------------------------------------------------------------------------------------------------------------------------------------------------------------------------------------------------------------------------------------------------------------------------------------------------------------------------------------------------------------------------------|--------------------------------------------------------------------------------------------------------------|
| Self-Efficacy | Self-efficacy is one's belief in one's ability to succeed in specific situations or accomplish a task in smoking cessation intervention. Self-efficacy in this study is referring to the confidence to provide smoking cessation intervention using 5A's brief intervention for smoking cessation. | <ol style="list-style-type: none"> <li>1. I know appropriate questions to ask my patients/clients.</li> <li>2. I am able to motivate my patients who are interested to quit smoking.</li> <li>3. I am able to assist patients to quit even if the patient thinks that it is difficult to give up.</li> <li>4. I have the pharmacological therapy skills to assist patients to quit smoking.</li> <li>5. I have the behavioral therapy skills to assist patients to quit smoking.</li> <li>6. I can advise patients to consider smoking cessation.</li> <li>7. I can provide counselling when time is limited.</li> <li>8. I can counsel patients who are not interested in quitting.</li> <li>9. I know how to prescribe medication (nicotine replacement therapy/bupropion) to treat tobacco dependency.</li> <li>10. I can assess patient's different stages of readiness to quit smoking.</li> <li>11. I can assess patient's level of nicotine dependency using the Fagerstrom test.</li> <li>12. I can use smokerlyzer to determine patient's carbon monoxide level.</li> <li>13. I can assist recent quitters to learn how to cope with situations or triggers that might lead them to relapse to using tobacco.</li> </ol> | <p>1 = certainly not</p> <p>2 = probably not</p> <p>3 = neutral</p> <p>4 = probably</p> <p>5 = certainly</p> |
|---------------|----------------------------------------------------------------------------------------------------------------------------------------------------------------------------------------------------------------------------------------------------------------------------------------------------|-----------------------------------------------------------------------------------------------------------------------------------------------------------------------------------------------------------------------------------------------------------------------------------------------------------------------------------------------------------------------------------------------------------------------------------------------------------------------------------------------------------------------------------------------------------------------------------------------------------------------------------------------------------------------------------------------------------------------------------------------------------------------------------------------------------------------------------------------------------------------------------------------------------------------------------------------------------------------------------------------------------------------------------------------------------------------------------------------------------------------------------------------------------------------------------------------------------------------------------|--------------------------------------------------------------------------------------------------------------|
